# Supplementary material
Source: publisher figshare collection journal article supplement (https://tandf.figshare.com/ndownloader/files/30416245)
Supplement: Supplementary file 1 [file 30416245]

>1_Gl_pyramidata                       
????????????????????????????????????????????????????????????????????????????????
????????????????????????????????????????????????????????????????????????????????
????????????????????????????????????????????????????????????????????????????????
????????????????????????????????????????????????????????????????????????????????
????????????????????????????????????????????????????????????????????????????????
????????????????????????????????????????????????????????????????????????????????
????????????????????????????????????????????????????????????????????????????????
????????????????????????????????????????????????????????????????????????????????
?????????????????????????????????CCCCTAGTAACTGCGAGTGAAGCGGGAAAAGCTCAAATTTAAAATCT
GGCAGTCTTT-GGCTGTCCGAGTTGTAGTCTGGAGAAGTGTTTTCCGCGYTGGACCGTGTACAAGTCTCCTGGAACGGAG
CGTCATAGAGGGTGAGAATCCCGTCTTTGACACGGACTACCAGTGCTTTGTGATGCGCTCTCGAAGAGTCGAGTTGTTTG
GGAATGCAGCTCAAAATGGGTGGTGAATTCCATCTAAAGCTAAATATTGGCGAGAGACCGATAGCGAACAAGTACCGTGA
GGGAAAGATGAAAAGCACTTTGGAAAGAGAGTTAAACAGTACGTGAAATTGTTGAAAGGGAAACGCTTGAAGTCAGTCGC
GTTCGCCGAGACTCAGCCTTGC--CTTGGCTTGGTGTATTTCTCGGTAAACGGGCCAGCATCACTTTTGACCGCTGGAGA
AA-GGCAGGAGAAAGGTGGCACCC----TTGGGTGTGTTATAGTCTCTTGTTGCATACAGCGATGGGGAGTGAGGTACTC
A-GCACGCCTTTAT---GG-TCGGGG-TTCGCCCACGTT--CGTGCTTAGGATGCT-GGCGTAATGGCTTTAAACGACCC
GTCTTGAAACACGGACCAAGGAGTCTAACATGCCTGCGAGTGTTCGGGTGGAAAACCCGTGCGCGTAATTAAAGTGAAAG
TTGGGACCTCTGTCGTGGAGGGCACCGACGCCCGGACCAGACCTTTTGTGACGGATCTGCGGTAGAGCATGTATGTTGGG
ACCCGAAAGATGGTGAACTATGCCTGAATAGGGTGAAGCCAGAGGAAACTCTGGTGGAGGCTCGTAGCGATTCTGACGTG
CAAATCGATCGTCAAATTTGGGTATAGGGGCGAAAGACTAATCGA
>3_A_bernicchiae_MR12675               
????????????????????????????????????????????????????????????????????????????????
????????????????????????????????????????????????????????????????????????????????
????????????????????????????????????????????????????????????????????????????????
????????????????????????????????????????????????????????????????????????????????
????????????????????????????????????????????????????????????????????????????????
????????????????????????????????????????????????????????????????????????????????
????????????????????????????????????????????????????????????????????????????????
????????????????????????????????????????????????????????????????????????????????
?????????????????????????????????CCCCTAGTAACTGCGAGTGAAGCGGGAAAAGCTCAAATTTAAAATCT
GGCGGTCTTT-GGCCGTCCGAGTTGTAGTCTGGAGAAGTGCTTTCCGCGCTGGACCGTGTACAAGTCTCCTGGAACGGAG
CGTCATAGAGGGTGAGAATCCCGTCTTTGACACGGACAACCAGTGCTATGTGATGCGCTCTCAAAGAGTCGAGTTGTTTG
GGAATGCAGCTCAAAATGGGTGGTGAATTCCATCTAAAGCTAAATATTGGCGAGAGACCGATAGCGAACAAGTACCGTGA
GGGAAAGATGAAAAGCACTTTGGAAAGAGAGTTAAACAGTACGTGAAATTGTTGAAAGGGAAACGATTGAAGTCAGTCGC
GTCGTCCGGAACTCAGCCTTGCAATCTTGCCTGGTGTACTTTCCGGTTGACGGGCCAGCATCAATTTTGACCGTCGGATA
AG-GGTGGGGGAAATGTGGCACCT----CCGGGTGTGTTATAGTCCTCCATCGTATACGGCGGTTGGGATTGAGGAACTC
A-GCATGCCTTTAC---GG-TCGGGG-TTCGCCCACGTT--CATGCTTAGGATGCT-GGCGTAATGGCTTTAAACGACCC
GTCTTGAAACACGGACCAAGGAGTCTAACATGCCCGCGAGTGTTTGGGTGGAAAACCCATGCGCGTAATGAAAGTAAAAG
TTGGGACCTCTGTCGTGGAGGGCACCGACGCCCGGACCAGAACTTCTGTGACGGATCTGCGGTAGAGCGTGTATGTTGGG
ACCCGAAAGATGGTGAACTATGCCTGAATAGGGTGAAGCCAGAGGAAACTCTGGTGGAGGCTCGTAGCGATTCTGACGTG
CAAATCGATCGTCAAATTTGGGTATAGGGGCGAAAGACTAATCGA
>32_C_ravum_NH13291                    
????????????????????????????????????????????????????????????????????????????????
????????????????????????????????????????????????????????????????????????????????
????????????????????????????????????????????????????????????????????????????????
????????????????????????????????????????????????????????????????????????????????
????????????????????????????????????????????????????????????????????????????????
????????????????????????????????????????????????????????????????????????????????
????????????????????????????????????????????????????????????????????????????????
????????????????????????????????????????????????????????????????????????????????
?????????????????????????????????CCCCTAGTAACTGCGAGTGAAGCGGGAAAAGCTCAAATTTAAAATCT
GGCGGTCTCC-GGCCGTCCGAGTTGTAGTCTGGAGAAGCGTTTTCCGCGYTGGACCGTGTACAAGTCTCCTGGAACGGAG
CGTCATAGAGGGTGAGAATCCCGTCTTTGACACGGACCCC-AGTGCTTTGTGATGCGCTCTCAAAGAGTCGAGTTGTTTG
GGAATGCAGCTCAAAATGGGTGGTGAATTCCATCTAAAGCTAAATATTGGCGAGAGACCGATAGCGAACAAGTACCGTGA
GGGAAAGATGAAAAGCACTTTGGAAAGAGAGTTAAACAGTACGTGAAATTGTTGAAAGGGAAACGCTTGAAGTCAGTCGC
GTTGGCCGGGACTCAGCCTTGC--ATTTGCTTGGTGTACTTTCCGGTCGACGGGCCAGCATCAGTTTTGACCGCGGGATA
AA-GGCAGAGGGAATGTGGCTCCT----CCGGGAGTGTTATAGCCCTTCGTCAGATGTCGCGGTTGGGACTGAGGAACTC
A-GCACGCCTTTAT---GG-CCGGGG-TTCGCCCACGTA--CGTGCTTAGGATGCT-GGCGTAATGGCTTTAAACGACCC
GTCTTGAAACACGGACCAAGGAGTCTAACATGCCTGCGAGTGTTCGGGTGGAAAACCCGTGCGCGTAATGAAAGTGAAAG
TTGGGATCCCTGTCGTGGGGTGCACCGACGCCCGGACCAGACCTTCTGTGACGGATCTGCGGTAGAGCATGTATGTTGGG
ACCCGAAAGATGGTGAACTATGCCTGAATAGGGTGAAGCCAGAGGAAACTCTGGTGGAGGCTCGTAGCGATTCTGACGTG
CAAATCGATCGTCAAATTTGGGTATAGGGGCGAAAGACTAATCGA
>33_C_heimii_CBS32166                  
????????????????????????????????????????????????????????????????????????????????
????????????????????????????????????????????????????????????????????????????????
????????????????????????????????????????????????????????????????????????????????
????????????????????????????????????????????????????????????????????????????????
????????????????????????????????????????????????????????????????????????????????
????????????????????????????????????????????????????????????????????????????????
????????????????????????????????????????????????????????????????????????????????
????????????????????????????????????????????????????????????????????????????????
?????????????????????????????????CCCCTAGTAACTGCGAGTGAAGCGGGAAAAGCTCAAATTTAAAATCT
GGCGGTCTCC-GGCCGTCCGAGTTGTAGTCTGGAGAAGCGTTTTCCGCGCTAGACCGTGTACAAGTCTCCTGGAACGGAG
CGTCATAGAGGGTGAGAATCCCGTCTTTGACACGGACCCT-AGTGCTTTGTGATGCGCTCTCAAAGAGTCGAGTTGTTTG
GGAATGCAGCTCAAAATGGGTGGTGAATTCCATCTAAAGCTAAATATTGGCGAGAGACCGATAGCGAACAAGTACCGTGA
GGGAAAGATGAAAAGCACTTTGGAAAGAGAGTTAAACAGTACGTGAAATTGTTGAAAGGGAAACGCTTGAAGTCAGTCGC
GTCGGCCGGGACTCAGCCTTGC--ATTTGCTTGGTGTACTTTCCGGTCGACGGGCCAGCATCAGTTTTGACCGCGGGATA
AA-GGTAGAGGGAATGTGGCTCCC----CCGGGAGTGTTATAGCCCTCTGTCAGATGTCGCGGTTGGGACTGAGGAACTC
A-GCACGCCTTTAT---GG-CCGGGG-TTCGCCCACGTA--CGTGCTTAGGATGCT-GGCGTAATGGCTTTAAACGACC-
GTCTTGAAACACGGACCAAGGAGTCTAACATGCCTGCGAGTGTTCGGGTGGAAAACCCGTGCGCGTAATGAAAGTGAAAG
TTGGGATCCCTGTCGTGGGGTGCACCGACGCCCGGACCAGACCTTCTGTGACGGATCTGCGGTAGAGCATGTATGTTGGG
ACCCGAAAGATGGTGAACTATGCCTGAATAGGGTGAAGCCAGAGGAAACTCTGGTGGAGGCTCGTAGCGATTCTGACGTG
CAAATCGATCGTCAAATTTGGGTATAGGGGCGAAAGACTAATCGA
>106_G_flammea_CBS32466_T              
????????????????????????????????????????????????????????????????????????????????
????????????????????????????????????????????????????????????????????????????????
????????????????????????????????????????????????????????????????????????????????
????????????????????????????????????????????????????????????????????????????????
????????????????????????????????????????????????????????????????????????????????
????????????????????????????????????????????????????????????????????????????????
????????????????????????????????????????????????????????????????????????????????
????????????????????????????????????????????????????????????????????????????????
?????????????????????????????????CCCCTAGTAACTGCGAGTGAAGCGGGAAAAGCTCAAATTTAAAATCT
GGCGGTCTCC-GGCCGTCCGAGTTGTAGTCTGGAGAAGCGTCTTCCGCGTTGGACCGTGTACAAGTCTCCTGGAACGGAG
CGTCATAGAGGGTGAGAATCCCGTCTTTGACACGGACCCC-AGTGCTCTGTGATGCGCTCTCAAAGAGTCGAGTTGTTTG
GGAATGCAGCTCAAAATGGGTGGTGAATTCCATCTAAAGCTAAATATTGGCGAGAGACCGATAGCGAACAAGTACCGTGA
GGGAAAGATGAAAAGCACTTTGGAAAGAGAGTTAAACAGTACGTGAAATTGTTGAAAGGGAAACGCTTGAAGTCAGTCGC
GTCGGCCGGGACTCAGCCTTGC--ATTCGCTTGGTGTACTTTCCGGTTGACGGGCCAGCATCAGTTTTGACCGCGGGATA
AA-GGCGAGGGGAATGTGGCTCTC----TCGGGAGTGTTATAGCCCTTTGTCAGATGTCGCGGTTGGGACTGAGGTACTC
A-GCACGCCTTTAT---GG-CCGGGG-TTCGCCCACGTA--CGTGCTTAGGATGCT-GGCGTAATGGCTTTAAACGACCC
GTCTTGAAACACGGACCAAGGAGTCTAACATGCCTGCGAGTGTTCGGGTGGAAAACCCGTGCGCGCAATGAAAGTGAAAG
TTGGGATCCCTGTCGTGGGGTGCACCGACGCCCGGACCAGACCTTCTGTGACGGATCTGCGGTAGAGCATGTATGTTGGG
ACCCGAAAGATGGTGAACTATGCCTGAATAGGGTGAAGCCAGAGGAAACTCTGGTGGAGGCTCGTAGCGATTCTGACGTG
CAAATCGATCGTCAAATTTGGGTATAGGGGCGAAAGACTAATCGA
>37_X_subpileatus_FP106735             
????????????????????????????????????????????????????????????????????????????????
????????????????????????????????????????????????????????????????????????????????
????????????????????????????????????????????????????????????????????????????????
????????????????????????????????????????????????????????????????????????????????
????????????????????????????????????????????????????????????????????????????????
????????????????????????????????????????????????????????????????????????????????
????????????????????????????????????????????????????????????????????????????????
????????????????????????????????????????????????????????????????????????????????
?????????????????????????????????CCCCTAGTAACTGCGAGTGAAGCGGGAAAAGCTCAAATTTAAAATCT
GGCGGTCTCT-GGCCGTCCGAGTTGTAGTCTGGAGAAGCGTTTTCCGCGTTGGACCGTGTACAAGTTTCCTGGAACGGAG
CGTCATAGAGGGTGAGAATCCCGTCTTTGACACGGATCCC-AATGCTTTGTGATGCGCTCTCAAAGAGTCGAGTTGTTTG
GGAATGCAGCTCAAAATGGGTGGTGAATTCCATCTAAAGCTAAATATTGGCGAGAGACCGATAGCGAACAAGTACCGTGA
GGGAAAGATGAAAAGCACTTTGGAAAGAGAGTTAAACAGTACGTGAAATTGTTGAAAGGGAAACGCTTGAAGTCAGTCGC
GTTGGCCGGGACTCAGCCTTGC--ATCAGCTTGGTGTACTTTCCGGTCGACGGGCCAGCATCAGTTTTGATCGCGGGATA
AA-GGTGGAGGGAATGTGGCTCTT----TCGGGAGTGTTATAGCCCTTCATCGGATGCCGTGGTTGGGACTGAGGAACTC
A-GCACGCCTTCAT---GG-CCGGGG-TTCGCCCACGTA--CGTGCTTAGGATGCT-GGCGTAATGGCTTTAAACGACCC
GTCT-GAAACACGGACCAAGGAGTCTAACATGCCTGCGAGTGTTCGGGTGGAAAACCCGTGCGCGTAATGAAAGTGAAAG
TTGGGATCCCTGTCGTGGGGTGCACCGACGCCCGGACCAGACCTTTTGTGACGGATCTGCGGTAGAGCATGTATGTTGGG
ACCCGAAAGATGGTGAACTATGCCTGAATAGGGTGAAGCCAGAGGAAACTCTGGTGGAGGCTCGTAGCGATTCTGACGTG
CAAATCGATCGTCAAATTTGGGTATAGGGGCGAAAGACTAATCGA
>38_X_frustulatus_He2231               
????????????????????????????????????????????????????????????????????????????????
????????????????????????????????????????????????????????????????????????????????
????????????????????????????????????????????????????????????????????????????????
????????????????????????????????????????????????????????????????????????????????
????????????????????????????????????????????????????????????????????????????????
????????????????????????????????????????????????????????????????????????????????
????????????????????????????????????????????????????????????????????????????????
????????????????????????????????????????????????????????????????????????????????
?????????????????????????????????CCCCTAGTAACTGCGAGTGAAGCGGGAAAAGCTCAAATTTAAAATCT
GGCGGTCTCT-GGCCGTCCGAGTTGTAGTCTGGAGAAGCGTTTTCCGCGTTGGACCGTGTACAAGTTTCCTGGAACGGAG
CGTCATAGAGGGTGAGAATCCCGTCTTTGACACGGATCCC-AATGCTTTGTGATGCGCTCTCAAAGAGTCGAGTTGTTTG
GGAATGCAGCTCAAAATGGGTGGTGAATTCCATCTAAAGCTAAATATTGGCGAGAGACCGATAGCGAACAAGTACCGTGA
GGGAAAGATGAAAAGCACTTTGGAAAGAGAGTTAAACAGTACGTGAAATTGTTGAAAGGGAAACGCTTGAAGTCAGTCGC
GTTGGCCGGGACTCAGCCTTGC--ATCAGCTTGGTGTACTTTCCGGTCGACGGGCCAGCATCAGTTTTGACCGCGGGATA
AA-GGTGAAGGGAATGTGGCTCTT----TCGGGAGTGTTATAGCCCTTTGTCGGATGCCGTGGTTGGGACTGAGGAACTC
A-GCACGCCTTTAT---GG-CCGGGG-TTCGCCCACGTA--CGTGCTTAGGATGCT-GGCGTAATGGCTTTAAACGACCC
GTCTTGAAACACGGACCAAGGAGTCTAACATGCCTGCGAGTGTTCGGGTGGAAAACCCGTGCGCGTAATGAAAGTAAAAG
TTGGGATCCCTGTCGTGGGGTGCACCGACGCCCGGACCAGACCTTTTGTGACGGATCTGCGGTAGAGCATGTATGTTGGG
ACCCGAAAGATGGTGAACTATGCCTGAATAGGGTGAAGCCAGAGGAAACTCTGGTGGAGGCTCGTAGCGATTCTGACGTG
CAAATCGATCGTCAAATTTGGGTATAGGGGCGAAAGACTAATCGA
>39_A_lividocaeruleum_MB1825           
????????????????????????????????????????????????????????????????????????????????
????????????????????????????????????????????????????????????????????????????????
????????????????????????????????????????????????????????????????????????????????
????????????????????????????????????????????????????????????????????????????????
????????????????????????????????????????????????????????????????????????????????
????????????????????????????????????????????????????????????????????????????????
????????????????????????????????????????????????????????????????????????????????
????????????????????????????????????????????????????????????????????????????????
?????????????????????????????????CCCCTAGTAACTGCGAGTGAAGCGGGAAAAGCTCAAATTTAAAATCT
GGCGGTCTCT-GGCCGTCCGAGTTGTAGTCTGGAGAAGCGTTTTCCGCGTTGGACCGTGTACAAGTTTCCTGGAACGGAG
CGTCATAGAGGGTGAGAATCCCGTCTTTGACACGGATCCC-AATGCTTTGTGATGCGCTCTCAAAGAGTCGAGTTGTTTG
GGAATGCAGCTCAAAATGGGTGGTGAATTCCATCTAAAGCTAAATATTGGCGAGAGACCGATAGCGAACAAGTACCGTGA
GGGAAAGATGAAAAGCACTTTGGAAAGAGAGTTAAACAGTACGTGAAATTGTTGAAAGGGAAACGCTTGAAGTCAGTCGC
GTCGGCCGGGACTCAGCCTTGC--ATCAGCTTGGTGTACTTTCCGGTCGACGGGCCAGCATCAGTTTTGACCGCGGGATA
AA-GGCGGAGGGAATGTGGCTCTT----TCGGGAGTGTTATAGCCCTTCGTCGGATGCCGTGGTTGGGACTGAGGAACTC
A-GCACGCCTTTAT---GG-CCGGGG-TTCGCCCACGTA--CGTGCTTAGGATGCT-GGCGTAATGGCTTTAAACGACCC
GTCTTGAAACACGGACCAAGGAGTCTAACATGCCTGCGAGTGTTCGGGTGGAAAACCCGTGCGCGTAATGAAAGTGAAAG
TTGGGATCCCTGTCGTGGGGTGCACCGACGCCCGGACCAGACCTTTTGTGACGGATCTGCGGTAGAGCATGTATGTTGGG
ACCCGAAAGATGGTGAACTATGCCTGAATAGGGTGAAGCCAGAGGAAACTCTGGTGGAGGCTCGTAGCGATTCTGACGTG
CAAATCGATCGTCAAATTTGGGTATAGGGGCGAAAGACTAATCGA
>34_G_triste_KHL10334                  
????????????????????????????????????????????????????????????????????????????????
????????????????????????????????????????????????????????????????????????????????
????????????????????????????????????????????????????????????????????????????????
????????????????????????????????????????????????????????????????????????????????
????????????????????????????????????????????????????????????????????????????????
????????????????????????????????????????????????????????????????????????????????
????????????????????????????????????????????????????????????????????????????????
????????????????????????????????????????????????????????????????????????????????
?????????????????????????????????CCCCTAGTAACTGCGAGTGAAGCGGGAAAAGCTCAAATTTAAAATCT
GGCGGTCTCC-GGCCGTCCGAGTTGTAGTCTGGAGAAGCGTTTTCCGCGTTGGACCGTGTACAAGTCTCCTGGAACGGAG
CGTCATAGAGGGTGAGAATCCCGTCTTTGACACGGACCCC-AGTGCTCTGTGATGCGCTCTCAAAGAGTCGAGTTGTTTG
GGAATGCAGCTCAAAATGGGTGGTGAATTCCATCTAAAGCTAAATATTGGCGAGAGACCGATAGCGAACAAGTACCGTGA
GGGAAAGATGAAAAGCACTTTGGAAAGAGAGTTAAACAGTACGTGAAATTGTTGAAAGGGAAACGCTTGAAGTCAGTCGC
GTCGGCCGGGACTCAGCCTTGC--ATTCGCTTGGTGTACTTTCCGGTCGACGGGCCAGCATCAGTTTTGACCGCGGGATA
AA-GGCGAGGGGAATGTGGCTCTT----TCGGGAGTGTTATAGCCCTTTGTCAGATGTCGCGGTTGGGACTGAGGTACTC
A-GCACGCCTTTAT---GG-CCGGGG-TTCGCCCACGTA--CGTGCTTAGGATGCT-GGCGTAATGGCTTTAAACGACCC
GTCTTGAAACACGGACCAAGGAGTCTAACATGCCTGCGAGTGTTCGGGTGGAAAACCCGTGCGCGCAATGAAAGTGAAAG
TTGGGATCCCTGTCGTGGGGTGCACCGACGCCCGGACCAGACCTTCTGTGACGGATCTGCGGTAGAGCATGTATGTTGGG
ACCCGAAAGATGGTGAACTATGCCTGAATAGGGTGAAGCCAGAGGAAACTCTGGTGGAGGCTCGTAGCGATTCTGACGTG
CAAATCGATCGTCAAATTTGGGTATAGGGGCGAAAGACTAATCGA
>46_A_dextrinoideophyses_BJFC_He4078_T 
????????????????????????????????????????????????????????????????????????????????
????????????????????????????????????????????????????????????????????????????????
????????????????????????????????????????????????????????????????????????????????
????????????????????????????????????????????????????????????????????????????????
????????????????????????????????????????????????????????????????????????????????
????????????????????????????????????????????????????????????????????????????????
????????????????????????????????????????????????????????????????????????????????
????????????????????????????????????????????????????????????????????????????????
?????????????????????????????????-CCCTAGTAACTGCGAGTGAAGCGGGAAAAGCTCAAATTTAAAATCT
GGCGGTCTCC-GGCCGTCCGAGTTGTAGTCTGGAGAAGCGTTTTCCGCGTTGGACCGTGTACAAGTTTCCTGGAACGGAG
CGTCATAGAGGGTGAGAATCCCGTCTTTGACACGGACCCC-AATGCTTTGTGATGCGCTCTCAAAGAGTCGAGTTGTTTG
GGAATGCAGCTCAAAATGGGTGGTGAATTCCATCTAAAGCTAAATATTGGCGAGAGACCGATAGCGAACAAGTACCGTGA
GGGAAAGATGAAAAGCACTTTGGAAAGAGAGTTAAACAGTACGTGAAATTGTTGAAAGGGAAACGCTTGAAGTCAGTCGC
GTCGGCCGGGACTCAGCCTTGC--ATTCGCTTGGTGTACTTTCCGGTCGACGGGCCAGCATCAGTTTTGACCGCGAGACA
AA-GGCGGAGGGAATGTGGCTCTT----TCGGGAGTGTTATAGCCCTCCGTCGCATGTCGCGGTCGGGACTGAGGATCGC
A-GCACGCCTTTAT---GG-CCGGGG-TTCGCCCACGTA--CGTGCTTAGGATGCT-GGCGTAATGGCTTTAAACGACCC
GTCTTGAAACACGGACCAAGGAGTCTAACATGCCTGCGAGTGTTCGGGTGGAAAACCCGTGCGCGTAATGAAAGTGAAAG
TTGGGATCCCTGTCGTGGGGTGCACCGACGCCCGGACCAGACCTTTTGTGACGGATCTGCGGTAGAGCATGTATGTTGGG
ACCCGAAAGATGGTGAACTATGCCTGAATAGGGTGAAGCCAGAGGAAACTCTGGTGGAGGCTCGTAGCGATTCTGACGTG
CAAATCGATCGTCAAATTTGGGTATAGGGGCGAAAGACTAATCGA
>47_A_dextrinoideophyses_He4105        
????????????????????????????????????????????????????????????????????????????????
????????????????????????????????????????????????????????????????????????????????
????????????????????????????????????????????????????????????????????????????????
????????????????????????????????????????????????????????????????????????????????
????????????????????????????????????????????????????????????????????????????????
????????????????????????????????????????????????????????????????????????????????
????????????????????????????????????????????????????????????????????????????????
????????????????????????????????????????????????????????????????????????????????
?????????????????????????????????---CTAGTAACTGCGAGTGAAGCGGGAAAAGCTCAAATTTAAAATCT
GGCGGTCTCC-GGCCGTCCGAGTTGTAGTCTGGAGAAGCGTTTTCCGCGTTGGACCGTGTACAAGTTTCCTGGAACGGAG
CGTCATAGAGGGTGAGAATCCCGTCTTTGACACGGACCCC-AATGCTTTGTGATGCGCTCTCAAAGAGTCGAGTTGTTTG
GGAATGCAGCTCAAAATGGGTGGTGAATTCCATCTAAAGCTAAATATTGGCGAGAGACCGATAGCGAACAAGTACCGTGA
GGGAAAGATGAAAAGCACTTTGGAAAGAGAGTTAAACAGTACGTGAAATTGTTGAAAGGGAAACGCTTGAAGTCAGTCGC
GTCGGCCGGGACTCAGCCTTGC--ATTCGCTTGGTGTACTTTCCGGTCGACGGGCCAGCATCAGTTTTGACCGCGAGACA
AA-GGCGGAGGGAATGTGGCTCTT----TCGGGAGTGTTATAGCCCTCCGTCGCATGTCGCGGTCGGGACTGAGGATCGC
A-GCACGCCTTTAT---GG-CCGGGG-TTCGCCCACGTA--CGTGCTTAGGATGCT-GGCGTAATGGCTTTAAACGACCC
GTCTTGAAACACGGACCAAGGAGTCTAACATGCCTGCGAGTGTTCGGGTGGAAAACCCGTGCGCGTAATGAAAGTGAAAG
TTGGGATCCCTGTCGTGGGGTGCACCGACGCCCGGACCAGACCTTTTGTGACGGATCTGCGGTAGAGCATGTATGTTGGG
ACCCGAAAGATGGTGAACTATGCCTGAATAGGGTGAAGCCAGAGGAAACTCTGGTGGAGGCTCGTAGCGATTCTGACGTG
CAAATCGATCGTCAAATTTGGGTATAGGGGCGAAAGACTAATCGA
>48_A_laurentianus_HHB11235            
????????????????????????????????????????????????????????????????????????????????
????????????????????????????????????????????????????????????????????????????????
????????????????????????????????????????????????????????????????????????????????
????????????????????????????????????????????????????????????????????????????????
????????????????????????????????????????????????????????????????????????????????
????????????????????????????????????????????????????????????????????????????????
????????????????????????????????????????????????????????????????????????????????
????????????????????????????????????????????????????????????????????????????????
?????????????????????????????????CCCCTAGTAACTGCGAGTGAAGCGGGAAAAGCTCAAATTTAAAATCT
GGCGGTCTCC-GGCCGTCCGAGTTGTAGTCTGGAGAAGCGTTTTCCGCGTTGGACCGTGTACAAGTTTCCTGGAACGGAG
CGTCATAGAGGGTGAGAATCCCGTCTTTGACACGGACCCC-AATGCTTTGTGATGCGCTCTCAAAGAGTCGAGTTGTTTG
GGAATGCAGCTCAAAATGGGTGGTGAATTCCATCTAAAGCTAAATATTGGCGAGAGACCGATAGCGAACAAGTACCGTGA
GGGAAAGATGAAAAGCACTTTGGAAAGAGAGTTAAACAGTACGTGAAATTGTTGAAAGGGAAACGCTTGAAGTCAGTCGC
GTCGGCCGGGACTCAGCCTTGC--ATTTGCTTGGTGTACTTTCCGGTCGACGGGCCAGCATCAGTTTTGACCGCGAGACA
AA-GGCGGAGGGAATGTGGCTCTT----TCGGGAGTGTTATAGCCCTCCGTCGCATGTCGCGGTTGGGACTGAGGACCGC
A-GCACGCCTTTAT---GG-CCGGGG-TTCGCCCACGTA--CGTGCTTAGGATGCTTGGCGTAATGGCTTTAAACGACCC
GTCTTGAAACACGGACCAAGGAGTCTAACATGCCTGCGAGTGTTCGGGTGGAAAACCCGTGCGCGTAATGAAAGTGAAAG
TTGGGATCCCTGTCGTGGGGTGCACCGACGCCCGGACCAGACCTTTTGTGACGGATCTGCGGTAGAGCATGTATGTTGGG
ACCCGAAAGATGGTGAACTATGCCTGAATAGGGTGAAGCCAGAGGAAACTCTGGTGGAGGCTCGTAGCGATTCTGACGTG
CAAATCGATCGTCAAATTTGGGTATAGGGGCGAAAGACTAATCGA
>51_A_botryosus_Wu9302_61              
????????????????????????????????????????????????????????????????????????????????
????????????????????????????????????????????????????????????????????????????????
????????????????????????????????????????????????????????????????????????????????
????????????????????????????????????????????????????????????????????????????????
????????????????????????????????????????????????????????????????????????????????
????????????????????????????????????????????????????????????????????????????????
????????????????????????????????????????????????????????????????????????????????
????????????????????????????????????????????????????????????????????????????????
?????????????????????????????????CCCCTAGTAACTGCGAGTGAAGCGGGAAAAGCTCAAATTTAAAATCT
GGCGGTCTCC-GGCCGTCCGAGTTGTAGTCTGGAGAAGCGTTTTCCGCGTTGGACCGTGTACAAGTTTCCTGGAACGGAG
CGTCATAGAGGGTGAGAATCCCGTCTTTGACACGGACCCC-AATGCTTTGTGATGCGCTCTCAAAGAGTCGAGTTGTTTG
GGAATGCAGCTCAAAATGGGTGGTGAATTCCATCTAAAGCTAAATATTGGCGAGAGACCGATAGCGAACAAGTACCGTGA
GGGAAAGATGAAAAGCACTTTGGAAAGAGAGTTAAACAGTACGTGAAATTGTTGAAAGGGAAACGCTTGAAGTCAGTCGC
GTCTGCCGGGACTCAGCCTTGC--TTCCGCTAGGTGTACTTTCCGGTAGACGGGCCAGCATCAGTTTTGGCCGCGAGAAA
AA-GGCGGAGGGAATGTGGCTCTT----TCGGGAGTGTTATAGCCCTCTGTCACATGTCGCGGCTGGGACTGAGGACCGC
A-GCACGCCTTTAT---GG-CCGGGG-TTCGCCCACGTA--CGTGCTTAGGATGCT-GGCGTAATGGCTTTAAACGACCC
GTCTTGAAACACGGACCAAGGAGTCTAACATGCCTGCGAGTGTTCGGGTGGAAAACCCGTGCGCGTAATGAAAGTGAAAG
TTGGGATCCCTGTCGTGGGGTGCACCGACGCCCGGACCAGACCTTTTGTGACGGATCTGCGGTAGAGCATGTATGTTGGG
ACCCGAAAGATGGTGAACTATGCCTGAATAGGGTGAAGCCAGAGGAAACTCTGGTGGAGGCTCGTAGCGATTCTGACGTG
CAAATCGATCGTCAAATTTGGGTATAGGGGCGAAAGACTAATCGA
>44_A_dextrinoideocerussatus_EL2597    
????????????????????????????????????????????????????????????????????????????????
????????????????????????????????????????????????????????????????????????????????
????????????????????????????????????????????????????????????????????????????????
????????????????????????????????????????????????????????????????????????????????
????????????????????????????????????????????????????????????????????????????????
????????????????????????????????????????????????????????????????????????????????
????????????????????????????????????????????????????????????????????????????????
????????????????????????????????????????????????????????????????????????????????
?????????????????????????????????CCCCTAGTAACTGCGAGTGAAGCGGGAAAAGCTCAAATTTAAAATCT
GGCGGTCTCC-GGCCGTCCGAGTTGTAGTCTGGAGAAGCGTTTTCCGCGTTGGACCGTGTACAAGTTTCCTGGAACGGAG
CGTCATAGAGGGTGAGAATCCCGTCTTTGACACGGACCCC-AATGCTTTGTGATGCGCTCTCAAAGAGTCGAGTTGTTTG
GGAATGCAGCTCAAAATGGGTGGTGAATTCCATCTAAAGCTAAATATTGGCGAGAGACCGATAGCGAACAAGTACCGTGA
GGGAAAGATGAAAAGCACTTTGGAAAGAGAGTTAAACAGTACGTGAAATTGTTGAAAGGGAAACGCTTGAAGTCAGTCGC
GTCGGCCGGGACTCAGCCTTGC--ATTCGCTTGGTGTACTTTCCGGTCGACGGGCCAGCATCAGTTTTGACCGCGAGACA
AA-GGCGGAGGGAATGTGGCTCTT----TCGGGAGTGTTATAGCCCTTCGTCGCATGTCGCGGCTGGGACTGAGGACCGC
A-GCACGCCTTTAT---GG-CCGGGG-TTCGCCCACGTA--CGTGCTTAGGATGCT-GGCGTAATGGCTTTAAACGACC-
GTCTTGAAACACGGACCAAGGAGTCTAACATGCCTGCGAGTGTTCGGGTGGAAAACCCGTGCGCGCAATGAAAGTGAAAG
TTGGGATCCCTGTCGTGGGGTGCACCGACGCCCGGACCAGACCTTTTGTGACGGATCTGCGGTAGAGCATGTATGTTGGG
ACCCGAAAGATGGTGAACTATGCCTGAATAGGGTGAAGCCAGAGGAAACTCTGGTGGAGGCTCGTAGCGATTCTGACGTG
CAAATCGATCGTCAAATTTGGGTATAGGGGCGAAAGACTAATCGA
>59_A_bisporum_T627                    
????????????????????????????????????????????????????????????????????????????????
????????????????????????????????????????????????????????????????????????????????
????????????????????????????????????????????????????????????????????????????????
????????????????????????????????????????????????????????????????????????????????
????????????????????????????????????????????????????????????????????????????????
????????????????????????????????????????????????????????????????????????????????
????????????????????????????????????????????????????????????????????????????????
????????????????????????????????????????????????????????????????????????????????
?????????????????????????????????CCCCTAGTAACTGCGAGTGAAGCGGGAAAAGCTCAAATTTAAAATCT
GGCGGTCTTCTGGCCGTCCGAGTTGTAGTCTGGAGAAGCGTTTTCCGCGTTGGACCGTGTACAAGTTTCCTGGAACGGAG
CGTCATAGAGGGTGAGAATCCCGTCTTTGACACGGACCCC-AATGCTTTGTGATGCGCTCTCAAAGAGTCGAGTTGTTTG
GGAATGCAGCTCAAAATGGGTGGTGAATTCCATCTAAAGCTAAATATTGGCGAGAGACCGATAGCGAACAAGTACCGTGA
GGGAAAGATGAAAAGCACTTTGGAAAGAGAGTTAAACAGTACGTGAAATTGTTGAAAGGGAAACGCTTGAAGTCAGTCGC
GTTGGCCGGGACTCAGCCTTGC--ATCCGCTTGGTGTACTTTCCGGTTGACGGGCCAGCATCAGTTTTGATCGAGAGACA
AA-G-CGGGGGGAATGTGGCTCTT----TCGGGAGTGTTATAGTCCTTCGTCAGATGTCTCGGTTGGGACTGAGGTACTC
A-GCACGCCTTTAT---GG-CCGGGG-TTCGCCCACGTA--CGTGCTTAGGATGCT-GGCGTAATGGCTTTAAACGACCC
GTCTTGAAACACGGACCAAGGAGTCTAACATGCCTGCGAGTGTTCGGGTGGAAAACCCGTGCGCGTAATGAAAGTGAAAG
TTGGGATCCCTGTCGTGGGGTGCACCGACGCCCGGCCCAGACCTTTTGTGACGGAGCTGCGGTAGAGCATGTATGTTGGG
ACCCGAAAGATGGTGAACTATGCCTGAATAGGGTGAAGCCAGAGGAAACTCTGGTGGAGGCTCGTAGCGATTCTGACGTG
CAAATCGATCGTCAAATTTGGGTATAGGGGCGAAAGACTAATCGA
>58_A_bisporum_T614                    
????????????????????????????????????????????????????????????????????????????????
????????????????????????????????????????????????????????????????????????????????
????????????????????????????????????????????????????????????????????????????????
????????????????????????????????????????????????????????????????????????????????
????????????????????????????????????????????????????????????????????????????????
????????????????????????????????????????????????????????????????????????????????
????????????????????????????????????????????????????????????????????????????????
????????????????????????????????????????????????????????????????????????????????
?????????????????????????????????CCCCTAGTAACTGCGAGTGAAGCGGGAAAAGCTCAAATTTAAAATCT
GGCGGTCTTCTGGCCGTCCGAGTTGTAGTCTGGAGAAGCGTTTTCCGCGTTGGACCGTGTACAAGTTTCCTGGAACGGAG
CGTCATAGAGGGTGAGAATCCCGTCTTTGACACGGACCCC-AATGCTTTGTGATGCGCTCTCAAAGAGTCGAGTTGTTTG
GGAATGCAGCTCAAAATGGGTGGTGAATTCCATCTAAAGCTAAATATTGGCGAGAGACCGATAGCGAACAAGTACCGTGA
GGGAAAGATGAAAAGCACTTTGGAAAGAGAGTTAAACAGTACGTGAAATTGTTGAAAGGGAAACGCTTGAAGTCAGTCGC
GTTGGCCGGGACTCAGCCTTGC--ATCCGCTTGGTGTACTTTCCGGTTGACGGGCCAGCATCAGTTTTGATCGAGAGACA
AA-GGCGGGGGGAATGTGGCTCTT----TCGGGAGTGTTATAGTCCTTCGTCAGATGTCTCGGTTGGGACTGAGGTACTC
A-GCACGCCTTTAT---GG-CCGGGG-TTCGCCCACGTA--CGTGCTTAGGATGCT-GGCGTAATGGCTTTAAACGACCC
GTCTTGAAACACGGACCAAGGAGTCTAACATGCCTGCGAGTGTTCGGGTGGAAAACCCGTGCGCGTAATGAAAGTGAAAG
TTGGGATCCCTGTCGTGGGGTGCACCGACGCCCGGCCCAGACCTTTTGTGACGGAGCTGCGGTAGAGCATGTATGTTGGG
ACCCGAAAGATGGTGAACTATGCCTGAATAGGGTGAAGCCAGAGGAAACTCTGGTGGAGGCTCGTAGCGATTCTGACGTG
CAAATCGATCGTCAAATTTGGGTATAGGGGCGAAAGACTAATCGA
>60_A_rimosus_Wu9601_1                 
????????????????????????????????????????????????????????????????????????????????
????????????????????????????????????????????????????????????????????????????????
????????????????????????????????????????????????????????????????????????????????
????????????????????????????????????????????????????????????????????????????????
????????????????????????????????????????????????????????????????????????????????
????????????????????????????????????????????????????????????????????????????????
????????????????????????????????????????????????????????????????????????????????
????????????????????????????????????????????????????????????????????????????????
?????????????????????????????????CCCCTAGTAACTGCGAGTGAAGCGGGAAAAGCTCAAATTTGAAATCT
GGCGGTCTCC-GGCCGTCCGAGTTGTAGTCTGGAGAAGCGTTTTCCGCGTTGGACCGTGTACAAGTTTCCTGGAACGGAG
CGTCATAGAGGGTGAGAATCCCGTCTTTGACACGGACCCC-AATGCTTTGTGATGCGCTCTCAAAGAGTCGAGTTGTTTG
GGAATGCAGCTCAAAATGGGTGGTGAATTCCATCTAAAGCTAAATATTGGCGAGAGACCGATAGCGAACAAGTACCGTGA
GGGAAAGATGAAAAGCACTTTGGAAAGAGAGTTAAACAGTACGTGAAATTGTTGAAAGGGAAACGCTTGAAGTCAGTCGC
GTCGACCGGGACTCAGCCTTGC--ATTCGCTTGGTGTACTTTCCGGTTGACGGGCCAGCATCAGTTTTGACCGCGAGATA
AA-GGTGGGGGGAATGTGGCTCTT----TCGGGAGTGTTATAGCCCTTTGTCAGATGTCGCGGTTGGGACTGAGGAACTC
A-GCACGCCTTTAT---GG-CCGGGG-TCCGCCCACGTA--CGTGCTTAGGATGCT-GGCGTAATGGCTTTAAACGACCC
GTCTTGAAACACGGACCAAGGAGTCTAACATGCCTGCGAGTGTTCGGGTGGAAAACCCGTGCGCGTAATGAAAGTGAAAG
TTGGGATCCCTGTCGTGGGGTGCACCGACGCCCGGCCCAGACCTTTTGTGACGGAGCTGCGGTAGAGCATGTATGTTGGG
ACCCGAAAGATGGTGAACTATGCCTGAATAGGGTGAAGCCAGAGGAAACTCTGGTGGAGGCTCGTAGCGATTCTGACGTG
CAAATCGATCGTCAAATTTGGGTATAGGGGCGAAAGACTAATCGA
>62_A_abietis_T330                     
????????????????????????????????????????????????????????????????????????????????
????????????????????????????????????????????????????????????????????????????????
????????????????????????????????????????????????????????????????????????????????
????????????????????????????????????????????????????????????????????????????????
????????????????????????????????????????????????????????????????????????????????
????????????????????????????????????????????????????????????????????????????????
????????????????????????????????????????????????????????????????????????????????
????????????????????????????????????????????????????????????????????????????????
?????????????????????????????????CCCCTAGTAACTGCGAGTGAAGCGGGAAAAGCTCAAATTTAAAATCT
GGCGGTCTCC-GGCCGTCCGAGTTGTAGTCTGGAGAAGCGTTTTCCGCGTTGGACCGTGTACAAGTTTCCTGGAACGGAG
CGTCATAGAGGGTGAGAATCCCGTCTTTGACACGGACCCC-AATGCTTTGTGATGCGCTCTCAAAGAGTCGAGTTGTTTG
GGAATGCAGCTCAAAATGGGTGGTGAATTCCATCTAAAGCTAAATATTGGCGAGAGACCGATAGCGAACAAGTACCGTGA
GGGAAAGATGAAAAGCACTTTGGAAAGAGAGTTAAACAGTACGTGAAATTGTTGAAAGGGAAACGCTTGAAGTCAGTCGC
GTCGGCCGGGACTCAGCCTTTA--------CTGGTGTACTTTCCGGTCGATGGGCCAGCATCAGTTTTGACCGCGAGATA
AA-GGCGTCGGGAATGTGGCTCTT----TCGGGAGTGTTATAGCCCTTCGTCACATGTCGCGGTCGGGACTGAGGAATTC
A-GCACGCCTTTAT---GG-CCGGGG-TTCGCCCACGTA--CGTGCTTAGGATGCT-GGCGTAATGGCTTTAAACGACCC
GTCTTGAAACACGGACCAAGGAGTCTAACATGCCTGCGAGTGTTCGGGTGGAAAACCCGTGCGCGTAATGAAAGTGAAAG
TTGGGATCCCTGTCGTGGGGTGCACCGACGCCCGGACCAGACCTTCTGTGACGGCTCCGCGGTAGAGCATGTATGTTGGG
ACCCGAAAGATGGTGAACTATGCCTGAATAGGGTGAAGCCAGAGGAAACTCTGGTGGAGGCTCGTAGCGATTCTGACGTG
CAAATCGATCGTCAAATTTGGGTATAGGGGCGAAAGACTAATCGA
>69_A_penicillatus_T322                
????????????????????????????????????????????????????????????????????????????????
????????????????????????????????????????????????????????????????????????????????
????????????????????????????????????????????????????????????????????????????????
????????????????????????????????????????????????????????????????????????????????
????????????????????????????????????????????????????????????????????????????????
????????????????????????????????????????????????????????????????????????????????
????????????????????????????????????????????????????????????????????????????????
????????????????????????????????????????????????????????????????????????????????
?????????????????????????????????CCCCTAGTAACTGCGAGTGAAGCGGGAAAAGCTCAAATTTAAAATCT
GGCGGTTTC--GGCCGTCCGAGTTGTAATCTGGAGAAGTGTTTTCCGCGTTGGACCGTGTACAAGTTTCCTGGAACGGAG
CGTCATAGAGGGTGAGAATCCCGTCTTTGACACGGACCCC-AATGCTTTGTGATACACTCTCAAAGAGTCGAGTTGTTTG
GGAATGCAGCTCAAAATGGGTGGTGAATTCCATCTAAAGCTAAATATTGGCGAGAGACCGATAGCGAACAAGTACCGTGA
GGGAAAGATGAAAAGCACTTTGGAAAGAGAGTTAAACAGTACGTGAAATTGTTGAAAGGGAAACGCTTGAAGTCAGTCGC
GTTGGCCGGGACTCAGCCTTGC--ATTCGCTCGGTGTATTTTCCGGTCGACGGGCCAGCATCAATTTTGACCGCGGGATA
AA-GTCTGGAGGAAGGTGGCTCT-----TC-GGAGTGTTATAGCCTCCGGTCGCATGCCGCGGTTGGGATTGAGGAATTC
A-GCACGCCTTTGATTAGGTTCGGGG-TTCGCCCACGTT--CGTGCTTAGGATGCT-GGCGTAATGGCTTTAAACGGCCC
GTCTTGAAACACGGACCAAGGAGTCTAACATGCCTGCGAGTGTTCGGGTGGAAAACCCGTGCGCGTAATGAAAGTGAAAG
TTGGGATCCCTGTCGTGGGGTGCACCGACGCCCGGACCAGAACTTCTGTGACGGATCTGCGGTAGAGCATGTATGTTGGG
ACCCGAAAGATGGTGAACTATGCCTGAATAGGGTGAAGCCAGAGGAAACTCTGGTGGAGGCTCGTAGCGATTCTGACGTG
CAAATCGATCGTCAAATTTGGGTATAGGGGCGAAAGACTAATCGA
>70_A_penicillatus_HHB_13223           
????????????????????????????????????????????????????????????????????????????????
????????????????????????????????????????????????????????????????????????????????
????????????????????????????????????????????????????????????????????????????????
????????????????????????????????????????????????????????????????????????????????
????????????????????????????????????????????????????????????????????????????????
????????????????????????????????????????????????????????????????????????????????
????????????????????????????????????????????????????????????????????????????????
????????????????????????????????????????????????????????????????????????????????
?????????????????????????????????CCCCTAGTAACTGCGAGTGAAGCGGGAAAAGCTCAAATTTAAAATCT
GGCGGTTTC--GGCCGTCCGAGTTGTAATCTGGAGAAGTGTTTTCCGCGTTGGACCGTGTACAAGTTTCCTGGAACGGAG
CGTCATAGAGGGTGAGAATCCCGTCTTTGACACGGACCCC-AAGGCTTTGTGATACACTCTCAAAGAGTCGAGTTGTTTG
GGAATGCAGCTCAAAATGGGTGGTGAATTCCATCTAAAGCTAAATATTGGCGAGAGACCGATAGCGAACAAGTACCGTGA
GGGAAAGATGAAAAGCACTTTGGAAAGAGAGTTAAACAGTACGTGAAATTGTTGAAAGGGAAACGCTTGAAGTCAGTCGC
GTTGGCCGGGACTCAGCCTTGC--ATTCGCTCGGTGTATTTTCCGGTCGACGGGCCAGCATCAATTTTGACCGCGGGATA
AA-GTCTGGAGGAAGGTGGCTCT-----TC-GGAGTGTTATAGCCTCCGGTCGCATGCCGCGGTTGGGATTGAGGAATTC
A-GCACGCCTTTGATTAGGTTCGGGG-TTCGCCCACGTT--CGTGCTTAGGATGCT-GGCGTAATGGCTTTAAACGACCC
GTCTTGAAACACGGACCAAGGAGTCTAACATGCCTGCGAGTGTTCGGGTGGAAAACCCGTGCGCGTAATGAAAGTGAAAG
TTGGGATCCCTGTCGTGGGGTGCACCGACGCCCGGACCAGAACTTCTGTGACGGATCTGCGGTAGAGCATGTATGTTGGG
ACCCGAAAGATGGTGAACTATGCCTGAATAGGGTGAAGCCAGAGGAAACTCTGGTGGAGGCTCGTAGCGATTCTGACGTG
CAAATCGATCGTCAAATTTGGGTATAGGGGCGAAAGACTAATCGA
>2_A_bernicchiae_MR12636               
CATTAACGAATTT-------GAAAG--GGGTTGTCGCTGGCCTT------CCGGGGCATGTGCACG--CCTCGA-TCTCA
TCC--T---TCTCACACCTGTGCACCTCTGCGTGGG-TCTGTCGGCCATCTG-----------GCCT--TCGGA------
---CCTGCG--TCCTTTT---CACAAACTCT---TGTATGTAAT---CAGAATGTCGCA-----ATGCTATAAACGCATC
TTATA----CAACTTTCAACAACGGATCTCTTGGCTCTCGCATCGATGAAGAACGCAGCGAAATGCGATAAGTAATGTGA
ATTGCAGAATTCAGTGAATCATCGAATCTTTGAACGCACCTTGCGCCCCTTGGTATTCCGAGGGGCACGCCTGTTTGAGT
GTCGTGATATTCTCAACTGGAGCC--CTTTCTTCGGAGGGGGCCT-----CAGATTGGACTTGGAGGC-CTT-GCCGGTC
CG----CCCTCGAGGTGG-TCGGCTCCTCTTGAATGCATTAGCG-GGGCCCTT--GC-GGTG--TCGC-CCTTGGTGTGA
TAATTGTCTACGCCGTGGGTGAAGCTG-CTGTAA---CATGGGGGACCCGCTTCCAACCG----TCTCCCCGTGTGGAGA
CACTTCATCGAACCTGACCTCAAAT-CAGGCGGCCCCTAGTAACTGCGAGTGAAGCGGGAAAAGCTCAAATTTAAAATCT
GGCGGTCTTT-GGCCGTCCGAGTTGTAGTCTGGAGAAGTGCTTTCCGCGCTGGACCGTGTACAAGTCTCCTGGAACGGAG
CGTCATAGAGGGTGAGAATCCCGTCTTTGACACGGACAACCAGTGCTATGTGATGCGCTCTCAAAGAGTCGAGTTGTTTG
GGAATGCAGCTCAAAATGGGTGGTGAATTCCATCTAAAGCTAAATATTGGCGAGAGACCGATAGCGAACAAGTACCGTGA
GGGAAAGATGAAAAGCACTTTGGAAAGAGAGTTAAACAGTACGTGAAATTGTTGAAAGGGAAACGATTGAAGTCAGTCGC
GTCGTCCGGAACTCAGCCTTGCAATCTTGCCTGGTGTACTTTCCGGTTGACGGGCCAGCATCAATTTTGACCGTCGGATA
AG-GGTGGGGGAAATGTGGCACCT----CCGGGTGTGTTATAGTCCTCCATCGTATACGGCGGTTGGGATTGAGGAACTC
A-GCATGCCTTTAC---GG-TCGGGG-TTCGCCCACGTT--CATGCTTAGGATGCT-GGCGTAATGGCTTTAAACGACCC
GTCTTGAAACACGGACCAAGGAGTCTAACATGCCCGCGAGTGTTTGGGTGGAAAACCCATGCGCGTAATGAAAGTAAAAG
TTGGGACCTCTGTCGTGGAGGGCACCGACGCCCGGACCAGAACTTCTGTGACGGATCTGCGGTAGAGCGTGTATGTTGGG
ACCCGAAAGATGGTGAACTATGCCTGAATAGGGTGAAGCCAGAGGAAACTCTGGTGGAGGCTCGTAGCGATTCTGACGTG
CAAATCGATCGTCAAATTTGGGTATAGGGGCGAAAGACTAATCGA
>4_A_bernicchiae_SPG3217               
CATTAACGAATTT-------GAAAG--GGGTTGTCGCTGGCCTT------CCGGGGCATGTGCACG--CCTCGA-TCTCA
TCC--T---TCTCACACCTGTGCACCTCTGCGTGGG-TCTGTCGGCCATCTG-----------GCCT--TCGGA------
---CCTGCG--TCCTTTT---CACAAACTCT---TGTATGTAAT---CAGAATGTCGCA-----ATGCTATAAACGCATC
TTATA----CAACTTTCAACAACGGATCTCTTGGCTCTCGCATCGATGAAGAACGCAGCGAAATGCGATAAGTAATGTGA
ATTGCAGAATTCAGTGAATCATCGAATCTTTGAACGCACCTTGCGCCCCTTGGTATTCCGAGGGGCACGCCTGTTTGAGT
GTCGTGATATTCTCAACTGGAGCC--CTTTCTTCGGAGGGGGCCT-----CAGATTGGACTTGGAGGC-CTT-GCCGGTC
CG----CCCTCGAGGTGG-TCGGCTCCTCTTGAATGCATTAGCG-GGGCCCTTT-GC-GGTG--TCGC-CCTTGGTGTGA
TAATTGTCTACGCCGTGGGTGAAGCTG-CTGTAA---CATGGGGGACCCGCTTCCAACCG----TCTCCCCGTGTGGAGA
CACTTCATCGAACCTGACCTCAAAT-CAGGCGACCCCTAGTAACTGCGAGTGAAGCGGGAAAAGCTCAAATTTAAAATCT
GGCGGTCTTT-GGCCGTCCGAGTTGTAGTCTGGAGAAGTGCTTTCCGCGCTGGACCGTGTACAAGTCTCCTGGAACGGAG
CGTCATAGAGGGTGAGAATCCCGTCTTTGACACGGACAACCAGTGCTATGTGATGCGCTCTCAAAGAGTCGAGTTGTTTG
GGAATGCAGCTCAAAATGGGTGGTGAATTCCATCTAAAGCTAAATATTGGCGAGAGACCGATAGCGAACAAGTACCGTGA
GGGAAAGATGAAAAGCACTTTGGAAAGAGAGTTAAACAGTACGTGAAATTGTTGAAAGGGAAACGATTGAAGTCAGTCGC
GTCGTCCGGAACTCAGCCTTGCAATCTTGCCTGGTGTACTTTCCGGTTGACGGGCCAGCATCAATTTTGACCGTCGGATA
AG-GGTGGGGGAAATGTGGCACCT----CCGGGTGTGTTATAGTCCTCCATCGTATACGGCGGTTGGGATTGAGGAACTC
A-GCATGCCTTTAC---GG-TCGGGG-TTCGCCCACGTT--CATGCTTAGGATGCT-GGCGTAATGGCTTTAAACGACCC
GTCTTGAAACACGGACCAAGGAGTCTAACATGCCCGCGAGTGTTTGGGTGGAAAACCCATGCGCGTAATGAAAGTAAAAG
TTGGGACCTCTGTCGTGGAGGGCACCGACGCCCGGACCAGAACTTCTGTGACGGATCTGCGGTAGAGCGTGTATGTTGGG
ACCCGAAAGATGGTGAACTATGCCTGAATAGGGTGAAGCCAGAGGAAACTCTGGTGGAGGCTCGTAGCGATTCTGACGTG
CAAATCGATCGTCAAATTTGGGTATAGGGGCGAAAGACTAATCGA
>5_A_subcruentatum_He2886              
CATTAACAAGTTT-------GGACG-GAGGTTGTCGCTGGCCCT------CAGGGGCATGTGCACG--CCTCCACTCTCA
CTT--CATCTCTCACACCTGTGCACCCTTGCGTGGGCCCACTGACCCCTTCAC-------GGGGGCCCTATGGG------
---CCTGCG--TTCTTTTT--CACAAACCCCCCATGTATGTCTT---CAGAATGTCGAA------TGCTATAAACGCATC
TTATA----CAACTTTCAACAACGGATCTCTTGGCTCTCGCATCGATGAAGAACGCAGCGAAATGCGATAAGTAATGTGA
ATTGCAGAATTCAGTGAATCATCGAATCTTTGAACGCACCTTGCGCCCCTTGGTATTCCGAGGGGCACGCCTGTCTGAGT
GTCGTTATATTCTCAACCAAGGCC--TCCTTTCGAGGTCGGACCT-----TGGCTTGGACTTGGAGGCTCTT-GCCGGCC
TTTGACCCTTCGGGGCGGGTCGGCTCCTCTTGAATGCATTAGTG-TGACCCTCTCGC-GGTCGTCCGC-CTCTGGCTTGA
TAATTGTCTATGCCGTTGGTGTGTCGGTCCGTGGGCTCATGTGGGCCTCGCTTCTAACCG----TCCTCTCG--GGGACA
GCTCCATCTACACTTGACCTCAGAT-CAGGCGGCCCCTAGTAACTGCGAGTGAAGCGGGAAAAGCTCAAATTTAAAATCT
GGCGGTCTTT-GGCCGTCCGAGTTGTAGTCTAGAGAAGTGCCTTCCGCGCTGGACCGTGTACAAGTCTCCTGGAACGGAG
CGTCGTAGAGGGTGAGAATCCCGTCTTTGACACGGACCGCCAGTGCTATGTGATGCGCTCTCTAAGAGTCGAGTTGTTTG
GGAATGCAGCTCAAAATGGGTGGTGAATTCCATCTAAAGCTAAATATTGGCGAGAGACCGATAGCGAACAAGTACCGTGA
GGGAAAGATGAAAAGCACTTTGGAAAGAGAGTTAAACAGTACGTGAAATTGTTGAAAGGGAAACGCTTGAAGTCAGTCGC
GTCGGCCGGGACTCAGCCTCGCAACCTTGCCTGGTGTACTTTCCGGTCGACGGGCCAGCATCAATTTTGACCGTCGGACA
AG-GGTGGGGGAAATGTGGCACCC----TCGGGTGTGTTATAGTCCCCCGTCGCATGCGTCGGTTGGGATTGAGGAACTC
A-GCACGCCTTTAC---GG-TCGGGG-TTCGCCCACGTT--CGTGCTTAGGATGCT-GGCGTAATGGCTTTAAACGACCC
GTCTTGAAACACGGACCAAGGAGTCTAACATGCCCGCGAGTGTTTGGGTGGAAAACCCATGCGCGTAATGAAAGTGAAAG
TTGGGACCTCTGTCGTGGAGGGCACCGACGCCCGGACCAGACCTTCTGTGACGGATCCGCGGTAGAGCGTGTATGTTGGG
ACCCGAAAGATGGTGAACTATGCCTGAATAGGGTGAAGCCAGAGGAAACTCTGGTGGAGGCTCGTAGCGATTCTGACGTG
CAAATCGATCGTCAAATTTGGGTATAGGGGCGAAAGACTAATCGA
>6_A_subcruentatum_HHB_17353           
CATTAACAAGTTT-------GAACG-GAGGTTGTCGCTGGCCCT------CAGGGGCATGTGCACG--CCTCCACTCTCA
CTT--CATCTCCCACACCTGTGCACCCTTGCGTGGGCCCACCGACCCCTTCAC-------GGGGGCTCTATGGG------
---CTCGCG--TCCTTTTT--CACAAACCCCCCATGTATGTCTT---CAGAATGTCGAA------TGCTATAAACGCATC
TTATA----CAACTTTCAACAACGGATCTCTTGGCTCTCGCATCGATGAAGAACGCAGCGAAATGCGATAAGTAATGTGA
ATTGCAGAATTCAGTGAATCATCGAATCTTTGAACGCACCTTGCGCCCCTTGGTATTCCGAGGGGCACGCCTGTCTGAGT
GTCGTTATATTCTCAACCAAGGTC--TCCTTTCGAGGTTGGACCT-----TGGCTTGGACTTGGAGGCTCTT-GCCGGCC
TTGACCCCTTCGGGGCGG-TCGGCTCCTCTTGAATGCATTAGTG-TGACCCTCTCGC-GGTCGTCCGC-CTCTGGCTTGA
TAATTGTCTATGCCGTTGGTGTGTCGGTCCGTGAGCTCATGTGGGCCTCGCTTCTAACCG----TCCTCTCG--GGGACA
GCTCCATCTACACTTGACCTCAGAT-CAGGCGGCCCCTAGTAACTGCGAGTGAAGCGGGAAAAGCTCAAATTTAAAATCT
GGCGGTCTTT-GGCCGTCCGAGTTGTAGTCTAGAGAAGTGCCTTCCGCGCTGGACCGTGTACAAGTCTCCTGGAACGGAG
CGTCGTAGAGGGTGAGAATCCCGTCTTTGACACGGACCGCCAGTGCTATGTGATGCGCTCTCTAAGAGTCGAGTTGTTTG
GGAATGCAGCTCAAAATGGGTGGTGAATTCCATCTAAAGCTAAATATTGGCGAGAGACCGATAGCGAACAAGTACCGTGA
GGGAAAGATGAAAAGCACTTTGGAAAGAGAGTTAAACAGTACGTGAAATTGTTGAAAGGGAAACGCTTGAAGTCAGTCGC
GTCGGCCGGGACTCAGCCTTGCAACCTTGCCTGGTGTACTTTCCGGTCGACGGGCCAGCATCAATTTTGACCGTCGGACA
AG-GGCGGGGGAAATGTGGCACCC----TCGGGTGTGTTATAGTCCCCCGTCGCATATGTCGGTTGGGATTGAGGAACTC
A-GCACGCCTTTAC---GG-TCGGGG-TTCGCCCACGTT--CGTGCTTAGGATGCT-GGCGTAATGGCTTTAAACGACCC
GTCTTGAAACACGGACCAAGGAGTCTAACATGCCCGCGAGTGTTTGGGTGGAAAACCCATGTGCGTAATGAAAGTGAAAG
TTGGGACCTCTGTCGTGGAGGGCACCGACGCCCGGACCAGACCTTTTGTGACGGATCCGCGGTAGAGCGTGTATGTTGGG
ACCCGAAAGATGGTGAACTATGCCTGAATAGGGTGAAGCCAGAGGAAACTCTGGTGGAGGCTCGTAGCGATTCTGACGTG
CAAATCGATCGTCAAATTTGGGTATAGGGGCGAAAGACTAATCGA
>7_A_disciforme_He3159                 
CATTATCA-GTTT-------GAACGTGGGGTTGTAGCTGGCCCT------CCGGGGCATGTGCACA--CCTTCACCCTCA
CTT--TATCTCTCACACCTGTGCACCTATGCGCGGGCTCCGTCGACCCCTCGC-------GGAGTCTGACGGGG------
---CTCGCG--TTCTTTT---CACAAACCCCCCATGTATGTCTT---CAGAATGTCGCA------TGCTATAAACCCCTC
CTTTAA-ACCACTTTTCACCACCGAATTTTTGGGTTTTCCCTTCATTAAAAAACCCACCAAATGGCAATAATTAAGGTGA
ATTGCAAAATTCATGGAATCTCCAAACCTTTAACCCCCCCTGGCCCCCCTGGGAATTCCAAGGGGCCCCCCGGTCTAATG
GTCTTTAATTTCTCACCCAAGGTTCATTCTTTCGGGAAGGGGCCT-----GGGTTGGAATTTGAAGGCTTTT-GCCGGCC
TT-AACCCCTCGGGGGGGGCGGGTCCCCTTGAAAGGCTTTACTG-TGACCCTCTCGCAGGTCGTTCGC-CTCTGGCTTGA
TAATTGTCTATGCCGTTGGCTGTCCGACCCGTGAGCTCACGGGGGCCTCGCTTCTAACCG----TCCCTC----GGGACA
--TCACTCTAAACTTGACCTCAGAT-CAGGCGGCCCCTAGTA-CTGCGAGTGAAGCGGGAAAAGCTCAAATTTAAAATCT
GGCGGTCCTCCGGCCGTCCGAGTTGTAGTCTAGAGAAGTGCCTTCCGCGCTGGACCGTGTACAAGTCTCCTGGAACGGAG
CGTCGTAGAGGGTGAGAATCCCGTCTTTGACACGGACCGCCAGTGCTATGTGATGCGCTCTCTAAGAGTCGAGTTGTTTG
GGAATGCAGCTCAAAATGGGTGGTGAATTCCATCTAAAGCTAAATATTGGCGAGAGACCGATAGCGAACAAGTACCGTGA
GGGAAAGATGAAAAGCACTTTGGAAAGAGAGTTAAACAGTACGTGAAATTGTTGAAAGGGAAACGCTTGAAGTCAGTCGC
GTCCGCCGGGACTCAGCCTCGCAACCTTGCCTGGTGTACTTTCCGGTGGACGGGTCAGCATCAATTTTGACCGTCGGACA
AG-GGTGGGGGAAATGTGGCACCC----TCGGGTGTGTTATAGTCCCCCG-CGCATACGTCGGTTGGGATTGAGGAACTC
A-GCACGCCTTCAC--AGGT-CGGGGCTTTGCCCACGTTATCGTGCTCAGGATGCT-GGCGTAATGGCTTTAAACGACCC
GTCTTGAAACACGGACCAAGGAGTCTAACATGCCCGCGAGTGTTTGGGTGGAAAACCCGTGCGCGTAATGAAAGTGAAAG
TTGGGACCTCTGTCGTGGAGGGCACCGACGCCCGGACCAGACCTTCTGTGACGGATCCGCGGTAGAGCGTGTATGTTGGG
ACCCGAAAGATGGTGAACTATGCCTGAATAGGGTGAAGCCAGAGGAAACTCTGGTGGAGGCTCGTAGCGATTCTGACGTG
CAAATCGATCGTCAAATTTGGGTATAGGGGCGAAAGACTAATCGA
>8_Gl_vitellinus_646cc                 
CATTATAGTAACAAA---TGAGGATCGAGGTTGTAGCTGGCCGCCGTAAAAGGGGGCATGTGCACG--CCTCTTTCTGAA
A-CCATACCATACAC--CTGTGCACCTTCGCGTGGG---TCGAGAAGGGT------TAAACCTGATCGGC----------
----CCGCG--TCTTTTATACAAACACCCA---ACGTATGTCTT---CAGAATGTAACATCTTGATGTATT-TAAACCAC
ATCTAA-TACAACTTTCAACAACGGATCTCTTGGCTCTCGCATCGATGAAGAACGCAGCGAAATGCGATAAGTAATGTGA
ATTGCAGAATTCAGTGAATCATCGAATCTTTGAACGCACCTTGCGCCCTTTGGTATTCCGAAGGGCACGCCTGTTTGAGT
GTCGTGAAATTCTCAGCCCTATCCCCTTTTG--TTAGGCGGAA------AGGGATTGGACTTGGAGGT-TCTTGCCGGCC
CT---------CGT-GGT-TCGGCTCCTCTCAAATGCATTAGTG-CGTCTCGTT---GCGATGT-TACCTTT-GGTGTGA
TAGATATCTACGCCACGGGGT-GTCGCTCTCGAA-------GGGTCG-CGCTTACAACCG-----TCCTATTGCAGGACA
-ATTCATCGAAACT-GACCTCAAAT-CAGGCG-CCCCTAGTAACTGCGAGTGAAGCGGGAAAAGCTCAAATTTAAAATCT
GGCGGCCT-C-GGCCGTCCGAGTTGTAGTCTGGAGAAGCGTTTTCCGCGTTGGACCGTGTACAAGTTTCCTGGAACGGAG
CGTCATAGAGGGTGAGAATCCCGTCTTTGACACGGACCCCAA-TGCTTTGTGATGCGCTCTCAAAGAGTCGAGTTGTTTG
GGAATGCAGCTCAAAATGGGTGGTGAATTCCATCTAAAGCTAAATATTGGCGAGAGACCGATAGCGAACAAGTACCGTGA
GGGAAAGATGAAAAGCACTTTGGAAAGAGAGTTAAACAGTACGTGAAATTGTTGAAAGGGAAACGCTTGAAGTCAGTCGC
GTCGGCCGGGACTCAGCCTTGCTTCC--GCTTGGTGTACTTTCCGGTCGACGGGCCAGCATCAATTTTGACCGCGAGATA
AA-GGTGGAGGAAATGTGGCTCTC----TCGGGAGTGTTATAGTCCTCTGTCACATGTCGCGGTTGGGATTGAGGAACTC
A-GCACGCCTTTAT---GG-CCGGGG-TTCGCCCACGTT--CGTGCTTAGGATGCT-GGCGTAATGGCTTTAAACGACCC
GTCTTGAAACACGGACCAAGGAGTCTAACATGCCTGCGAGTGTTCGGGTGGAAAACCCGTGCGCGTAATGAAAGTGAAAG
TTGGGATCCCTGTCGTGGGGTGCACCGACGCCCGGACCAGAACTTCTGTGACGGATCTGCGGTAGAGCATGTATGTTGGG
ACCCGAAAGATGGTGAACTATGCCTGAATAGGGTGAAGCCAGAGGAAACTCTGGTGGAGGCTCGTAGCGATTCTGACGTG
CAAATCGATCGTCAAATTTGGGTATAGGGGCGAAAGACTAATCGA
>9_Gl_vitellinus_259cc                 
CATTATAGTAACAAA---TGAGGATCGAGGTTGTAGCTGGCCGCCGTAAAAGGGGGCATGTGCACG--CCTCTTTCTGAA
A-CCATACCATACAC--CTGTGCACCTTCGCGTGGG---TCGAGAAGGGT------TAAACCTGATCGGC----------
----CCGCG--TCTTTTATACAAACACCCA---ACGTATGTCTT---CAGAATGTAACATCTTGATGTATT-TAAACCAC
ATCTAA-TACAACTTTCAACAACGGATCTCTTGGCTCTCGCATCGATGAAGAACGCAGCGAAATGCGATAAGTAATGTGA
ATTGCAGAATTCAGTGAATCATCGAATCTTTGAACGCACCTTGCGCCCTTTGGTATTCCGAAGGGCACGCCTGTTTGAGT
GTCGTGAAATTCTCAACCCTATCCCCTTTTG--TTAGGCGGAA------AGGGATTGGACTTGGAGGT-TCTTGCCGGCC
CT---------CGT-GGT-TCGGCTCCTCTCAAATGCATTAGTG-CGTCTCGTT---GCGATGT-TACCTTT-GGTGTGA
TAGATATCTACGCCACGGGGT-GTCGCTCTCGAA-------GGGTCG-CGCTTACAACCG-----TCCTATTGCAGGACA
-ATTCATCGAAACTTGACCTCAAAT-CAGGCTGCCCCTAGTAACTGCGAGTGAAGCGGGAAAAGCTCAAATTTAAAATCT
GGCGGCCT-C-GGCCGTCCGAGTTGTAGTCTGGAGAAGCGTTTTCCGCGTTGGACCGTGTACAAGTTTCCTGGAACGGAG
CGTCATAGAGGGTGAGAATCCCGTCTTTGACACGGACCCCAA-TGCTTTGTGATGCGCTCTCAAAGAGTCGAGTTGTTTG
GGAATGCAGCTCAAAATGGGTGGTGAATTCCATCTAAAGCTAAATATTGGCGAGAGACCGATAGCGAACAAGTACCGTGA
GGGAAAGATGAAAAGCACTTTGGAAAGAGAGTTAAACAGTACGTGAAATTGTTGAAAGGGAAACGCTTGAAGTCAGTCGC
GTCGGCCGGGACTCAGCCTTGCTTCC--GCTTGGTGTACTTTCCGGTCGACGGGCCAGCATCAATTTTGACCGCGAGATA
AA-GGTGGAGGAAATGTGGCTCTC----TCGGGAGTGTTATAGTCCTCTGTCACATGTCGCGGTTGGGATTGAGGAACTC
A-GCACGCCTTTAT---GG-CCGGGG-TTCGCCCACGTT--CGTGCTTAGGATGCT-GGCGTAATGGCTTTAAACGACCC
GTCTTGAAACACGGACCAAGGAGTCTAACATGCCTGCGAGTGTTCGGGTGGAAAACCCGTGCGCGTAATGAAAGTGAAAG
TTGGGATCCCTGTCGTGGGGTGCACCGACGCCCGGACCAGAACTTCTGTGACGGATCTGCGGTAGAGCATGTATGTTGGG
ACCCGAAAGATGGTGAACTATGCCTGAATAGGGTGAAGCCAGAGGAAACTCTGGTGGAGGCTCGTAGCGATTCTGACGTG
CAAATCGATCGTCAAATTTGGGTATAGGGGCGAAAGACTAATCGA
>10_A_mirabilis_JMB2152                
CATTAGAGTAACAAACAAAGGGGGCTGAGGTTGTAGCTGGCCGCCCCG----GTGGTATGTGCACGCCCCTCCCCCCGAA
AACCAAACCATACAC--CTGTGCACCTTTGCGTGGG---TCGGGAGGGAT------AAAACCCGATCGGC----------
----CCGCG--TCCTTTT-ACAACAAAC-------GCATGTCTT---CAGAATGTCACACATTGATGTCTT-AAAACAAC
ATCCAA-TACAACTTTCAACAACGGATCTCTTGGCTCTCGCATCGATGAAGAACGCAGCGAAATGCGATAAGTAATGTGA
ATTGCAGAATTCAGTGAATCATCGAATCTTTGAACGCACCTTGCGCCCTTTGGTATTCCGAAGGGCACGCCTGTTTGAGT
GTCGTGAAATTCTCAACCCCCTCCCCCTTTG--TTGTGAAGGTGGGC-CAGGGCTTGGACTTGGAGGT-TCTTGCCGGGC
TT---------TTTGAGC-TCGGCTCCTCTCAAATGCATTAGTG-CGTCTCGTTTTTGTGGCGT-TACCTTTTGGTGTGA
TAGATATCTACGCCACCTGGTCGTCGCAGTCAAAT-AAAAGAGGCCG-TGCTCACAACCG-TCTTCCCTTGTG-GGGACA
-ACACATCGAAACT-GACCTCAAAT-CAGGCGGCCCCTAGTAACTGCGAGTGAAGCGGGAAAAGCTCAAATTTAAAATCT
GGCGGTCT-C-GGCCGTCCGAGTTGTAGTCTGGAGAAGCGTTTTCCGCGTTGGACCGTGTACAAGTTTCCTGGAACGGAG
CGTCATAGAGGGTGAGAATCCCGTCTTTGACACGGACCCCAA-GGCTTTGTGATGCGCTCTCAAAGAGTCGAGTTGTTTG
GGAATGCAGCTCAAAATGGGTGGTGAATTCCATCTAAAGCTAAATATTGGCGAGAGACCGATAGCGAACAAGTACCGTGA
GGGAAAGATGAAAAGCACTTTGGAAAGAGAGTTAAACAGTACGTGAAATTGTTGAAAGGGAAACGCTTGAAGTCAGTCGC
GTCGGCCGGGACTCAGCCTTGCTTCC--GCTTGGTGTACTTTCCGGTCGACGGGCCAGCATCAATTTTGACCGCGAGATA
AA-GGTGGAGGAAATGTGGCTCCC----TCGGGAGTGTTATAGTCTTCCGCCACATGTCGTGGTTGGGATTGAGGAACTC
A-GCACGCCTTTAT---GG-TCGGGG-TTCGCCCACGTT--CGTGCTTAGGATGCT-GGCGTAATGGCTTTAAACGACCC
GTCTTGAAACACGGACCAAGGAGTCTAACATGCCTGCGAGTGTTCGGGTGGAAAACCCGTGCGCGTAATGAAAGTGAAAG
TTGGGATCCCTGTCGTGGGGTGCACCGACGCCCGGACCAGAGCTTCTGTGACGGATCTGCGGTAGAGCATGTATGTTGGG
ACCCGAAAGATGGTGAACTATGCCTGAATAGGGTGAAGCCAGAGGAAACTCTGGTGGAGGCTCGTAGCGATTCTGACGTG
CAAATCGATCGTCAAATTTGGGTATAGGGGCGAAAGACTAATCGA
>13_A_mirabilis_He3733                 
CATTAGAGTAACAAACAAAGGGGGCTGAGGCTGTAGCTGGCCGCTCCG----GTGGCATGTGCACGCCTCTCCCCCGAAA
ACCCAAACCATACAC--CTGTGCACCTTTGCGTGGG---TCGGGAGGGGT------AAAACCCGATCGGC----------
----CCGCG--TCCCTTT-ACAACAAAC-------GCATGTCTT---CAGAATGTAACACATTGATGTCTT-AAAACAAC
ATCCAA-TACAACTTTCAACAACGGATCTCTTGGCTCTCGCATCGATGAAGAACGCAGCGAAATGCGATAAGTAATGTGA
ATTGCAGAATTCAGTGAATCATCGAATCTTTGAACGCACCTTGCGCCCTTTGGTATTCCGAAGGGCACGCCTGTTTGAGT
GTCGTGAAATTCTCAACCCC-TCCCCCTTTG--TTGTGAAGGTGGGC-AAGGGCTTGGACTTGGAGGT-TCTTGCAGGGC
TT---------TT---GC-TCCGCTCCTCTCAAATGCATTAGTG-CGTCTCGTT---GTGACGT-TACCTTTTGGTGTGA
TAGATATCTACGCCATGGGGTCGTCGCTGTGAAA----AAGAGGCCG-TGCTCACAACCCGTCCCCCCATGTGTGGGACA
-ACACTTTGAAACTTGACCTCAAAT-CAGGCGGCCCCTAGTAACTGCGAGTGAAGCGGGAAAAGCTCAAATTTAAAATCT
GGCGGTCTTT-GGCCGTCCGAGTTGTAGTCTGGAGAAGCGTTTTCCGCGTTGGACCGTGTACAAGTTTCCTGGAACGGAG
CGTCATAGAGGGTGAGAATCCCGTCTTTGACACGGACCCCAA-GGCTTTGTGATGCGCTCTCAAAGAGTCGAGTTGTTTG
GGAATGCAGCTCAAAATGGGTGGTGAATTCCATCTAAAGCTAAATATTGGCGAGAGACCGATAGCGAACAAGTACCGTGA
GGGAAAGATGAAAAGCACTTTGGAAAGAGAGTTAAACAGTACGTGAAATTGTTGAAAGGGAAACGCTTGAAGTCAGTCGC
GTCGGCCGGGACTCAGCCTTGCTTCC--GCTTGGTGTACTTTCCGGTCGACGGGCCAGCATCAATTTTGACCGCGAGATA
AA-GGTGGAGGAAATGTGGCTCTC----TCGGGAGTGTTATAGTCCTCCGCCACATGTCGTGGTTGGGATTGAGGAACTC
A-GCACGCCTTTAT---GG-TCGGGG-TTCGCCCACGTT--CGTGCTTAGGATGCT-GGCGTAATGGCTTTAAACGACCC
GTCTTGAAACACGGACCAAGGAGTCTAACATGCCTGCGAGTGTTCGGGTGGAAAACCCGTGCGCGTAATGAAAGTGAAAG
TTGGGATCCCTGTCGTGGGGTGCACCGACGCCCGGACCAGAACTTCTGTGACGGATCTGCGGTAGAGCATGTATGTTGGG
ACCCGAAAGATGGTGAACTATGCCTGAATAGGGTGAAGCCAGAGGAAACTCTGGTGGAGGCTCGTAGCGATTCTGACGTG
CAAATCGATCGTCAAATTTGGGTATAGGGGCGAAAGACTAATCGA
>14_A_mirabilis_He2730                 
CATTAGAGTAACAAACAAACGGGGCTGAGGTTGTAGCTGGCCGCTCCG----GCGGCACGTGCACGTCTCTCCCCCAAAA
A-CCAAACCATACAC--CTGTGCACCTCTGCGTGGG---TCGGGAGGGGT------AAAGCCCGATCGGC----------
----CCGCG--TCCCTTT-ACAACAAAC-------GCATGTCTT---CAGAATGTAACACATCGATGTCTT-AAAAAAAC
ATCCAA-TACAACTTTCAACAACGGATCTCTTGGCTCTCGCATCGATGAAGAACGCAGCGAAATGCGATAAGTAATGTGA
ATTGCAGAATTCAGTGAATCATCGAATCTTTGAACGCACCTTGCGCCCTTTGGTATTCCGAAGGGCACGCCTGTTTGAGT
GTCGTGAAATTCTCAACCC--TCCCCCTTTG--TTGTGAAGGTGGGA-AAGGGATTGGACTTGGAGGT-TCTTGCCGGGC
TC---------TCC-AGC-TCGGCTCCTCTCAAATGCATTAGCG-CGTCTCGTT---GTGACGT-TACCTTTTGGTGTGA
TAGATATCTATGCCACGGGGTCGTCGCTGTCAAA----G-GAGGCCG-TGCTCACAATCG----TCCCGCGTCTGGGACA
-GTACATCGAAACTTGACCTCAAAT-CAGGCGGCCCCTAGTAACTGCGAGTGAAGCGGGAAAAGCTCAAATTTAAAATCT
GGCGGTCCCC-GGCCGTCCGAGTTGTAGTCTGGAGAAGCGTTTTCCGCGTTGGACCGTGTACAAGTTTCCTGGAACGGAG
CGTCATAGAGGGTGAGAATCCCGTCTTTGACACGGACCCCAA-GGCTTTGTGATGCGCTCTCAAAGAGTCGAGTTGTTTG
GGAATGCAGCTCAAAATGGGTGGTGAATTCCATCTAAAGCTAAATATTGGCGAGAGACCGATAGCGAACAAGTACCGTGA
GGGAAAGATGAAAAGCACTTTGGAAAGAGAGTTAAACAGTACGTGAAATTGTTGAAAGGGAAACGCTTGAAGTCAGTCGC
GTCGGCCGGGACTCAGCCTTGCTTTC--GCTTGGTGTACTTTCCGGTCGACGGGCCAGCATCAATTTTGACCGCGAGATA
AA-GGTGGAGGAAATGTGGCTCCC----TAGGGAGTGTTATAGTCCTCTGTCACATATCGTGGTCGGGATTGAGGAACTC
A-GCACGCCTTTAT---GG-TCGGGG-TTCGCCCACGTT--CGTGCTTAGGATGCT-GGCGTAATGGCTTTAAACGACCC
GTCTTGAAACACGGACCAAGGAGTCTAACATGCCTGCGAGTGTTCGGGTGGAAAACCCGTGCGCGTAATGAAAGTGAAAG
TTGGGATCCCTGTCGTGGGGTGCACCGACGCCCGGACCAGAACTTCTGTGACGGATCTGCGGTAGAGCATGTATGTTGGG
ACCCGAAAGATGGTGAACTATGCCTGAATAGGGTGAAGCCAGAGGAAACTCTGGTGGAGGCTCGTAGCGATTCTGACGTG
CAAATCGATCGTCAAATTTGGGTATAGGGGCGAAAGACTAATCGA
>15_A_mirabilis_Dai13281               
CATTAGAGTAACAAACAAAGGGGGCTGAGGTTGTAGCTGGCCGCTCCG----GTGGCATGTGCACGCCTCTCCCCCGGAA
A-CCAAACCTCACAC--CTGTGCACCTCCGCGTGGG---TCGGGAGGGGT------AAAACCCAATCGGC----------
----CCGCG--TCCTTTT-ACAACAAA-T------GCATGTCTT---CAGAATGTAACACATTGATGTCTT-AAAACAAC
ATCCAA-TACAACTTTCAACAACGGATCTCTTGGCTCTCGCATCGATGAAGAACGCAGCGAAATGCGATAAGTAATGTGA
ATTGCAGAATTCAGTGAATCATCGAATCTTTGAACGCACCTTGCGCCCTTTGGTATTCCGAAGGGCACGCCTGTTTGAGT
GTCGTGAAATTCTCAACCC--TCTGCCTTTG--TTG------C---A-AAGGGCTTGGACTTGGAGGT-TTTTGCCGGGC
TC---------TCC-AGC-TCGACTCCTCTCAAACGCATTAGTG-CGTCTCGTT---GTGATGT-TACCTTTTGGTGTGA
TAGATATCTACGCCACGGGGCCGTCACTGTGAAA----AAGAGGCAG-TGCTCACAACCG---TCCCCACATCTGGGACC
-ATACATCGAAACT-GACCTCAAAT-CAGGCGGCCCCTAGTAACTGCGAGTGAAGCGGGAAAAGCTCAAATTTAAAATCT
GGCAGTCT-C-GGCTGTCCGAGTTGTAGTCTGGAGAAGCGTTTTCCGCGTTGGACCGTGTACAAGTTTCCTGGAACGGAG
CGTCATAGAGGGTGAGAATCCCGTCTTTGACACGGACCCCAA-GGCTTTGTGATGCGCTCTCAAAGAGTCGAGTTGTTTG
GGAATGCAGCTCAAAATGGGTGGTGAATTCCATCTAAAGCTAAATATTGGCGGGAGACCGATAGCGAACAAGTACCGTGA
GGGAAAGATGAAAAGCACTTTGGAAAGAGAGTTAAACAGTACGTGAAATTGTTGAAAGGGAAACGCTTGAAGTCAGTCGC
GCCGGCCGGAACTCAGCCTGGCTTTC--GCTTGGTGTACTTTCCGGTCGACGGGCCAGCATCAATTTTGACCGCGAGATA
AA-GGTGGAGGAAATGTGGCTCCC----TCGGGAGTGTTATAGTCCTCTGTCACATGTCGTGGTTGGGATTGAGGAACTC
A-GCACGCCTTTAT---GG-TCGGGG-TCCGCCCACGTT--CGTGCTTAGGATGCT-GGCGTAATGGCTTTAAACGACCC
GTCTTGAAACACGGACCAAGGAGTCTAACATGCCTGCGAGTGTTCGGGTGGAAAACCCGTGCGCGTAATGAAAGTGAAAG
TTGGGATCCCTGTCGTGGGGTGCACCGACGCCCGGACCAGAACTTCTGTGACGGATCTGCGGTAGAGCATGTATGTTGGG
ACCCGAAAGATGGTGAACTATGCCTGAATAGGGTGAAGCCAGAGGAAACTCTGGTGGAGGCTCGTAGCGATTCTGACGTG
CAAATCGATCGTCAAATTTGGGTATAGGGGCGAAAGACTAATCGA
>11_Gl_decorticans_MR12666             
CATTATAGTAACAAACA--GAGGGA-GATGTTGTAGCTGGCCGCTGTAAAAGGTGACATGTGCACGCACCCCCCTCTGAA
AACCAAACCATACAC--CTGTGCACCTTCGCGTGGG---TCGGGGAGGGT------AAAACCTTGTCGGC----------
----CCGCG--TCTTTTT-ACAACAAACA-----CGCATGTCTT---CAGAATGTAACACTTTGATGTCTT-AAAA--AC
ATCCAA-TACAACTTTCAACAACGGATCTCTTGGCTCTCGCATCGATGAAGAACGCAGCGAAATGCGATAAGTAATGTGA
ATTGCAGAATTCAGTGAATCATCGAATCTTTGAACGCACCTTGCGCCCTTTGGTATTCCGAAGGGCACGCCTGTTTGAGT
GTCGTGAAATTCTCAAACCTGACCCCTTTTG--TTAGGTGGTT------AGGGATTGGACTTGGAGGTATTTTGCCGGGC
CC---------TTC-AGC-TCAGCTCCTCTTAAATGCATTAGTG-CGTCTCGTA---GCGACGT-TGCCTTTTGGTGTGA
TACATATCTACGCCACGGGGTCGTTGTTCT--------------CCG-CGCTGACAACCG----TCCTCCCCACGGGACA
-ATTCATCGAAACT-GACCTCAAAT-CAGGCGGCCCCTAGTAACTGCGAGTGAAGCGGGAAAAGCTCAAATTTAAAATCT
GGCGGTTT-C-GGCCGTCCGAGTTGTAGTCTGGAGAAGCGTTTTCCGCGTTGGACCGTGTACAAGTTTCCTGGAACGGAG
CGTCATAGAGGGTGAGAATCCCGTCTTTGACACGGACCCCAA-TGCTTTGTGATGCGCTCTCAAAGAGTCGAGTTGTTTG
GGAATGCAGCTCAAAATGGGTGGTGAATTCCATCTAAAGCTAAATATTGGCGAGAGACCGATAGCGAACAAGTACCGTGA
GGGAAAGATGAAAAGCACTTTGGAAAGAGAGTTAAACAGTACGTGAAATTGTTGAAAGGGAAACGCTTGAAGTCAGTCGC
GTCGGCCGGGACTCAGCCTTGCTTTC--GCTTGGTGTACTTTCCGGTCGACGGGCCAGCATCAATTTTGATCGCGGGATA
AA-GGCGGAGGAAATGTGGCTCCC----TCGGGAGTGTTATAGTCCTCTGTCACATGCCGTGGTTGGGATTGAGGAACTC
A-GCACGCCTTTAT---GG-TCGGGG-TTCGCCCACGTT--CGTGCTTAGGATGCT-GGCGTAATGGCTTTAAACGACCC
GTCTTGAAACACGGACCAAGGAGTCTAACATGCCTGCGAGTGTTCGGGTGTAAAACCCGTGCGCGTAATGAAAGTGAAAG
TTGGGATCCCTGTCGTGGGGTGCACCGACGCCCGGACCAGAACTTCTGTGACGGATCTGCGGTAGAGCATGTATGTTGGG
ACCCGAAAGATGGTGAACTATGCCTGAATAGGGTGAAGCCAGAGGAAACTCTGGTGGAGGCTCGTAGCGATTCTGACGTG
CAAATCGATCGTCAAATTTGGGTATAGGGGCGAAAGACTAATCGA
>12_Gl_decorticans_MR12665             
CATTATAGTAACAAACA--GAGGGA-GATGTTGTAGCTGGCCGCTGTAAAAGGTGACATGTGCACGCACCCCCCTCTGAA
AACCAAACCATACAC--CTGTGCACCTTCGCGTGGG---TCGGGGAGGGT------AAAACCTTGTCGGC----------
----CCGCG--TCTTTTT-ACAACAAACA-----CGCATGTCTT---CAGAATGTAACACTTTGATGTCTT-AAAA--AC
ATCCAA-TACAACTTTCAACAACGGATCTCTTGGCTCTCGCATCGATGAAGAACGCAGCGAAATGCGATAAGTAATGTGA
ATTGCAGAATTCAGTGAATCATCGAATCTTTGAACGCACCTTGCGCCCTTTGGTATTCCGAAGGGCACGCCTGTTTGAGT
GTCGTGAAATTCTCAAACCTGACCCCTTTTG--TTAGGTGGTT------AGGGATTGGACTTGGAGGTATTTTGCCGGGC
CC---------TTC-AGC-TCAGCTCCTCTTAAATGCATTAGTG-CGTCTCGTA---GCGACGT-TGCCTTTTGGTGTGA
TACATATCTACGCCACGGGGTCGTTGTTCT--------------CCG-CGCTGACAACCG----TCCTCCCCACGGGACA
-ATTCATCGAAACT-GACCTCAAAT-CAGGCGACCCCTAGTAACTGCGAGTGAAGCGGGAAAAGCTCAAATTTAAAATCT
GGCGGTTT-C-GGCCGTCCGAGTTGTAGTCTGGAGAAGCGTTTTCCGCGTTGGACCGTGTACAAGTTTCCTGGAACGGAG
CGTCATAGAGGGTGAGAATCCCGTCTTTGACACGGACCCCAA-TGCTTTGTGATGCGCTCTCAAAGAGTCGAGTTGTTTG
GGAATGCAGCTCAAAATGGGTGGTGAATTCCATCTAAAGCTAAATATTGGCGAGAGACCGATAGCGAACAAGTACCGTGA
GGGAAAGATGAAAAGCACTTTGGAAAGAGAGTTAAACAGTACGTGAAATTGTTGAAAGGGAAACGCTTGAAGTCAGTCGC
GTCGGCCGGGACTCAGCCTTGCTTTC--GCTTGGTGTACTTTCCGGTCGACGGGCCAGCATCAATTTTGATCGCGGGATA
AA-GGCGGAGGAAATGTGGCTCCC----TCGGGAGTGTTATAGTCCTCTGTCACATGCCGTGGTTGGGATTGAGGAACTC
A-GCACGCCTTTAT---GG-TCGGGG-TTCGCCCACGTT--CGTGCTTAGGATGCT-GGCGTAATGGCTTTAAACGACCC
GTCTTGAAACACGGACCAAGGAGTCTAACATGCCTGCGAGTGTTCGGGTGTAAAACCCGTGCGCGTAATGAAAGTGAAAG
TTGGGATCCCTGTCGTGGGGTGCACCGACGCCCGGACCAGAACTTCTGTGACGGATCTGCGGTAGAGCATGTATGTTGGG
ACCCGAAAGATGGTGAACTATGCCTGAATAGGGTGAAGCCAGAGGAAACTCTGGTGGAGGCTCGTAGCGATTCTGACGTG
CAAATCGATCGTCAAATTTGGGTATAGGGGCGAAAGACTAATCGA
>95_A_zealandicus_PDD106668            
CATTATAGTAAACAAAACCCGAGGG-GATGCTGTCGCTGGCCA---TA----GCG-CATGTGCACG-CTCC-TCTCGGTA
AACCCAACCACACAC-CTTGTGCACGTTCGCGTGGG---TCGG-------------AAA---CGA----C----------
----CCGCG--TCTCTTT-ACAACAAAC-------GCATGTCTT---CAGAATGTAACACACAGATGTCAT-AAAACAAC
ATCCAA-TACAACTTTCAACAACGGATCTCTTGGCTCTCGCATCGATGAAGAACGCAGCGAAATGCGATAAGTAATGTGA
ATTGCAGAATTCAGTGAATCATCGAATCTTTGAACGCACCTTGCGCCCTTTGGTATTCCGAAGGGCACGCCTGTTTGAGT
GTCGTGAAATTCTCAACCCCGACCCCTTTTG--TTAGGTGGGC------GGGGATTGGACTTGGAGGT-TCTTGCCGGTC
TC------------------CGGCTCCTCTCAAATGCATTAGTG-CGCCTCGAC---GTGACACGCAACCTTTGGTGTGA
TAGATATCTACGCCACTGGGT-GTCGCGA-CAA------AGAG-CCG-TGCTGCCAACCG----TCCTCCC-GCAGGACA
-ATTCATCGAAACTTGACCTCAAAT-CAGGCGG???????????????????????????????????????????????
????????????????????????????????????????????????????????????????????????????????
????????????????????????????????????????????????????????????????????????????????
????????????????????????????????????????????????????????????????????????????????
????????????????????????????????????????????????????????????????????????????????
????????????????????????????????????????????????????????????????????????????????
????????????????????????????????????????????????????????????????????????????????
????????????????????????????????????????????????????????????????????????????????
????????????????????????????????????????????????????????????????????????????????
????????????????????????????????????????????????????????????????????????????????
????????????????????????????????????????????????????????????????????????????????
?????????????????????????????????????????????
>18_S_triviale_MR11721                 
CATTAGAGAAAT-----ATAATGATCGAGGTTGTAGCTGGTCCTTCGG------GACATGTGCACG--CCTCCTTCATCC
ATC-------TACAC--CTGTGCACCTCTGCGTGGG---TCGGGAA------------------ACCGGC----------
----CTGCG--TCTTTTT----ATAAACTC---TTGTATGTCTT---AAGAATGTCAATGTC-GATGTCAT-AAAAACGC
ATCTAA-TACAACTTTCAACAACGGATCTCTTGGCTCTCGCATCGATGAAGAACGCAGCGAAATGCGATAAGTAATGTGA
ATTGCAGAATTCAGTGAATCATCGAATCTTTGAACGCACCTTGCGCCCTTTGGTATTCCGAAGGGCACGCCTGTTTGAGT
GTCGTGAAATTCTCAACCCTCCCCCCTTTTG--TTAGGTGGGG-----AACGGATTGGACTTGGAGGT-TCTTGCCGGTC
TT---------CGA-----TCGGCTCCTCTCAAATGCATTAGTGTCGTCTCATC---TGGACGTTAACCTTT-GGTGTGA
TAATTATCTACGCCGCTGGGA-GTCCTGATGCGA---------ACGG-TGCTTACAACCG-----TCTCCTTGTGAGACA
-ATTCATCGAAACT-GACCTCAAAT-CAGGCTGCCCCTAGTAACTGCGAGTGAAGCGGGAAAAGCTCAAATTTAAAATCT
GGCGGTCTTC-GGCCGTCCGAGTTGTAGTCTGGAGAAGTGTTTTCCGCGTTGGGCCGTGTACAAGTTTCCTGGAACGGAG
CGTCGTAGAGGGTGAGAATCCCGTCTTTGACACGGACCCCAA-TGCTTTGTGATGCGCTCTCAAAGAGTCGAGTTGTTTG
GGAATGCAGCTCAAAATGGGTGGTGAATTCCATCTAAAGCTAAATATTGGCGAGAGACCGATAGCGAACAAGTACCGTGA
GGGAAAGATGAAAAGCACTTTGGAAAGAGAGTTAAACAGTACGTGAAATTGTTGAAAGGGAAACGCTTGAAGTCAGTCGC
GTCGTCCGGGACTCAGCCTTGCTCTC--GCTTGGTGTACTTTCCGGTCGACGGGCCAGCATCAATTTTGACCGCGAGATA
AA-GTCGGAGGAAATGTGGCTCTT----TCGGGAGTGTTATAGTCCTTCGTCGCATGTCGCGGTTGGGATTGAGGAACTC
A-GCACGCCTTTAT---GG-CCGGGG-TTCGCCCACGTT--CGTGCTTAGGATGCT-GGCGTAATGGCTTTAAACGACCC
GTCTTGAAACACGGACCAAGGAGTCTAACATGCCTGCGAGTGTTCGGGTGGAAAACCCGTGCGCACAATGAAAGTGAAAG
TTGGGAACCCTGTCGTGGGGTGCACCGACGCCCGGACCAGAACTTCTGTGACGGATCTGCGGTAGAGCATGTATGTTGGG
ACCCGAAAGATGGTGAACTATGCCTGAATAGGGTGAAGCCAGAGGAAACTCTGGTGGAGGCTCGTAGCGATTCTGACGTG
CAAATCGATCGTCAAATTTGGGTATAGGGGCGAAAGACTAATCGA
>16_S_triviale_232cc                   
CATTAGAGAAAT-----ATAACGATCGAGGTTGTAGCTGGTCCTTCGG------GACATGTGCACG--CCTCCTTCATCC
ATC-------TACAC--CTGTGCACCTCTGCGTGGG---TCGGGAA------------------ACCGGC----------
----CTGCG--TCTTTTT----ATAAACTC---TTGTATGTCTT---AAGAATGTCAATGTC-GATGTCAT-AAAAACGC
ATCTAA-TACAACTTTCAACAACGGATCTCTTGGCTCTCGCATCGATGAAGAACGCAGCGAAATGCGATAAGTAATGTGA
ATTGCAGAATTCAGTGAATCATCGAATCTTTGAACGCACCTTGCGCCCTTTGGTATTCCGAAGGGCACGCCTGTTTGAGT
GTCGTGAAATTCTCAACCCTCCCCCCTTTTG--TTAGGTGGGG-----AACGGATTGGACTTGGAGGT-TCTTGCCGGTC
TT---------CGA-----TCGGCTCCTCTCAAATGCATTAGTGTCGTCTCATC---TGGACGTTAACCTTT-GGTGTGA
TAATTATCTACGCCGCTGGGA-GTCCTGATGCGA---------ACGG-TGCTTACAACCG-----TCTCCTTGTGAGACA
-ATTCATCGAAACT-GACCTCAAAT-CAGGCG-CCCCTAGTAACTGCGAGTGAAGCGGGAAAAGCTCAAATTTAAAATCT
GGCGGTCTTC-GGCCGTCCGAGTTGTAGTCTGGAGAAGTGTTTTCCGCGTTGGGCCGTGTACAAGTTTCCTGGAACGGAG
CGTCGTAGAGGGTGAGAATCCCGTCTTTGACACGGACCCCAA-TGCTTTGTGATGCGCTCTCAAAGAGTCGAGTTGTTTG
GGAATGCAGCTCAAAATGGGTGGTGAATTCCATCTAAAGCTAAATATTGGCGAGAGACCGATAGCGAACAAGTACCGTGA
GGGAAAGATGAAAAGCACTTTGGAAAGAGAGTTAAACAGTACGTGAAATTGTTGAAAGGGAAACGCTTGAAGTCAGTCGC
GTCGTCCGGGACTCAGCCTTGCTCTC--GCTTGGTGTACTTTCCGGTCGACGGGCCAGCATCAATTTTGACCGCGAGATA
AA-GTCGGAGGAAATGTGGCTCTT----TCGGGAGTGTTATAGTCCTTCGTCGCATGTCGCGGTTGGGATTGAGGAACTC
A-GCACGCCTTTAT---GG-CCGGGG-TTCGCCCACGTT--CGTGCTTAGGATGCT-GGCGTAATGGCTTTAAACGACCC
GTCTTGAAACACGGACCAAGGAGTCTAACATGCCTGCGAGTGTTCGGGTGGAAAACCCGTGCGCACAATGAAAGTGAAAG
TTGGGAACCCTGTCGTGGGGTGCACCGACGCCCGGACCAGAACTTCTGTGACGGATCTGCGGTAGAGCATGTATGTTGGG
ACCCGAAAGATGGTGAACTATGCCTGAATAGGGTGAAGCCAGAGGAAACTCTGGTGGAGGCTCGTAGCGATTCTGACGTG
CAAATCGATCGTCAAATTTGGGTATAGGGGCGAAAGACTAATCGA
>20_S_triviale_MR11264                 
CATTAGAGAAAT-----ATAACGATCGAGGTTGTAGCTGGTCCTTCGG------GACATGTGCACG--CCTCCTTCATCC
ATC-------TACAC--CTGTGCACCTCTGCGTGGG---TCGGGAA------------------ACCGGC----------
----CTGCG--TCTTTTT----ATAAACTC---TTGTATGTCTT---AAGAATGTCAATGTC-GATGTCAT-AAAAACGC
ATCTAA-TACAACTTTCAACAACGGATCTCTTGGCTCTCGCATCGATGAAGAACGCAGCGAAATGCGATAAGTAATGTGA
ATTGCAGAATTCAGTGAATCATCGAATCTTTGAACGCACCTTGCGCCCTTTGGTATTCCGAAGGGCACGCCTGTTTGAGT
GTCGTGAAATTCTCAACCCTCCCCCCTTTTG--TTAGGTGGGG-----AACGGATTGGACTTGGAGGT-TCTTGCCGGTC
TT---------CGA-----TCGGCTCCTCTCAAATGCATTAGTGTCGTCTCATC---TGGACGTTAACCTTT-GGTGTGA
TAATTATCTACGCCGCTGGGA-GTCCTGATGCGA---------ACGG-TGCTTACAACCG-----TCTCCTTGTGAGACA
-AT-CATCGAAACT-GACCTCAAAT-CAGGCG-CCCCTAGTAACTGCGAGTGAAGCGGGAAAAGCTCAAATTTAAAATCT
GGCGGTCTTC-GGCCGTCCGAGTTGTAGTCTGGAGAAGTGTTTTCCGCGTTGGGCCGTGTACAAGTTTCCTGGAACGGAG
CGTCGTAGAGGGTGAGAATCCCGTCTTTGACACGGACCCCAA-TGCTTTGTGATGCGCTCTCAAAGAGTCGAGTTGTTTG
GGAATGCAGCTCAAAATGGGTGGTGAATTCCATCTAAAGCTAAATATTGGCGAGAGACCGATAGCGAACAAGTACCGTGA
GGGAAAGATGAAAAGCACTTTGGAAAGAGAGTTAAACAGTACGTGAAATTGTTGAAAGGGAAACGCTTGAAGTCAGTCGC
GCCGTCCGGGACTCAGCCTTGCTCTC--GCTTGGTGTACTTTCCGGTCGACGGGCCAGCATCAATTTTGACCGCGAGATA
AA-GTCGGAGGAAATGTGGCTCTT----TCGGGAGTGTTATAGTCCTTCGTCGCATGTCGCGGTTGGGATTGAGGAACTC
A-GCACGCCTTTAT---GG-CCGGGG-TTCGCCCACGTT--CGTGCTTAGGATGCT-GGCGTAATGGCTTTAAACGACCC
GTCTTGAAACACGGACCAAGGAGTCTAACATGCCTGCGAGTGTTCGGGTGGAAAACCCGTGCGCACAATGAAAGTGAAAG
TTGGGAACCCTGTCGTGGGGTGCACCGACGCCCGGACCAGAACTTCTGTGACGGATCTGCGGTAGAGCATGTATGTTGGG
ACCCGAAAGATGGTGAACTATGCCTGAATAGGGTGAAGCCAGAGGAAACTCTGGTGGAGGCTCGTAGCGATTCTGACGTG
CAAATCGATCGTCAAATTTGGGTATAGGGGCGAAAGACTAATCGA
>23_S_triviale_SPG3308                 
CATTAGAGAAAT-----ATAACGATCGAGGTTGTAGCTGGTCCTTCGG------GACATGTGCACG--CCTCCTTCATCC
ATC-------TACAC--CTGTGCACCTTTGCGTGGG---TCGGGAA------------------ACCGGC----------
----CTGCG--TCTTTTTT---ATAAACTC---TTGTATGTCTT---AAGAATGTCAATGTC-GATGTCAT-AAAAACGC
ATCTAA-TACAACTTTCAACAACGGATCTCTTGGCTCTCGCATCGATGAAGAACGCAGCGAAATGCGATAAGTAATGTGA
ATTGCAGAATTCAGTGAATCATCGAATCTTTGAACGCACCTTGCGCCCTTTGGTATTCCGAAGGGCACGCCTGTTTGAGT
GTCGTGAAATTCTCAACCCTCCCCCCTTTTG--TTAGGTGGGG-----AACGGATTGGACTTGGAGGT-TCTTGCCGGTC
TT---------CGA-----TCGGCTCCTCTCAAATGCATTAGTGTCGTCTCATC---TGGACGTTAACCTTT-GGTGTGA
TAATTATCTACGCCGCTGGGA-GTCCTGATGCGA---------ACGG-TGCTTACAACCG-----TCTCCTTGTGAGACA
-ATTCATCGAAACT-GACCTCAAAT-CAGTTA-CCCCTAGTAACTGCGAGTGAAGCGGGAAAAGCTCAAATTTAAAATCT
GGCGGTCTTC-GGCCGTCCGAGTTGTAGTCTGGAGAAGTGTTTTCCGCGTTGGGCCGTGTACAAGTTTCCTGGAACGGAG
CGTCGTAGAGGGTGAGAATCCCGTCTTTGACACGGACCCCAA-TGCTTTGTGATGCGCTCTCAAAGAGTCGAGTTGTTTG
GGAATGCAGCTCAAAATGGGTGGTGAATTCCATCTAAAGCTAAATATTGGCGAGAGACCGATAGCGAACAAGTACCGTGA
GGGAAAGATGAAAAGCACTTTGGAAAGAGAGTTAAACAGTACGTGAAATTGTTGAAAGGGAAACGCTTGAAGTCAGTCGC
GTCGTCCGGGACTCAGCCTTGCTCTC--GCTTGGTGTACTTTCCGGTCGACGGGCCAGCATCAATTTTGACCGCGAGATA
AA-GTCGGAGGAAATGTGGCTCTT----TCGGGAGTGTTATAGTCCTTCGTCGCATGTCGCGGTTGGGATTGAGGAACTC
A-GCACGCCTTTAT---GG-CCGGGG-TTCGCCCACGTT--CGTGCTTAGGATGCT-GGCGTAATGGCTTTAAACGACCC
GTCTTGAAACACGGACCAAGGAGTCTAACATGCCTGCGAGTGTTCGGGTGGAAAACCCGTGCGCACAATGAAAGTGAAAG
TTGGGAACCCTGTCGTGCGGTGCACCGACGCCCGGACCAGAACTTCTGTGACGGATCTGCGGTAGAGCATGTATGTTGGG
ACCCGAAAGATGGTGAACTATGCCTGAATAGGGTGAAGCCAGAGGAAACTCTGGTGGAGGCTCGTAGCGATTCTGACGTG
CAAATCGATCGTCAAATTTGGGTATAGGGGCGAAAGACTAATCGA
>89_S_triviale_AG747                   
CATTAGAGAAAT-----ATAACGATCGAGGTTGTAGCTGGTCCTTCGG------GACATGTGCACG--CCTCCTTCATCC
ATC-------TACAC--CTGTGCACCTCTGCGTGGG---TCGGGAA------------------ACCGGC----------
----CTGCG--TCTTTTT----ATAAACTC---TTGTATGTCTT---AAGAATGTCAATGTC-GATGTCAT-AAAAACGC
ATCTAA-TACAACTTTCAACAACGGATCTCTTGGCTCTCGCATCGATGAAGAACGCAGCGAAATGCGATAAGTAATGTGA
ATTGCAGAATTCAGTGAATCATCGAATCTTTGAACGCACCTTGCGCCCTTTGGTATTCCGAAGGGCACGCCTGTTTGAGT
GTCGTGAAATTCTCAACCCTCCCCCCTTTTG--TTAGGTGGGG-----AACGGATTGGACTTGGAGGT-TCTTGCCGGTC
TT---------CGA-----TCGGCTCCTCTCAAATGCATTAGTGTCGTCTCATC---TGGACGTTAACCTTT-GGTGTGA
TAATTATCTACGCCGCTGGGA-GTCCTGATGCGA---------ACGG-TGCTTACAACCG-----TCTCCTTGTGAGACA
-ATTCATCGAAACTTGACCTCAAAT-CAGGCT-???????????????????????????????????????????????
????????????????????????????????????????????????????????????????????????????????
????????????????????????????????????????????????????????????????????????????????
????????????????????????????????????????????????????????????????????????????????
????????????????????????????????????????????????????????????????????????????????
????????????????????????????????????????????????????????????????????????????????
????????????????????????????????????????????????????????????????????????????????
????????????????????????????????????????????????????????????????????????????????
????????????????????????????????????????????????????????????????????????????????
????????????????????????????????????????????????????????????????????????????????
????????????????????????????????????????????????????????????????????????????????
?????????????????????????????????????????????
>17_S_antarcticus_SPG3313              
CATTAGAGAAAT-----ATAACGATCGAGGTTGTAGCTGGTCCCTCGG------GACATGTGCACG--CCTCCTTCATCC
ATC-------TACAC--CTGTGCACCTCTGCGTGGG---TCGGGAA------------------ACCGGC----------
----CTGCG--TCTTTTT---AATAAACTC---TTGTATGTCTT---AAGAATGTAAATGTC-GATGTCAT-AAAAACGC
ATCTAA-TACAACTTTCAACAACGGATCTCTTGGCTCTCGCATCGATGAAGAACGCAGCGAAATGCGATAAGTAATGTGA
ATTGCAGAATTCAGTGAATCATCGAATCTTTGAACGCACCTTGCGCCCTTTGGTATTCCGAAGGGCACGCCTGTTTGAGT
GTCGTGAAATTCTCAACCCTCCCCCCTTTTG--TTAGGTGGG------AACGGATTGGACTTGGAGGT-TCTTGCCGGTC
TT---------CGA-----TCGGCTCCTCTCAAATGCATTAGTGTCGTCCCATC---TGGACGTTAACCTTT-GGTGTGA
TAATTATCTACGCCGCTGGGA-GTCCTGATGTGA---------ACGGCTGCTTACAACCG-----TCTCCTTGTGGGACA
-ATTCATCGAAACTTGACCTCAAAT-CAGGCG-CCCCTAGTAACTGCGAGTGAAGCGGGAAAAGCTCAAATTTAAAATCT
GGCGGTCTTC-GGCCGTCCGAGTTGTAGTCTGGAGAAGTGTTTTCCGCGTTGGGCCGTGTACAAGTTTCCTGGAACGGAG
CGTCGTAGAGGGTGAGAATCCCGTCTTTGACACGGACCCCAA-TGCTTTGTGATGCGCTCTCAAAGAGTCGAGTTGTTTG
GGAATGCAGCTCAAAATGGGTGGTGAATTCCATCTAAAGCTAAATATTGGCGAGAGACCGATAGCGAACAAGTACCGTGA
GGGAAAGATGAAAAGCACTTTGGAAAGAGAGTTAAACAGTACGTGAAATTGTTGAAAGGGAAACGCTTGAAGTCAGTCGC
GTCGTCCGGGACTCAGCCTTGCTCTC--GCTTGGTGTACTTTCCGGTCGACGGGCCAGCATCAATTTTGACCGCGAGATA
AA-GTCGGAGGAAATGTGGCTCTT----TCGGGAGTGTTATAGTCCTTCGTCGCATGTCGCGGTTGGGATTGAGGAACTC
A-GCACGCCTTTAT---GG-CCGGGG-TTCGCCCACGTT--CGTGCTTAGGATGCT-GGCGTAATGGCTTTAAACGACCC
GTCTTGAAACACGGACCAAGGAGTCTAACATGCCTGCGAGTGTTCGGGTGGAAAACCCGTGCGCACAATGAAAGTGAAAG
TTGGGAACCCTGTCGTGGGGTGCACCGACGCCCGGACCAGAACTTCTGTGACGGATCTGCGGTAGAGCATGTATGTTGGG
ACCCGAAAGATGGTGAACTATGCCTGAATAGGGTGAAGCCAGAGGAAACTCTGGTGGAGGCTCGTAGCGATTCTGACGTG
CAAATCGATCGTCAAATTTGGGTATAGGGGCGAAAGACTAATCGA
>19_S_antarcticus_MR12098              
CATTAGAGAAAC-----ATAACGATCGAGGTTGTAGCTGGTCCCTCGG------GACATGTGCACG--CCTCCTTCATCC
ATC-------TACAC--CTGTGCACCTCTGCGTGGG---TCGGGAA------------------ACCGGC----------
----CTGCG--TCTTTTT---AATAAACTC---TTGTATGTCTT---AAGAATGTAAATGTC-GATGTCAT-AAAAACGC
ATCTAA-TACAACTTTCAACAACGGATCTCTTGGCTCTCGCATCGATGAAGAACGCAGCGAAATGCGATAAGTAATGTGA
ATTGCAGAATTCAGTGAATCATCGAATCTTTGAACGCACCTTGCGCCCTTTGGTATTCCGAAGGGCACGCCTGTTTGAGT
GTCGTGAAATTCTCAACCCTCCCCCCTTTTG--TTAGGTGGG------AACGGATTGGACTTGGAGGT-TCTTGCCGGTC
TT---------CGA-----TCGGCTCCTCTCAAATGCATTAGTGTCGTCCCATC---TGGACGTTAACCTTT-GGTGTGA
TAATTATCTACGCCGCTGGGA-GTCCTGATGTGA---------ACGG-TGCTTACAACCG-----TCTCCTTGTGGGACA
-ATTCATCGAAACT-GACCTCAAAT-CAG-CG-CCCCTAGTAACTGCGAGTGAAGCGGGAAAAGCTCAAATTTAAAATCT
GGCGGTCTTC-GGCCGTCCGAGTTGTAGTCTGGAGAAGTGTTTTCCGCGTTGGGCCGTGTACAAGTTTCCTGGAACGGAG
CGTCGTAGAGGGTGAGAATCCCGTCTTTGACACGGACCCCAA-TGCTTTGTGATGCGCTCTCAAAGAGTCGAGTTGTTTG
GGAATGCAGCTCAAAATGGGTGGTGAATTCCATCTAAAGCTAAATATTGGCGAGAGACCGATAGCGAACAAGTACCGTGA
GGGAAAGATGAAAAGCACTTTGGAAAGAGAGTTAAACAGTACGTGAAATTGTTGAAAGGGAAACGCTTGAAGTCAGTCGC
GTCGTCCGGGACTCAGCCTTGCTCTC--GCTTGGTGTACTTTCCGGTCGACGGGCCAGCATCAATTTTGACCGCGAGATA
AA-GTCGGAGGAAATGTGGCTCTT----TCGGGAGTGTTATAGTCCTTCGTCGCATGTCGCGGTTGGGATTGAGGAACTC
A-GCACGCCTTTAT---GG-CCGGGG-TTCGCCCACGTT--CGTGCTTAGGATGCT-GGCGTAATGGCTTTAAACGACCC
GTCTTGAAACACGGACCAAGGAGTCTAACATGCCTGCGAGTGTTCGGGTGGAAAACCCGTGCGCACAATGAAAGTGAAAG
TTGGGAACCCTGTCGTGGGGTGCACCGACGCCCGGACCAGAACTTCTGTGACGGATCTGCGGTAGAGCATGTATGTTGGG
ACCCGAAAGATGGTGAACTATGCCTGAATAGGGTGAAGCCAGAGGAAACTCTGGTGGAGGCTCGTAGCGATTCTGACGTG
CAAATCGATCGTCAAATTTGGGTATAGGGGCGAAAGACTAATCGA
>21_S_antarcticus_MR11265              
CATTAGAGAAAC-----ATAACGATCGAGGTTGTAGCTGGTCCCTCGG------GATATGTGCACG--CCTCCTTCATCC
ATC-------TACAC--CTGTGCACCTCTGCGTGGG---TCGGGAA------------------ACCGGC----------
----CTGCG--TCTTTTT---AATAAACTC---TTGTATGTCTT---AAGAATGTAAATGTC-GATGTCAT-AAAAACGC
ATCTAA-TACAACTTTCAACAACGGATCTCTTGGCTCTCGCATCGATGAAGAACGCAGCGAAATGCGATAAGTAATGTGA
ATTGCAGAATTCAGTGAATCATCGAATCTTTGAACGCACCTTGCGCCCTTTGGTATTCCGAAGGGCACGCCTGTTTGAGT
GTCGTGAAATTCTCAACCCTCCCCCCTTTTG--TTAGGTGGG------AACGGATTGGACTTGGAGGT-TCTTGCCGGTC
TT---------CGA-----TCGGCTCCTCCCAAATGCATTAGTGTCGTCCCATC---TGGACGTTAACCTTT-GGTGTGA
TAATTATCTACGCCGCTGGGA-GTCCTGATGTGA---------ACGG-TGCTTACAACCG-----TCTCCTTGTGGGACA
-ATTCATCGAAACT-GACCTCAAAT-CAGGCG-CCCCTAGTAACTGCGAGTGAAGCGGGAAAAGCTCAAATTTAAAATCT
GGCGGTCTTC-GGCCGTCCGAGTTGTAGTCTGGAGAAGTGTTTTCCGCGTTGGGCCGTGTACAAGTTTCCTGGAACGGAG
CGTCGTAGAGGGTGAGAATCCCGTCTTTGACACGGACCCCAA-TGCTTTGTGATGCGCTCTCAAAGAGTCGAGTTGTTTG
GGAATGCAGCTCAAAATGGGTGGTGAATTCCATCTAAAGCTAAATATTGGCGAGAGACCGATAGCGAACAAGTACCGTGA
GGGAAAGATGAAAAGCACTTTGGAAAGAGAGTTAAACAGTACGTGAAATTGTTGAAAGGGAAACGCTTGAAGTCAGTCGC
GTCGTCCGGGACTCAGCCTTGCTCTC--GCTTGGTGTACTTTCCGGTCGACGGGCCAGCATCAATTTTGACCGCGAGATA
AA-GTCGGAGGAAATGTGGCTCTT----TCGGGAGTGTTATAGTCCTTCGTCGCATGTCGCGGTTGGGATTGAGGAACTC
A-GCACGCCTTTAT---GG-CCGGGG-TTCGCCCACGTT--CGTGCTTAGGATGCT-GGCGTAATGGCTTTAAACGACCC
GTCTTGAAACACGGACCAAGGAGTCTAACATGCCTGCGAGTGTTCGGGTGGAAAACCCGTGCGCACAATGAAAGTGAAAG
TTGGGAACCCTGTCGTGGGGTGCACCGACGCCCGGACCAGAACTTTTGTGACGGATCTGCGGTAGAGCATGTATGTTGGG
ACCCGAAAGATGGTGAACTATGCCTGAATAGGGTGAAGCCAGAGGAAACTCTGGTGGAGGCTCGTAGCGATTCTGACGTG
CAAATCGATCGTCAAATTTGGGTATAGGGGCGAAAGACTAATCGA
>22_S_antarcticus_MR11857              
CATTAGAGAAAT-----ATAACGATCGAGGTTGTAGCTGGTCCCTCGG------GACATGTGCACG--CCTCCTTCATCC
ATC-------TACAC--CTGTGCACCTCTGCGTGGG---TCGGGAA------------------ACCGGC----------
----CTGCG--TCTTTTT---AATAAACTC---TTGTATGTCTT---AAGAATGTAAATGTC-GATGTCAT-AAAAACGC
ATCTAA-TACAACTTTCAACAACGGATCTCTTGGCTCTCGCATCGATGAAGAACGCAGCGAAATGCGATAAGTAATGTGA
ATTGCAGAATTCAGTGAATCATCGAATCTTTGAACGCACCTTGCGCCCTTTGGTATTCCGAAGGGCACGCCTGTTTGAGT
GTCGTGAAATTCTCAACCCTCCCCCCTTTTG--TTAGGTGGG------AACGGATTGGACTTGGAGGT-TCTTGCCGGTC
TT---------CGA-----TCGGCTCCTCTCAAATGCATTAGTGTCGTCCCATC---TGGACGTTAACCTTT-GGTGTGA
TAATTATCTACGCCGCTGGGA-GTCCTGATGTGA---------ACGG-TGCTTACAACCG-----TCTCCTTGTGGGACA
-ATTCATCGAAACT-GACCTCAAAT-CAGGCG-CCCCTAGTAACTGCGAGTGAAGCGGGAAAAGCTCAAATTTAAAATCT
GGCGGTCTTC-GGCCGTCCGAGTTGTAGTCTGGAGAAGTGTTTTCCGCGTTGGGCCGTGTACAAGTTTCCTGGAACGGAG
CGTCGTAGAGGGTGAGAATCCCGTCTTTGACACGGACCCCAA-TGCTTTGTGATGCGCTCTCAAAGAGTCGAGTTGTTTG
GGAATGCAGCTCAAAATGGGTGGTGAATTCCATCTAAAGCTAAATATTGGCGAGAGACCGATAGCGAACAAGTACCGTGA
GGGAAAGATGAAAAGCACTTTGGAAAGAGAGTTAAACAGTACGTGAAATTGTTGAAAGGGAAACGCTTGAAGTCAGTCGC
GTCGTCCGGGACTCAGCCTTGCTCTC--GCTTGGTGTACTTTCCGGTCGACGGGCCAGCATCAATTTTGATCGCGAGATA
AA-GTCGGAGGAAATGTGGCTCTT----TCGGGAGTGTTATAGTCCTTCGTCGCATGTCGCGGTTGGGATTGAGGAACTC
A-GCACGCCTTTAT---GG-CCGGGG-TTCGCCCACGTT--CGTGCTTAGGATGCT-GGCGTAATGGCTTTAAACGACCC
GTCTTGAAACACGGACCAAGGAGTCTAACATGCCTGCGAGTGTTCGGGTGGAAAACCCGTGCGCACAATGAAAGTGAAAG
TTGGGAACCCTGTCGTGGGGTGCACCGACGCCCGGACCAGAACTTCTGTGACGGATCTGCGGTAGAGCATGTATGTTGGG
ACCCGAAAGATGGTGAACTATGCCTGAATAGGGTGAAGCCAGAGGAAACTCTGGTGGAGGCTCGTAGCGATTCTGACGTG
CAAATCGATCGTCAAATTTGGGTATAGGGGCGAAAGACTAATCGA
>27_A_limonisporus_92582PDD            
CATTAGAGAAAT-----ATAACGATCGAGGTTGTAGCTGGTCCTTCGG------GACATGTGCACG--CCTCCTTCATCC
ATA-------TACAC--CTGTGCACCTCTGCGTGGG---TCGGGAA------------------ACCGGC----------
----CTGCG--TCTTTTT----ATAAACTC---TTGCATGTCTT---AAGAATGTCAATGTC-GATGTCAT-AAAA-CGC
ATCTAA-TACAACTTTCAACAACGGATCTCTTGGCTCTCGCATCGATGAAGAACGCAGCGAAATGCGATAAGTAATGTGA
ATTGCAGAATTCAGTGAATCATCGAATCTTTGAACGCACCTTGCGCCCTTTGGTATTCCGAAGGGCACGCCTGTTTGAGT
GTCGTGAAATTCTCAACCCTCCCCCCTTTTG--TTAGGTGGGG-----AACGGATTGGACTTGGAGGT-TCTTGCCGGCC
TT---------TGG-----TCGGCTCCTCTCAAATGCATTAGTGCCGTCTCATC---TGGACGTTAACCTTT-GGTGTGA
TAATTATCTACGCCGCTGGGA-GTCCTGATGTAA---------GCGG-TGCTTAAAACCG-----TCTCCTTGCGGGACA
-ATTCATCGAAACTTGACCTCAAAT-CAGGCGGCCCCTAGTAACTGCGAGTGAAGCGGGAAAAGCTCAAATTTAAAATCT
GGCGGTCTTC-GGCCGTCCGAGTTGTAGTCTGGAGAAGTGTTTTCCGCGTTGGACCGTGTACAAGTTTCCTGGAACGGAG
CGTCATAGAGGGTGAGAATCCCGTCTTTGACACGGACCCCAA-TGCTTTGTGATGCGCTCTCAAAGAGTCGAGTTGTTTG
GGAATGCAGCTCAAAATGGGTGGTGAATTCCATCTAAAGCTAAATATTGGCGAGAGACCGATAGCGAACAAGTACCGTGA
GGGAAAGATGAAAAGCACTTTGGAAAGAGAGTTAAACAGTACGTGAAATTGTTGAAAGGGAAACGCTTGAAGTCAGTCGC
GTCGTCCGGGACTCAGCCTTGCTTCC--GCTTGGTGTACTTTCCGGTCGACGGGCCAGCATCAATTTTGACCGCGAGATA
AA-GTCAGAGGAAATGTGGCTCTT----TCGGGAGTGTTATAGTCCTTTGTCGCATGTCGCGGTTGGGATTGAGGAATTC
A-GCACGCCTTTAT---GG-CCGGGG-TTCGCCCACGTT--CGTGCTTAGGATGCT-GGCGTAATGGCTTTAAACGACCC
GTCTTGAAACACGGACCAAGGAGTCTAACATGCCTGCGAGTGTTCGGGTGGAAAACCCGTGCGCACAATGAAAGTGAAAG
TTGGGAACCCTGTCGTGGGGTGCACCGACGCCCGGACCAGAACTTCTGTGACGGATCTGCGGTAGAGCATGTATGTTGGG
ACCCGAAAGATGGTGAACTATGCCTGAATAGGGTGAAGCCAGAGGAAACTCTGGTGGAGGCTCGTAGCGATTCTGACGTG
CAAATCGATCGTCAAATTTGGGTATAGGGGCGAAAGA????????
>28_A_limonisporus_96617PDD            
CATTAGAGAAAT-----ATAACGATCGAGGTTGTAGCTGGTCCTTCGG------GACATGTGCACG--CCTCCTTCATCC
ATA-------TACAC--CTGTGCACCTCTGCGTGGG---TCGGGAA------------------ACCGGC----------
----CTGCG--TCTTTTT----ATAAACTC---TTGCATGTCTT---AAGAATGTCAATGTC-GATGTCAT-AAAA-CGC
ATCTAA-TACAACTTTCAACAACGGATCTCTTGGCTCTCGCATCGATGAAGAACGCAGCGAAATGCGATAAGTAATGTGA
ATTGCAGAATTCAGTGAATCATCGAATCTTTGAACGCACCTTGCGCCCTTTGGTATTCCGAAGGGCACGCCTGTTTGAGT
GTCGTGAAATTCTCAACCCTCCCCCCTTTTG--TTAGGTGGGG-----AACGGATTGGACTTGGAGGT-TCTTGCCGGCC
TT---------TGG-----TCGGCTCCTCTCAAATGCATTAGTGCCGTCTCATC---TGGACGTTAACCTTT-GGTGTGA
TAATTATCTACGCCGCTGGGA-GTCCTGATGTAA---------GCGG-TGCTTAAAACCG-----TCTCCTTGCGGGACA
-ATTCATCGAAACTTGACCTCAAAT-CAGGCGGCCCCTAGTAACTGCGAGTGAAGCGGGAAAAGCTCAAATTTAAAATCT
GGCGGTCTTC-GGCCGTCCGAGTTGTAGTCTGGAGAAGTGTTTTCCGCGTTGGACCGTGTACAAGTTTCCTGGAACGGAG
CGTCATAGAGGGTGAGAATCCCGTCTTTGACACGGACCCCAA-TGCTTTGTGATGCGCTCTCAAAGAGTCGAGTTGTTTG
GGAATGCAGCTCAAAATGGGTGGTGAATTCCATCTAAAGCTAAATATTGGCGAGAGACCGATAGCGAACAAGTACCGTGA
GGGAAAGATGAAAAGCACTTTGGAAAGAGAGTTAAACAGTACGTGAAATTGTTGAAAGGGAAACGCTTGAAGTCAGTCGC
GTCGTCCGGGACTCAGCCTTGCTTCC--GCTTGGTGTACTTTCCGGTCGACGGGCCAGCATCAATTTTGACCGCGAGATA
AA-GTCAGAGGAAATGTGGCTCTT----TCGGGAGTGTTATAGTCCTTTGTCGCATGTCGCGGTTGGGATTGAGGAATTC
A-GCACGCCTTTAT---GG-CCGGGG-TTCGCCCACGTT--CGTGCTTAGGATGCT-GGCGTAATGGCTTTAAACGACCC
GTCTTGAAACACGGACCAAGGAGTCTAACATGCCTGCGAGTGTTCGGGTGGAAAACCCGTGCGCACAATGAAAGTGAAAG
TTGGGAACCCTGTCGTGGGGTGCACCGACGCCCGGACCAGAACTTCTGTGACGGATCTGCGGTAGAGCATGTATGTTGGG
ACCCGAAAGATGGTGAACTATGCCTGAATAGGGTGAAGCCAGAGGAAACTCTGGTGGAGGCTCGTAGCGATTCTGACGTG
CAAATCGATCGTCAAATTTGGGTATAGGGGCGAAAGA????????
>29_A_limonisporus_97004PDD            
CATTAGAGAAAT-----ATAACGATCGAGGTTGTAGCTGGTCCTTCGG------GACATGTGCACG--CCTCCTTCATCC
ATA-------TACAC--CTGTGCACCTCTGCGTGGG---TCGGGAA------------------ACCGGC----------
----CTGCG--TCTTTTT----ATAAACTC---TTGCATGTCTT---AAGAATGTCAATGTC-GATGTCAT-AAAA-CGC
ATCTAA-TACAACTTTCAACAACGGATCTCTTGGCTCTCGCATCGATGAAGAACGCAGCGAAATGCGATAAGTAATGTGA
ATTGCAGAATTCAGTGAATCATCGAATCTTTGAACGCACCTTGCGCCCTTTGGTATTCCGAAGGGCACGCCTGTTTGAGT
GTCGTGAAATTCTCAACCCTCCCCCCTTTTG--TTAGGTGGGG-----AACGGATTGGACTTGGAGGT-TCTTGCCGGCC
TT---------TGG-----TCGGCTCCTCTCAAATGCATTAGTGCCGTCTCATC---TGGACGTTAACCTTT-GGTGTGA
TAATTATCTACGCCGCTGGGA-GTCCTGATGTAA---------GCGG-TGCTTAAAACCG-----TCTCCTTGCGGGACA
-ATTCATCGAAACTTGACCTCAAAT-CAGGCGGCCCCTAGTAACTGCGAGTGAAGCGGGAAAAGCTCAAATTTAAAATCT
GGCGGTCTTC-GGCCGTCCGAGTTGTAGTCTGGAGAAGTGTTTTCCGCGTTGGACCGTGTACAAGTTTCCTGGAACGGAG
CGTCATAGAGGGTGAGAATCCCGTCTTTGACACGGACCCCAA-TGCTTTGTGATGCGCTCTCAAAGAGTCGAGTTGTTTG
GGAATGCAGCTCAAAATGGGTGGTGAATTCCATCTAAAGCTAAATATTGGCGAGAGACCGATAGCGAACAAGTACCGTGA
GGGAAAGATGAAAAGCACTTTGGAAAGAGAGTTAAACAGTACGTGAAATTGTTGAAAGGGAAACGCTTGAAGTCAGTCGC
GTCGTCCGGGACTCAGCCTTGCTTCC--GCTTGGTGTACTTTCCGGTCGACGGGCCAGCATCAATTTTGACCGCGAGATA
AA-GTCAGAGGAAATGTGGCTCTT----TCGGGAGTGTTATAGTCCTTTGTCGCATGTCGCGGTTGGGATTGAGGAATTC
A-GCACGCCTTTAT---GG-CCGGGG-TTCGCCCACGTT--CGTGCTTAGGATGCT-GGCGTAATGGCTTTAAACGACCC
GTCTTGAAACACGGACCAAGGAGTCTAACATGCCTGCGAGTGTTCGGGTGGAAAACCCGTGCGCACAATGAAAGTGAAAG
TTGGGAACCCTGTCGTGGGGTGCACCGACGCCCGGACCAGAACTTCTGTGACGGATCTGCGGTAGAGCATGTATGTTGGG
ACCCGAAAGATGGTGAACTATGCCTGAATAGGGTGAAGCCAGAGGAAACTCTGGTGGAGGCTCGTAGCGATTCTGACGTG
CAAATCGATCGTCAAATTTGGGTATAGGGGCGAAAGA????????
>30_A_limonisporus_16691PDD            
CATTAGAGAAAT-----ATAACGATCGAGGTTGTAGCTGGTCCTTCGG------GACATGTGCACG--CCTCCTTCATCC
ATA-------TACAC--CTGTGCACCTCTGCGTGGG---TCGGGAA------------------ACCGGC----------
----CTGCG--TCTTTTT----ATAAACTC---TTGCATGTCTT---AAGAATGTCAATGTC-GATGTCAT-AAAA-CGC
ATCTAA-TACAACTTTCAACAACGGATCTCTTGGCTCTCGCATCGATGAAGAACGCAGCGAAATGCGATAAGTAATGTGA
ATTGCAGAATTCAGTGAATCATCGAATCTTTGAACGCACCTTGCGCCCTTTGGTATTCCGAAGGGCACGCCTGTTTGAGT
GTCGTGAAATTCTCAACCCTCCCCCCTTTTG--TTAGGTGGGG-----AACGGATTGGACTTGGAGGT-TCTTGCCGGCC
TT---------TGG-----TCGGCTCCTCTCAAATGCATTAGTGCCGTCTCATC---TGGACGTTAACCTTT-GGTGTGA
TAATTATCTACGCCGCTGGGA-GTCCTGATGTAA---------GCGG-TGCTTAAAACCG-----TCTCCTTGCGGGACA
-ATTCATCGAAACTTGACCTCAAAT-CAGGCGGCCCCTAGTAACTGCGAGTGAAGCGGGAAAAGCTCAAATTTAAAATCT
GGCGGTCTTC-GGCCGTCCGAGTTGTAGTCTGGAGAAGTGTTTTCCGCGTTGGACCGTGTACAAGTTTCCTGGAACGGAG
CGTCATAGAGGGTGAGAATCCCGTCTTTGACACGGACCCCAA-TGCTTTGTGATGCGCTCTCAAAGAGTCGAGTTGTTTG
GGAATGCAGCTCAAAATGGGTGGTGAATTCCATCTAAAGCTAAATATTGGCGAGAGACCGATAGCGAACAAGTACCGTGA
GGGAAAGATGAAAAGCACTTTGGAAAGAGAGTTAAACAGTACGTGAAATTGTTGAAAGGGAAACGCTTGAAGTCAGTCGC
GTCGTCCGGGACTCAGCCTTGCTTCC--GCTTGGTGTACTTTCCGGTCGACGGGCCAGCATCAATTTTGACCGCGAGATA
AA-GTCAGAGGAAATGTGGCTCTT----TCGGGAGTGTTATAGTCCTTTGTCGCATGTCGCGGTTGGGATTGAGGAATTC
A-GCACGCCTTTAT---GG-CCGGGG-TTCGCCCACGTT--CGTGCTTAGGATGCT-GGCGTAATGGCTTTAAACGACCC
GTCTTGAAACACGGACCAAGGAGTCTAACATGCCTGCGAGTGTTCGGGTGGAAAACCCGTGCGCACAATGAAAGTGAAAG
TTGGGAACCCTGTCGTGGGGTGCACCGACGCCCGGACCAGAACTTCTGTGACGGATCTGCGGTAGAGCATGTATGTTGGG
ACCCGAAAGATGGTGAACTATGCCTGAATAGGGTGAAGCCAGAGGAAACTCTGGTGGAGGCTCGTAGCGATTCTGACGTG
CAAATCGATCGTCAAATTTGGGTATAGGGGCGAAAGA????????
>52_A_patagonicus_MA_Fungi_90714       
CATTAGAGAAAT-----ATAACGATCGAGGTTGTAGCTGGTCCTTCGG------GGCATGTGCACA--CCTCCTTCATCC
ATT-------TACAC--CTGTGCACCTCTGCGTGGG---TCGGGAA------------------ACCGGC----------
----CTGCG--TCTTTTT----ACAAACTC---TTGTATGTCTT---AAGAATGTAAATGTC-GATGTCAT-AAAA-CGC
ATCTAA-TACAACTTTCAACAACGGATCTCTTGGCTCTCGCATCGATGAAGAACGCAGCGAAATGCGATAAGTAATGTGA
ATTGCAGAATTCAGTGAATCATCGAATCTTTGAACGCACCTTGCGCCCTTTGGTATTCCGAAGGGCACGCCTGTTTGAGT
GTCGTGAAATTCTCAACCCTCCCCCCTTTTG--TTAGGTGGGG-----TACGGATTGGACTTGGAGGT-TCTTGCCGTTC
GT---------TGA-----TCGGCTCCTCTCAAATGCATTAGTGCCGTCTCGTC---TAGACGTTAACCTTT-GGTGTGA
TAATTATCTACGCCGCTGGGA-GTCTTGACAGAA---------GCGG-TGCTTACAACCG-----TCTCCTTGTGGGACA
-ATTCATCGAAACTTGACCTCAAAT-CAGGCGGCCCCTAGTAACTGCGAGTGAAGCGGGAAAAGCTCAAATTTAAAATCT
GGCGGTCTTC-GGCCGTCCGAGTTGTAGTCTGGAGAAGTGTTTTCCGCGTTGGACCGTGTACAAGTTTCCTGGAACGGAG
CGTCATAGAGGGTGAGAATCCCGTCTTTGACACGGACCCCAA-TGCTTTGTGATGCGCTCTCAAAGAGTCGAGTTGTTTG
GGAATGCAGCTCAAAATGGGTGGTGAATTCCATCTAAAGCTAAATATTGGCGAGAGACCGATAGCGAACAAGTACCGTGA
GGGAAAGATGAAAAGCACTTTGGAAAGAGAGTTAAACAGTACGTGAAATTGTTGAAAGGGAAACGCTTGAAGTCAGTCGC
GTCGGCCGGGACTCAGCCTTGCTTCC--GCTTGGTGTACTTTCCGGTCGACGGGCCAGCATCAATTTTGACCGCGAGATA
AA-GGCGGAGGGAATGTGGCTCTT----TCGGGAGTGTTATAGTCCTTTGTCGGATGTCGCGGCTGGGACTGAGGAATTC
A-GCACGCCTTTAT---GG-CCGGGG-TTCGCCCACGTA--CGTGCTTAGGATGCT-GGCGTAATGGCTTTAAACGACCC
GTCTTGAAACACGGACCAAGGAGTCTAACATGCCTGCGAGTGTTCGGGTGGAAAACCCGTGCGCGTAATGAAAGTGAAAG
TTGGGATCCCTGTCGTGGGGTGCACCGACGCCCGGACCAGACCTTCTGTGACGGATCTGCGGTGGAGCATGTATGTTGGG
ACCCGAAAGATGGTGAACTATGCCTGAATAGGGTGAAGCCAGAGGAAACTCTGGTGGAGGCTCGTAGCGATTCTGACGTG
CAAATCGATCGTCAAATTTGGGTATAGGGGCGAAAGA????????
>53_A_patagonicus_MA_Fungi_90713       
CATTAGAGAAAT-----ATAACGATCGAGGTTGTAGCTGGTCCTTCGG------GGCATGTGCACA--CCTCCTTCATCC
ATT-------TACAC--CTGTGCACCTCTGCGTGGG---TCGGGAA------------------ACCGGC----------
----CTGCG--TCTTTTT----ACAAACTC---TTGTATGTCTT---AAGAATGTAAATGTC-GATGTCAT-AAAA-CGC
ATCTAA-TACAACTTTCAACAACGGATCTCTTGGCTCTCGCATCGATGAAGAACGCAGCGAAATGCGATAAGTAATGTGA
ATTGCAGAATTCAGTGAATCATCGAATCTTTGAACGCACCTTGCGCCCTTTGGTATTCCGAAGGGCACGCCTGTTTGAGT
GTCGTGAAATTCTCAACCCTCCCCCCTTTTG--TTAGGTGGGG-----TACGGATTGGACTTGGAGGT-TCTTGCCGTTC
GT---------TGA-----TCGGCTCCTCTCAAATGCATTAGTGCCGTCTCGTC---TAGACGTTAACCTTT-GGTGTGA
TAATTATCTACGCCGCTGGGA-GTCTTGACAGAA---------GCGG-TGCTTACAACCG-----TCTCCTTGTGGGACA
-ATTCATCGAAACTTGACCTCAAAT-CAGGCGGCCCCTAGTAACTGCGAGTGAAGCGGGAAAAGCTCAAATTTAAAATCT
GGCGGTCTTC-GGCCGTCCGAGTTGTAGTCTGGAGAAGTGTTTTCCGCGTTGGACCGTGTACAAGTTTCCTGGAACGGAG
CGTCATAGAGGGTGAGAATCCCGTCTTTGACACGGACCCCAA-TGCTTTGTGATGCGCTCTCAAAGAGTCGAGTTGTTTG
GGAATGCAGCTCAAAATGGGTGGTGAATTCCATCTAAAGCTAAATATTGGCGAGAGACCGATAGCGAACAAGTACCGTGA
GGGAAAGATGAAAAGCACTTTGGAAAGAGAGTTAAACAGTACGTGAAATTGTTGAAAGGGAAACGCTTGAAGTCAGTCGC
GTCGGCCGGGACTCAGCCTTGCTTCC--GCTTGGTGTACTTTCCGGTCGACGGGCCAGCATCAATTTTGACCGCGAGATA
AA-GGCGGAGGGAATGTGGCTCTT----TCGGGAGTGTTATAGTCCTTTGTCGGATGTCGCGGCTGGGACTGAGGAATTC
A-GCACGCCTTTAT---GG-CCGGGG-TTCGCCCACGTA--CGTGCTTAGGATGCT-GGCGTAATGGCTTTAAACGACCC
GTCTTGAAACACGGACCAAGGAGTCTAACATGCCTGCGAGTGTTCGGGTGGAAAACCCGTGCGCGTAATGAAAGTGAAAG
TTGGGATCCCTGTCGTGGGGTGCACCGACGCCCGGACCAGACCTTCTGTGACGGATCTGCGGTGGAGCATGTATGTTGGG
ACCCGAAAGATGGTGAACTATGCCTGAATAGGGTGAAGCCAGAGGAAACTCTGGTGGAGGCTCGTAGCGATTCTGACGTG
CAAATCGATCGTCAAATTTGGGTATAGGGGCGAAAGA????????
>54_A_patagonicus_MA_Fungi_90711       
CATTAGAGAAAT-----ATAACGATCGAGGTTGTAGCTGGTCCTTCGG------GGCATGTGCACA--CCTCCTTCATCC
ATT-------TACAC--CTGTGCACCTCTGCGTGGG---TCGGGAA------------------ACCGGC----------
----CTGCG--TCTTTTT----ACAAACTC---TTGTATGTCTT---AAGAATGTAAATGTC-GATGTCAT-AAAA-CGC
ATCTAA-TACAACTTTCAACAACGGATCTCTTGGCTCTCGCATCGATGAAGAACGCAGCGAAATGCGATAAGTAATGTGA
ATTGCAGAATTCAGTGAATCATCGAATCTTTGAACGCACCTTGCGCCCTTTGGTATTCCGAAGGGCACGCCTGTTTGAGT
GTCGTGAAATTCTCAACCCTCCCCCCTTTTG--TTAGGTGGGG-----TACGGATTGGACTTGGAGGT-TCTTGCCGTTC
GT---------TGA-----TCGGCTCCTCTCAAATGCATTAGTGCCGTCTCGTC---TAGACGTTAACCTTT-GGTGTGA
TAATTATCTACGCCGCTGGGA-GTCTTGACAGAA---------GCGG-TGCTTACAACCG-----TCTCCTTGTGGGACA
-ATTCATCGAAACTTGACCTCAAAT-CAGGCGGCCCCTAGTAACTGCGAGTGAAGCGGGAAAAGCTCAAATTTAAAATCT
GGCGGTCTTC-GGCCGTCCGAGTTGTAGTCTGGAGAAGTGTTTTCCGCGTTGGACCGTGTACAAGTTTCCTGGAACGGAG
CGTCATAGAGGGTGAGAATCCCGTCTTTGACACGGACCCCAA-TGCTTTGTGATGCGCTCTCAAAGAGTCGAGTTGTTTG
GGAATGCAGCTCAAAATGGGTGGTGAATTCCATCTAAAGCTAAATATTGGCGAGAGACCGATAGCGAACAAGTACCGTGA
GGGAAAGATGAAAAGCACTTTGGAAAGAGAGTTAAACAGTACGTGAAATTGTTGAAAGGGAAACGCTTGAAGTCAGTCGC
GTCGGCCGGGACTCAGCCTTGCTTCC--GCTTGGTGTACTTTCCGGTCGACGGGCCAGCATCAATTTTGACCGCGAGATA
AA-GGCGGAGGGAATGTGGCTCTT----TCGGGAGTGTTATAGTCCTTTGTCGGATGTCGCGGCTGGGACTGAGGAATTC
A-GCACGCCTTTAT---GG-CCGGGG-TTCGCCCACGTA--CGTGCTTAGGATGCT-GGCGTAATGGCTTTAAACGACCC
GTCTTGAAACACGGACCAAGGAGTCTAACATGCCTGCGAGTGTTCGGGTGGAAAACCCGTGCGCGTAATGAAAGTGAAAG
TTGGGATCCCTGTCGTGGGGTGCACCGACGCCCGGACCAGACCTTCTGTGACGGATCTGCGGTGGAGCATGTATGTTGGG
ACCCGAAAGATGGTGAACTATGCCTGAATAGGGTGAAGCCAGAGGAAACTCTGGTGGAGGCTCGTAGCGATTCTGACGTG
CAAATCGATCGTCAAATTTGGGTATAGGGGCGAAAGA????????
>24_S_parmuliformis_SPG3104            
CATTAGAGAAAT-----ATAACGATCGAGGTTGTAGCTGGTCCTTCGG------GACATGTGCACG--CCTCCTTCATCC
ATT-------TACAC-CC-GTGCACCTCTGCGTGGG---CCG----------------------ACCGGC----------
----CTGCG--TCTTTTT----ATAAACTC---TTGTATGTCTT---AAGAATGTCCATGTC-GATGTCAT-AAAAACGC
ATCTAA-TACAACTTTCAACAACGGATCTCTTGGCTCTCGCATCGATGAAGAACGCAGCGAAATGCGATAAGTAATGTGA
ATTGCAGAATTCAGTGAATCATCGAATCTTTGAACGCACCTTGCGCCCTTTGGTATTCCGAAGGGCACGCCTGTTTGAGT
GTCGTGAAATTCTCAACCCTCCCTCCTTTTG--TTAGGTGGGG-----AACGGATTGGACTTGGAGGT-TCTTGCCGGTC
TT---------TGA-----TCGGCTCCTCTCAAATGCATTAGTGCCGTCTCATC---TGGACGTTAACCTTT-GGTGTGA
TAATTATCTACGCCGCTGGGA-GTCCTGGTGCAA---------GCGG-TGCTTACAACCG-----TCTCCTTGTGGGACA
-ATTCATCGAAACT-GACCTCAAAT-CAGGCGGCCCCTAGTAACTGCGAGTGAAGCGGGAAAAGCTCAAATTTAAAATCT
GGCGGTCTTC-GGCCGTCCGAGTTGTAGTCTGGAGAAGCGTTTTCCGCGTTGGACCGTGTACAAGTTTCCTGGAACGGAG
CGTCATAGAGGGTGAGAATCCCGTCTTTGACACGGACCCCAA-TGCTTTGTGATGCGCTCTCAAAGAGTCGAGTTGTTTG
GGAATGCAGCTCAAAATGGGTGGTGAATTCCATCTAAAGCTAAATATTGGCGAGAGACCGATAGCGAACAAGTACCGTGA
GGGAAAGATGAAAAGCACTTTGGAAAGAGAGTTAAACAGTACGTGAAATTGTTGAAAGGGAAACGCTTGAAGTCAGTCGC
GTCGTCCGGGACTCAGCCTTGCTCTC--GCTTGGTGTACTTTCCGGTCGACGGGCCAGCATCAATTTTGACCGCGAGATA
AA-GTCGGAGGAAATGTGGCTCTT----TCGGGAGTGTTATAGTCCTTCGTCGCATGTCGCGGTTGGGATTGAGGAACTC
A-GCACGCCTTTAT---GG-CCGGGG-TTCGCCCACGTT--CGTGCTTAGGATGCT-GGCGTAATGGCTTTAAACGACCC
GTCTTGAAACACGGACCAAGGAGTCTAACATGCCTGCGAGTGTTCGGGTGGAAAACCCGTGCGCACAATGAAAGTGAAAG
TTGGGAACCCTGTCGTGGGGTGCACCGACGCCCGGACCAGAACTTCTGTGACGGATCTGCGGTAGAGCATGTATGTTGGG
ACCCGAAAGATGGTGAACTATGCCTGAATAGGGTGAAGCCAGAGGAAACTCTGGTGGAGGCTCGTAGCGATTCTGACGTG
CAAATCGATCGTCAAATTTGGGTATAGGGGCGAAAGACTAATCGA
>92_A_parmuliformis_BCP3470            
CATTAGAGAAAT-----ATAACGATCGAGGTTGTAGCTGGTCCTTCGG------GACATGTGCACG--CCTCCTTCATCC
ATT-------TACAC-CC-GTGCACCTCTGCGTGGG---CCG----------------------ACCGGC----------
----CTGCG--TCTTTTT----ATAAACTC---TTGTATGTCTT---AAGAATGTCAATGTC-GATGTCAT-AAAA-CGC
ATCTAA-TACAACTTTCAACAACGGATCTCTTGGCTCTCGCATCGATGAAGAACGCAGCGAAATGCGATAAGTAATGTGA
ATTGCAGAATTCAGTGAATCATCGAATCTTTGAACGCACCTTGCGCCCTTTGGTATTCCGAAGGGCACGCCTGTTTGAGT
GTCGTGAAATTCTCAACCCTCCCCCCTTTTG--TTAGGTGGGG-----AACGGATTGGACTTGGAGGT-TCTTGCCGGTC
TT---------TGA-----TCGGCTCCTCTCAAATGCATTAGTGCCGTCTCATC---TGGACGTTAACCTTT-GGTGTGA
TAATTATCTACGCCGCTGGGA-GTCCTGGTGCAA---------GCGG-TGCTTACAACCG-----TCTCCTTGTGGGACA
-ATTCATCGAAACTTGACCTCAAAT-CAGGCGG???????????????????????????????????????????????
????????????????????????????????????????????????????????????????????????????????
????????????????????????????????????????????????????????????????????????????????
????????????????????????????????????????????????????????????????????????????????
????????????????????????????????????????????????????????????????????????????????
????????????????????????????????????????????????????????????????????????????????
????????????????????????????????????????????????????????????????????????????????
????????????????????????????????????????????????????????????????????????????????
????????????????????????????????????????????????????????????????????????????????
????????????????????????????????????????????????????????????????????????????????
????????????????????????????????????????????????????????????????????????????????
?????????????????????????????????????????????
>93_A_parmuliformis_BCP3537            
CATTAGAGAAAT-----ATAACGATCGAGGTTGTAGCTGGTCCTTCGG------GACATGTGCACG--CCTCCTTCATCC
ATT-------TACAC-CC-GTGCACCTCTGCGTGGG---CCG----------------------ACCGGC----------
----CTGCG--TCTTTTT----ATAAACTC---TTGTATGTCTT---AAGAATGTCAATGTC-GATGTCAT-AAAA-CGC
ATCTAA-TACAACTTTCAACAACGGATCTCTTGGCTCTCGCATCGATGAAGAACGCAGCGAAATGCGATAAGTAATGTGA
ATTGCAGAATTCAGTGAATCATCGAATCTTTGAACGCACCTTGCGCCCTTTGGTATTCCGAAGGGCACGCCTGTTTGAGT
GTCGTGAAATTCTCAACCCTCCCCCCTTTTG--TTAGGTGGGG-----AACGGATTGGACTTGGAGGT-TCTTGCCGGTC
TT---------TGA-----TCGGCTCCTCTCAAATGCATTAGTGCCGTCTCATC---TGGACGTTAACCTTT-GGTGTGA
TAATTATCTACGCCGCTGGGA-GTCCTGGTGCAA---------GCGG-TGCTTACAACCG-----TCTCCTTGTGGGACA
-ATTCATCGAAACTTGACCTCAAAT-CAGGCGG???????????????????????????????????????????????
????????????????????????????????????????????????????????????????????????????????
????????????????????????????????????????????????????????????????????????????????
????????????????????????????????????????????????????????????????????????????????
????????????????????????????????????????????????????????????????????????????????
????????????????????????????????????????????????????????????????????????????????
????????????????????????????????????????????????????????????????????????????????
????????????????????????????????????????????????????????????????????????????????
????????????????????????????????????????????????????????????????????????????????
????????????????????????????????????????????????????????????????????????????????
????????????????????????????????????????????????????????????????????????????????
?????????????????????????????????????????????
>94_A_parmuliformis_BCP3466            
CATTAGAGAAAT-----ATAACGATCGAGGTTGTAGCTGGTCCTTCGG------GACATGTGCACG--CCTCCTTCATCC
ATT-------TACAC-CC-GTGCACCTCTGCGTGGG---CCG----------------------ACCGGC----------
----CTGCG--TCTTTTT----ATAAACTC---TTGTATGTCTT---AAGAATGTCAATGTC-GATGTCAT-AAAA-CGC
ATCTAA-TACAACTTTCAACAACGGATCTCTTGGCTCTCGCATCGATGAAGAACGCAGCGAAATGCGATAAGTAATGTGA
ATTGCAGAATTCAGTGAATCATCGAATCTTTGAACGCACCTTGCGCCCTTTGGTATTCCGAAGGGCACGCCTGTTTGAGT
GTCGTGAAATTCTCAACCCTCCCCCCTTTTG--TTAGGTGGGG-----AACGGATTGGACTTGGAGGT-TCTTGCCGGTC
TT---------TGA-----TCGGCTCCTCTCAAATGCATTAGTGCCGTCTCATC---GGGACGTTAACCTTTTGGTGTGA
TAATTATCTACGCCGCTGGGA-GTCCTGGTGCAA---------GCGG-TGCTTACAACCG-----TCTCCTTGTGGGACA
-ATTCATCGAAACTTGACCTCAAAT-CAGGCGG???????????????????????????????????????????????
????????????????????????????????????????????????????????????????????????????????
????????????????????????????????????????????????????????????????????????????????
????????????????????????????????????????????????????????????????????????????????
????????????????????????????????????????????????????????????????????????????????
????????????????????????????????????????????????????????????????????????????????
????????????????????????????????????????????????????????????????????????????????
????????????????????????????????????????????????????????????????????????????????
????????????????????????????????????????????????????????????????????????????????
????????????????????????????????????????????????????????????????????????????????
????????????????????????????????????????????????????????????????????????????????
?????????????????????????????????????????????
>31_A_stratosus_SPG3219                
CATTAATGAAAT------TATGACTGAG-GTTGTAGCTGGTCCCCT-----GGGG-CATGTGCACG--CCTCTTTCAC-A
ATCCACACA-CACAC--CTGTGCACCTTTGCGTGTG--GTCGGG-------------------GCTTCACG-----GCCA
CGGCTCGCG--TCTTTTTA---ACAAACCT--TTTGTATGTCTT---AAGAATGTCTA--CTTGATGTAAT-AAAA-CGC
ATCTAA-TACAACTTTCAACAACGGATCTCTTGGCTCTCGCATCGATGAAGAACGCAGCGAAATGCGATAAGTAATGTGA
ATTGCAGAATTCAGTGAATCATCGAATCTTTGAACGCACCTTGCGCCCTTTGGTATTCCGAAGGGCACACCTGTTTGAGT
GTCGTGAAATTCTCAACCCT-CTTCACTTG---TTTGTGAGAAG-------GGATTGGACTTGGAGGCTTT--GCCGG--
------------CTTTGCTTCGGCTCCTCTCAAATGCATTAGTG-TGCGTCTCGTTTGA---GAGTAC-GCTTGGTGTGA
TAATTATCTACGCCA------CGCGCT-TTCGTCC-TGCGTTGACCACGCTT-CAAACCG-----TCCGAGAG-GACA--
--ATCATCGAAA-CTGACCTCAAAT-TCCGGGGCCCCTAGTAACTGCGAGTGAAGCGGGAAAAGCTCAAATTTAAAATCT
GGCGGTCTCC-GGCCGTCCGAGTTGTAGTCTGGAGAAGCGTTTTCCGCGTTGGACCGTGTACAAGTTTCCTGGAACGGAG
CGTCGTAGAGGGTGAGAATCCCGTCTTTGACACGGACCCC-AATGCTTTGTGATGCGCTCTCAAAGAGTCGAGTTGTTTG
GGAATGCAGCTCAAAATGGGTGGTGAATTCCATCTAAAGCTAAATATTGGCGAGAGACCGATAGCGAACAAGTACCGTGA
GGGAAAGATGAAAAGCACTTTGGAAAGAGAGTTAAACAGTACGTGAAATTGTTGAAAGGGAAACGCTTGAAGTCAGTCGC
GTCGGCCGGGACTCAGCCTTGC--ATTCGCTTGGTGTACTTTCCGGTCGACGGGCCAGCATCAGTTTTGACCGCGGGATA
AA-GGCGAGGGGAATGTGGCTCTC----TCGGGAGTGTTATAGCCCTTTGTCAGATGTCGCGGTTGGGACTGAGGAACTC
A-GCACGCCTTTAT---GG-CCGGGG-TTCGCCCACGTA--CGTGCTTAGGATGCT-GGCGTAATGGCTTTAAACGACCC
GTCTTGAAACACGGACCAAGGAGTCTAACATGCCTGCGAGTGTTCGGGTGGAAAACCCGTGCGCGTAATGAAAGTGAAAG
TTGGGAACCCTGGCGTGGGGTGCACCGACGCCCGGACCAGAACTTTTGTGACGGATCTGCGGTAGAGCATGTATGTTGGG
ACCCGAAAGATGGTGAACTATGCCTGAATAGGGTGAAGCCAGAGGAAACTCTGGTGGAGGCTCGTAGCGATTCTGACGTG
CAAATCGATCGTCAAATTTGGGTATAGGGGCGAAAGACTAATCGA
>36_A_verrucosporus_BJFC_He4491T       
CATTAATGAACTT-TC-AATCGTTCGAGTGTTGTAGCTGGCCCT-TTA--CCGGG-CATGTGCACG--CCTCGTTCGAGA
AATCCATCA-CACCC-CTTGTGCACCTTTGCGTGAG------------------------GGGGCTTCGGTGAAAACCGG
GGGCCCTCGCGTCTTTTTA-TCACAAACCCC-TTTGTATGTTTTCAAAAGAATGTCTT-ACTCGATGTCAT-AAAAACGC
ATCTTA-TACAACTTTCAACAACGGATCTCTTGGCTCTCGCATCGATGAAAAACGCAGCGAAATGCGATAAGTAATGTGA
ATTGCAGAATTCAGTGAATCATCGAATCTTTGAACGCACCTTGCGCCCTTTGGTATTCCGAAGGGCACACCTGTTTGAGT
GTCGTGAAATTCTCAACCCTCCCTCGCTTTTTCTGCGATGGGGTTG-----GGCTTGGACTTGGAGGT-CTT-GCCGG--
-------------TCCCCATCGGCTCCTCTCAAATGCATTAGTG-CGTCTT--GTTGCG-ACGCGC--------------
--------------------------------------------------------------------------------
---------------------------------CCCCTAGTAACTGCGAGTGAAGCGGGAAAAGCTCAAATTTAAAATCT
GGCGGTCTCT-GGCCGTCCGAGTTGTAGTCTGGAGAAGCGTTTTCCGCGTTGGACCGTGTACAAGTTTCCTGGAACGGAG
CGTCATAGAGGGTGAGAATCCCGTCTTTGACACGGACCCC-AATGCTTTGTGATGCGCTCTCAAAGAGTCGAGTTGTTTG
GGAATGCAGCTCAAAATGGGTGGTGAATTCCATCTAAAGCTAAATATTGGCGAGAGACCGATAGCGAACAAGTACCGTGA
GGGAAAGATGAAAAGCACTTTGGAAAGAGAGTTAAACAGTACGTGAAATTGTTGAAAGGGAAACGCTTGAAGTCAGTCGC
GTCGGCCGGGACTCAGCCTTGC--ATCAGCTTGGTGTACTTTCCGGTCGACGGGCCAGCATCAGTTTCGACCGCGGGATA
AA-GGCGTTGGGAATGTGGCTCTC----TCGGGAGTGTTATAGCCCTTCGTCGGATGCCGCGGTTGGGTCTGAGGAATTC
A-GCACGCCTTCAT---GG-CCGGGG-TTCGCCCACGTA--CGTGCTTAGGATGCT-GGCGTAATGGCTTTAAACGACCC
GTCTTGAAACACGGACCAAGGAGTCTAACATGCCTGCGAGTGTTCGGGTGGAAAACCCGTGCGCGTAATGAAAGTGAAAG
TTGGGATCCCTGTCGTGGGGTGCACCGACGCCCGGACCAGACCTTCTGTGACGGATCTGCGGTAGAGCATGTATGTTGGG
ACCCGAAAGATGGTGAACTATGCCTGAATAGGGTGAAGCCAGAGGAAACTCTGGTGGAGGCTCGTAGCGATTCTGACGTG
CAAATCGATCGTCAAATTTGGGTATAGGGGCGAAAGACTAATCGA
>40_A_cerussatus_SPG3031               
CATTAATGAAAT------TCTGACTGAG-GTTGTAGCTGGCCCT-TCA--CCGGG-CATGTGCACG--CCTCTTTCAC-C
GTCCACACA-CAC----CTGTGCACCTTTGCGTGAG-TTTTGGGAACCGG-TCGGGTGGCAACGCCCTTCT-GCAGTACC
GGACTCGCG--TCCTTTTT---ACAAACTC--TATGTATGTCTT---AAGAATGTCTA--CTCGATGTAAT-AAAA-CGC
ATCTAA-TACAACTTTCAACAACGGATCTCTTGGCTCTCGCATCGATGAAGAACGCAGCGAAATGCGATAAGTAATGTGA
ATTGCAGAATTCAGTGAATCATCGAATCTTTGAACGCACCTTGCGCCCTTTGGTATTCCGAAGGGCACACCTGTTTGAGT
GTCGTGAAACTCTCAACCCT-CCTCACTTT---TGTGACGGCTG-------GGCTTGGACTTGGAGGCTTT--GCCGGAC
CG---------TCTGCGT-TCGGCTCCTCTCAAATGAATTAGTA-CGTCTC--GTTGCG---ATGTAC-CCTCGGTGTGA
TAATTATCTACGCTG---TGGTGTGCT-TGCTTCT-GGTGGG-AC-GCGCTT-CAAACCG-----TCCGAAAG-GACA--
-CTTCATCGTAA-CTGACCTCAA-T-CAGTGAACCCCTAGTAACTGCGAGTGAAGCGGGAAAAGCTCAAATTTAAAATCT
GGCGGTCTCC-GGCCGTCCGAGTTGTAGTCTGGAGAAGCGTTTTCCGCGTTGGACCGTGTACAAGTTTCCTGGAACGGAG
CGTCATAGAGGGTGAGAATCCCGTCTTTGACACGGACCCC-AATGCTTTGTGATGCGCTCTCAAAGAGTCGAGTTGTTTG
GGAATGCAGCTCAAAATGGGTGGTGAATTCCATCTAAAGCTAAATATTGGCGAGAGACCGATAGCGAACAAGTACCGTGA
GGGAAAGATGAAAAGCACTTTGGAAAGAGAGTTAAACAGTACGTGAAATTGTTGAAAGGGAAACGATTGAAGTCAGTCGC
GTCGGCCGGGACTCAGCCTTGC--ATTCGCTTGGTGTACTTTCCGGTCGACGGGCCAGCATCAGTTTTGACCGCGAGACA
AA-GGCGGAGGGAATGTGGCTCTT----TCGGGAGTGTTATAGCCCTTCGTCGCATGTCGCGGTGGGGACTGAGGACCGC
A-GCACGCCTTTAT---GG-CCGGGG-TTCGCCCACGTA--CGTGCTTAGGATGCT-GGCGTAATGGCTTTAAACGACCC
GTCTTGAAACACGGACCAAGGAGTCTAACATGCCTGCGAGTGTTCGGGTGGAAAACCCGTGCGCGTAATGAAAGTGAAAG
TTGGGATCCCTGTCGTGGGGTGCACCGACGCCCGGACCAGACCTTCTGTGACGGATCTGCGGTAGAGCATGTATGTTGGG
ACCCGAAAGATGGTGAACTATGCCTGAATAGGGTGAAGCCAGAGGAAACTCTGGTGGAGGCTCGTAGCGATTCTGACGTG
CAAATCGATCGTCAAATTTGGGTATAGGGGCGAAAGACTAATCGA
>41_A_cerussatus_SPG3353               
CATTAATGAAAT------TCTGACTGAG-GTTGTAGCTGGCCCT-TCA--CCGGG-CATGTGCACG--CCTCTTTCAC-C
GTCCACACA-CAC----CTGTGCACCTTTGCGTGAG-TTTTGGGAACCGG-TCGGGTGGCAACGCCCTTCT-GCAGTACC
GGACTCGCG--TCCTTTTT---ACAAACTC--TATGTATGTCTT---AAGAATGTCTA--CTCGATGTAAT-AAAA-CGC
ATCTAA-TACAACTTTCAACAACGGATCTCTTGGCTCTCGCATCGATGAAGAACGCAGCGAAATGCGATAAGTAATGTGA
ATTGCAGAATTCAGTGAATCATCGAATCTTTGAACGCACCTTGCGCCCTTTGGTATTCCGAAGGGCACACCTGTTTGAGT
GTCGTGAAACTCTCAACCCT-CCTCACTTT---TGTGACGGCTG-------GGCTTGGACTTGGAGGCTTT--GCCGGAC
CG---------TCTGCGT-TCGGCTCCTCTCAAATGAATTAGTA-CGTCTC--GTTGCG---ATGTAC-CCTCGGTGTGA
TAATTATCTGCGCTG---TGGTGTGCT-TGCTTCT-GGTGGG-AC-GCGCTT-CAAACCG-----TCCGAAAG-GACA--
-CTTCATCGTAA-CTGACCTCAAAT-CAGGTG-CCCCTAGTAACTGCGAGTGAAGCGGGAAAAGCTCAAATTTAAAATCT
GGCGGTCTCC-GGCCGTCCGAGTTGTAGTCTGGAGAAGCGTTTTCCGCGTTGGACCGTGTACAAGTTTCCTGGAACGGAG
CGTCATAGAGGGTGAGAATCCCGTCTTTGACACGGACCCC-AATGCTTTGTGATGCGCTCTCAAAGAGTCGAGTTGTTTG
GGAATGCAGCTCAAAATGGGTGGTGAATTCCATCTAAAGCTAAATATTGGCGAGAGACCGATAGCGAACAAGTACCGTGA
GGGAAAGATGAAAAGCACTTTGGAAAGAGAGTTAAACAGTACGTGAAATTGTTGAAAGGGAAACGATTGAAGTCAGTCGC
GTCGGCCGGGACTCAGCCTTGC--ATTCGCTTGGTGTACTTTCCGGTCGACGGGCCAGCATCAGTTTTGACCGCGAGACA
AA-GGCGGAGGGAATGTGGCTCTT----TCGGGAGTGTTATAGCCCTTCGTCGCATGTCGCGGTGGGGACTGAGGACCGC
A-GCACGCCTTTAT---GG-CCGGGG-TTCGCCCACGTA--CGTGCTTAGGATGCT-GGCGTAATGGCTTTAAACGACCC
GTCTTGAAACACGGACCAAGGAGTCTAACATGCCTGCGAGTGTTCGGGTGGAAAACCCGTGCGCGTAATGAAAGTGAAAG
TTGGGATCCCTGTCGTGGGGTGCACCGACGCCCGGACCAGACCTTCTGTGACGGATCTGCGGTAGAGCATGTATGTTGGG
ACCCGAAAGATGGTGAACTATGCCTGAATAGGGTGAAGCCAGAGGAAACTCTGGTGGAGGCTCGTAGCGATTCTGACGTG
CAAATCGATCGTCAAATTTGGGTATAGGGGCGAAAGACTAATCGA
>42_A_cerussatus_SPG3004               
CATTAATGAAAT------TCTGACTGAG-GTTGTAGCTGGCCCT-TCA--CAGGG-CATGTGCACA--CCTCTTTCAC-A
ATCCACACA-CAC----CTGTGCACCTTTGCGTGAG-TTTCGGGAATCGG-TCGGGTGGCAACGCCCTTCT-GTAGTACC
GGGCTCGCG--TCCTTTTC---ACAAACTC--TATGTATGTCTT---AAGAATGTCTA--CTCGATGTAAT-AAAA-CGC
ATCTAA-TACAACTTTCAACAACGGATCTCTTGGCTCTCGCATCGATGAAGAACGCAGCGAAATGCGATAAGTAATGTGA
ATTGCAGAATTCAGTGAATCATCGAATCTTTGAACGCACCTTGCGCCCTTTGGTATTCCGAAGGGCACACCTGTTTGAGT
GTCGTGAAATTCTCAACCCT-CCTCACTTT---TGTGACGGCTG-------GGCTTGGACTTGGAGGCTTT--GCCGGAC
CA---------TCTGCGT-TCGGCTCCTCTCAAATGCATTAGTA-CGTCTC--GTTGCG---ATGTAC-CCTCGGTGTGA
TAAT-ATCTACGCTG---TGGTGTGCT-TGCTTCT-GGTGGG-AC-GCGCTT-CAAACCG-----TCCGAAAG-GACA--
-CT-CATCGAAA-TTGACCTCAAAT-CAGGGG-CCCCTAGTAACTGCGAGTGAAGCGGGAAAAGCTCAAATTTAAAATCT
GGCGGTCTCC-GGCCGTCCGAGTTGTAGTCTGGAGAAGCGTTTTCCGCGTTGGACCGTGTACAAGTTTCCTGGAACGGAG
CGTCATAGAGGGTGAGAATCCCGTCTTTGACACGGACCCC-AATGCTTTGTGATGCGCTCTCAAAGAGTCGAGTTGTTTG
GGAATGCAGCTCAAAATGGGTGGTGAATTCCATCTAAAGCTAAATATTGGCGAGAGACCGATAGCGAACAAGTACCGTGA
GGGAAAGATGAAAAGCACTTTGGAAAGAGAGTTAAACAGTACGTGAAATTGTTGAAAGGGAAACGCTTGAAGTCAGTCGC
GTCGTCCGGGACTCAGCCTTGC--ATTCGCTTGGTGTACTTTCCGGTCGACGGGCCAGCATCAGTTTTGACCGCGAGACA
AA-GGCGGAGGGAATGTGGCTCTT----TCGGGAGTGTTATAGCCCTTCGTCGCATGTCGCGGTTGGGACTGAGGACCGC
A-GCACGCCTTTAT---GG-CCGGGG-TTCGCCCACGTA--CGTGCTTAGGATGCT-GGCGTAATGGCTTTAAACGACCC
GTCTTGAAACACGGACCAAGGAGTCTAACATGCCTGCGAGTGTTCGGGTGGAAAACCCGTGCGCGTAATGAAAGTGAAAG
TTGGGATCCCTGTCGTGGGGTGCACCGACGCCCGGACCAGACCTTTTGTGACGGATCTGCGGTAGAGCATGTATGTTGGG
ACCCGAAAGATGGTGAACTATGCCTGAATAGGGTGAAGCCAGAGGAAACTCTGGTGGAGGCTCGTAGCGATTCTGACGTG
CAAATCGATCGTCAAATTTGGGTATAGGGGCGAAAGACTAATCGA
>43_A_cerussatum_He201209203           
CATTAATGAAAT------TCTGACTGAG-GTTGTAGCTGGCCCT-TCA--CCGGG-CATGTGCACA--CCTCTTTCAC-A
ATCCACACA-CAC----CTGTGCACCTTTGCGTGAG-TTTTGGGAACCGGGTCGGGTGGCAACGCCCTTCTCGTAGTACC
GGGCTCGCG--TCCTTTTC---ACAAACTC--TATGTATGTCTT---AAGAATGTCTA--CTCGATGTAAT-AAAA-CGC
ATCTAA-TACAACTTTCAACAACGGATCTCTTGGCTCTCGCATCGATGAAGAACGCAGCGAAATGCGATAAGTAATGTGA
ATTGCAGAATTCAGTGAATCATCGAATCTTTGAACGCACCTTGCGCCCTTTGGTATTCCGAAGGGCACACCTGTTTGAGT
GTCGTGAAATTCTCAACCCT-CCTCACTTT---TGTGACGGCTG-------GGCTTGGACTTGGAGGCTTT--GCCGGAC
CG---------TTCGCGT-TCGGCTCCTCTCAAATGCATTAGTA-CGTCTT--GTTGCG---ATGTGC-CCTCGGTGTGA
TAATTATCTACGCTG---TGGTGTGCT-TGCTTCT-GGTGAG-AC-GCGCTT-CAAACCG-----TCCGAAAG-GACA--
-CTTCATCGAAACTTGACCTCAAAT-CAGGTGGCCCCTAGTAACTGCGAGTGAAGCGGGAAAAGCTCAAATTTAAAATCT
GGCGGTCTCC-GGCCGTCCGAGTTGTAGTCTGGAGAAGCGTTTTCCGCGTTGGACCGTGTACAAGTTTCCTGGAACGGAG
CGTCATAGAGGGTGAGAATCCCGTCTTTGACACGGACCCC-AATGCTTTGTGATGCGCTCTCAAAGAGTCGAGTTGTTTG
GGAATGCAGCTCAAAATGGGTGGTGAATTCCATCTAAAGCTAAATATTGGCGAGAGACCGATAGCGAACAAGTACCGTGA
GGGAAAGATGAAAAGCACTTTGGAAAGAGAGTTAAACAGTACGTGAAATTGTTGAAAGGGAAACGCTTGAAGTCAGTCGC
GTCGGCCGGGACTCAGCCTTGC--ATTCGCTTGGTGTACTTTCCGGTCGACGGGCCAGCATCAGTTTTGACCGCGAGACA
AA-GGCGGAGGGAATGTGGCTCTT----TCGGGAGTGTTATAGCCCTTCGTCACATGTCGCGGTTGGGACTGAGGACCGC
A-GCACGCCTTTAT---GG-CCGGGG-TTCGCCCACGTA--CGTGCTTAGGATGCT-GGCGTAATGGCTTTAAACGACCC
GTCTTGAAACACGGACCAAGGAGTCTAACATGCCTGCGAGTGTTCGGGTGGAAAACCCGTGCGCGTAATGAAAGTGAAAG
TTGGGATCCCTGTCGTGGGGTGCACCGACGCCCGGACCAGACCTTTTGTGACGGATCTGCGGTAGAGCATGTATGTTGGG
ACCCGAAAGATGGTGAACTATGCCTGAATAGGGTGAAGCCAGAGGAAACTCTGGTGGAGGCTCGTAGCGATTCTGACGTG
CAAATCGATCGTCAAATTTGGGTATAGGGGCGAAAGACTAATCGA
>45_A_cerussatum_He2208                
CATTAATGAA-T------TCTGACTGAG-GTTGTAGCTGGCCCT-TCA--CCGGG-CATGTGCACG--CCTCTTTCAC-A
ATCCACACA-CAC----CTGTGCACCTTTGCGTGAG-TCTCGGGAATCGG-TCGGGTGGCAACGCCTTTCT-GTAGTACC
GGGCTCGCG--TCTTTTTC---ACAAACTC--TATGTATGTCTT---AAGAATGTCTA--CTCGATGTAAT-AAAA-CGC
ATCTAA-TACAACTTTCAACAACGGATCTCTTGGCTCTCGCATCGATGAAGAACGCAGCGAAATGCGATAAGTAATGTGA
ATTGCAGAATTCAGTGAATCATCGAATCTTTGAACGCACCTTGCGCCCTTTGGTATTCCGAAGGGCACACCTGTTTGAGT
GTCGTGAAATTCTCAACCCT-CCTCACTTT---TGTGACGGCTG-------GGCTTGGACTTGGAGGCTTT--GCCGGAC
CG---------TCTGCGT-TCGGCTCCTCTCAAATGCATTAGTA-CGTCTC--GTTGCG---ATGTAC-CCTCGGTGTGA
TAATTATCTACGCTG---TGGTGTGCT-TGCTTCT-GGTGGG-AC-GCGCTT-CAAACCG-----TCCGAAAG-GACA--
-CTTCATCGAAACTTGACCTCAAAT-CAGGTGGCCCCTAGTAACTGCGAGTGAAGCGGGAAAAGCTCAAATTTAAAATCT
GGCGGTCTCC-GGCCGTCCGAGTTGTAGTCTGGAGAAGCGTTTTCCGCGTTGGACCGTGTACAAGTTTCCTGGAACGGAG
CGTCATAGAGGGTGAGAATCCCGTCTTTGACACGGACCCC-AATGCTTTGTGATGCGCTCTCAAAGAGTCGAGTTGTTTG
GGAATGCAGCTCAAAATGGGTGGTGAATTCCATCTAAAGCTAAATATTGGCGAGAGACCGATAGCGAACAAGTACCGTGA
GGGAAAGATGAAAAGCACTTTGGAAAGAGAGTTAAACAGTACGTGAAATTGTTGAAAGGGAAACGCTTGAAGTCAGTCGC
GTCGGCCGGGACTCAGCCTTGC--ATTTGCTTGGTGTACTTTCCGGTCGACGGGCCAGCATCAGTTTTGACCGCGAGACA
AA-GGCGGAGGGAATGTGGCTCTT----TCGGGAGTGTTATAGCCCTCCGTCGCATGTCGCGGTTGGGACTGAGGACCGC
A-GCACGCCTTTAT---GG-CCGGGG-TTCGCCCACGTA--CGTGCTTAGGATGCT-GGCGTAATGGCTTTAAACGACCC
GTCTTGAAACACGGACCAAGGAGTCTAACATGCCTGCGAGTGTTCGGGTGGAAAACCCGTGCGCGTAATGAAAGTGAAAG
TTGGGATCCCTGTCGTGGGGTGCACCGACGCCCGGACCAGACCTTTTGTGACGGATCTGCGGTAGAGCATGTATGTTGGG
ACCCGAAAGATGGTGAACTATGCCTGAATAGGGTGAAGCCAGAGGAAACTCTGGTGGAGGCTCGTAGCGATTCTGACGTG
CAAATCGATCGTCAAATTTGGGTATAGGGGCGAAAGACTAATCGA
>49_A_thailandicus_BJFC_He4099_T       
CATTAATGAACT------TCTGACTGAG-GTTGTAGCTGGCCCT-TCA--CCGGG-CATGTGCACG--CCTCTTTCAC-A
ATCCACACA-CAC----CTGTGCACCTTTGCGTGGG-TCCCGGGAA--------------AGCTTCTGTC----AGTACC
GGGCTCGCG--TCCTTTTC---ACAAACTC--TATGTATGTCTT---AAGAATGTCTA--CTCGATGTAAT-AAAA-CGC
ATCTAA-TACAACTTTCAACAACGGATCTCTTGGCTCTCGCATCGATGAAGAACGCAGCGAAATGCGATAAGTAATGTGA
ATTGCAGAATTCAGTGAATCATCGAATCTTTGAACGCACCTTGCGCCCTTTGGTATTCCGAAGGGCACACCTGTTTGAGT
GTCGTGAAATTCTCAACCCT-CCTCACTTT---TGTGACGGCTG-------GGCTTGGACTTGGAGGCTTT--GCCGGAC
CG---------TTCGCGT-TCGGCTCCTCTCAAATGCATTAGTA-CGTCTT--GTTGCG---ATGTAC-CCTCGGTGTGA
TAATTATCTACGCTG---TGGTGTGCT-TGCTTCT-GGTGAG-AC-GGGCTT-CAAACCG-----TCCGAAAG-GACA--
-CTTCATCGAAACTTGACCTCAAAT-CAGGTGGCCCCTAGTAACTGCGAGTGAAGCGGGAAAAGCTCAAATTTAAAATCT
GGCGGTCTCC-GGCCGTCCGAGTTGTAGTCTGGAGAAGCGTTTTCCGCGTTGGACCGTGTACAAGTTTCCTGGAACGGAG
CGTCATAGAGGGTGAGAATCCCGTCTTTGACACGGACCCC-AATGCTTTGTGATGCGCTCTCAAAGAGTCGAGTTGTTTG
GGAATGCAGCTCAAAATGGGTGGTGAATTCCATCTAAAGCTAAATATTGGCGAGAGACCGATAGCGAACAAGTACCGTGA
GGGAAAGATGAAAAGCACTTTGGAAAGAGAGTTAAACAGTACGTGAAATTGTTGAAAGGGAAACGCTTGAAGTCAGTCGC
GTCGGCCGGGACTCAGCCTTGC--ATTCGCTTGGTGTACTTTCCGGTCGACGGGCCAGCATCAGTTTTGACCGCGAGACA
AA-GGCGGAGGGAATGTGGCTCTT----TCGGGAGTGTTATAGCCATTGGTCGCATGTCGCGGTCGGGACTGAGGACCGC
AAGCACGCCTTTAT---GG-CCGGGG-TTCGCCCACGTA--CGTGCTTAGGATGCT-GGCGTAATGGCTTTAAACGACCC
GTCTTGAAACACGGACCAAGGAGTCTAACATGCCTGCGAGTGTTCGGGTGGAAAACCCGTGCGCGCAATGAAAGTGAAAG
TTGGGATCCCTGTCGTGGGGTGCACCGACGCCCGGACCAGACCTTTTGTGACGGATCTGCGGTAGAGCATGTATGTTGGG
ACCCGAAAGATGGTGAACTATGCCTGAATAGGGTGAAGCCAGAGGAAACTCTGGTGGAGGCTCGTAGCGATTCTGACGTG
CAAATCGATCGTCAAATTTGGGTATAGGGGCGAAAGACTAATCGA
>50_A_botryosus_He2712                 
GATTAATGAAACAACA-ACGCGATCGAG-GTTGTAGCTGGCCCCCTAA--CGAGGGCATGTGCACG--CCTCTTTCGC-A
ATCCAAACA-CAC----CTGTGCACCTTCGCGTGGG---TCGG-------------CGGCGACGTC--------------
-GGCTCGCGA-TTCTCTCC---ACACACCCCTTTTGTATGTTAAC--AAGAATGTCAT-CTACGATGTTATTAAAAACGC
ATCTAA-TACAACTTTCAACAACGGATCTCTTGGCTCTCGCATCGATGAAGAACGCAGCGAAATGCGATAAGTAATGTGA
ATTGCAGAATTCAGTGAATCATCGAATCTTTGAACGCACCTTGCGCCCTTTGGTATTCCGAAGGGCACACCTGTTTGAGT
GTCGTGAAATTCTCAACCCT-CCTCACTTTGT-TGTGTTGGAAG-------GGATTGGACTTGGAGGTCTTT-GCCGG--
-----------------CTTCGGCTCCTCTCAAATGCATTAGTG-CGTCCC--GTTGCGGAAACGTGC-CTTCGGTGTGA
TAATTATCTACGCCGTGTCAGCGCACTCTGCTTCT-CGTGGGAAG-GCGCTT-CGAACTG-----TCCGAGAA-GGACGA
-ATTCATCGAACCTTGACCTCAAAT-CAGGTGGCCCCTAGTAACTGCGAGTGAAGCGGGAAAAGCTCAAATTTAAAATCT
GGCGGTCTCC-GGCCGTCCGAGTTGTAGTCTGGAGAAGCGTTTTCCGCGTTGGACCGTGTACAAGTTTCCTGGAACGGAG
CGTCATAGAGGGTGAGAATCCCGTCTTTGACACGGACCCC-AATGCTTTGTGATGCGCTCTCAAAGAGTCGAGTTGTTTG
GGAATGCAGCTCAAAATGGGTGGTGAATTCCATCTAAAGCTAAATATTGGCGAGAGACCGATAGCGAACAAGTACCGTGA
GGGAAAGATGAAAAGCACTTTGGAAAGAGAGTTAAACAGTACGTGAAATTGTTGAAAGGGAAACGCTTGAAGTCAGTCGC
GTCTGCCGGGACTCAGCCTTGC--TTCCGCTAGGTGTACTTTCCGGTAGACGGGCCAGCATCAGTTTTGGCCGCGAGAAA
AA-GGCGGAGGGAATGTGGCTCTT----TCGGGAGTGTTATAGCCCTCTGTCACATGTCGCGGCTGGGACTGAGGACCGC
A-GCACGCCTTTAT---GG-CCGGGG-TTCGCCCACGTA--CGTGCTTAGGATGCT-GGCGTAATGGCTTTAAACGACCC
GTCTTGAAACACGGACCAAGGAGTCTAACATGCCTGCGAGTGTTCGGGTGGAAAACCCGTGCGCGTAATGAAAGTGAAAG
TTGGGATCCCTGTCGTGGGGTGCACCGACGCCCGGACCAGACCTTTTGTGACGGATCTGCGGTAGAGCATGTATGTTGGG
ACCCGAAAGATGGTGAACTATGCCTGAATAGGGTGAAGCCAGAGGAAACTCTGGTGGAGGCTCGTAGCGATTCTGACGTG
CAAATCGATCGTCAAATTTGGGTATAGGGGCGAAAGACTAATCGA
>55_S_ostrea_He2067                    
CATTAATGAAAT------TATGACTGGG-GTTGTAGCTGGCCTA-TAA--AA-CGGCATGTGCACG--CTCCTTTCAC-A
ATCCACACA-CAC----CTGTGCACCTTCGCGGGGG-TCTTT------------------TTTTCTCTTCGGGGGAATAA
AGGCTCGCG--TCCCTTT----ACACACCC--TTTGTATGTCTT---AAGAATGTCTA--CTCGATGTAAT-AAAA-CGC
ATCTAA-TACAACTTTCAACAACGGATCTCTTGGCTCTCGCATCGATGAAGAACGCAGCGAAATGCGATAAGTAATGTGA
ATTGCAGAATTCAGTGAATCATCGAATCTTTGAACGCACCTTGCGCCCTTTGGTATTCCGAAGGGCACACCTGTTTGAGT
GTCGTGAAATTCTCAACCCT-CCTCGCTTT---TTCGGCGAGCGTAG----GGATTGGACTTGGAGGCTTT--GCCGGGC
TC---------TCATCGC-TCGGCTCCTCTCAAATGCATTAGTG-CGTCTT--GTTGCG---ACGTGCGCCTCGGTGTGA
TAATTATCTACGCTG---TGGTGCGCT-TGCTTCT-TGTGGAGAC-ACGCTTTCGAACCG-----TCCGAAAG-GACAGC
-TTTCATCGAACTTTGACCTCAAAT-CAGGTGGCCCCTAGTAACTGCGAGTGAAGCGGGAAAAGCTCAAATTTAAAATCT
GGCGGTCTTCTGGCCGTCCGAGTTGTAGTCTGGAGAAGCGTTTTCCGCGTTGGACCGTGTACAAGTTTCCTGGAACGGAG
CGTCATAGAGGGTGAGAATCCCGTCTTTGACACGGACCCC-AATGCTTTGTGATGCGCTCTCAAAGAGTCGAGTTGTTTG
GGAATGCAGCTCAAAATGGGTGGTGAATTCCATCTAAAGCTAAATATTGGCGAGAGACCGATAGCGAACAAGTACCGTGA
GGGAAAGATGAAAAGCACTTTGGAAAGAGAGTTAAACAGTACGTGAAATTGTTGAAAGGGAAACGCTTGAAGTCAGTCGC
GTCGTCCGGGACTCAGCCTTGC--ATCCGCTTGGTGTACTTTCCGGTCGACGGGCCAGCATCAGTTTTGACCGCGAGATA
AA-GGCGGAGGGAATGTGGCTCCCCGTTTGGGGAGTGTTATAGCCCTTCGTCAGATGTCGCGGTTGGGACTGAGGAACTC
A-GCACGCCTCTAT---GG-CCGGGG-TTCGCCCACGTA--CGTGCTTAGGATGCT-GGCGTAATGGCTTTAAACGACCC
GTCTTGAAACACGGACCAAGGAGTCTAACATGCCTGCGAGTGTTCGGGTGGAAAACCCGTGCGCGCAATGAAAGTGAAAG
TTGGGATCCCTGTCGTGGGGTGCACCGACGCCCGGCCCAGACCTTTTGTGACGGAGCTGCGGTAGAGCATGTATGTTGGG
ACCCGAAAGATGGTGAACTATGCCTGAATAGGGTGAAGCCAGAGGAAACTCTGGTGGAGGCTCGTAGCGATTCTGACGTG
CAAATCGATCGTCAAATTTGGGTATAGGGGCGAAAGACTAATCGA
>57_S_complicatum_He2234               
CATTAATGAATT------TATGACTGGA-GTTGTAGCTGGCCCT-TAA--AAACGGCATGTGCACG--CTCCTTTCACTA
ATCCACACA-CAC----CTGTGCACCTTCGCGGGGG-TCTT-----------------------CTTTTCGGAG-----A
AGGCTCGCG--TCCCTTT----ACACACCC--TTTGTATGTCTT---AAGAATGTCTA--CTCGATGTAAT-AAAA-CGC
ATCTAA-TACAACTTTCAACAACGGATCTCTTGGCTCTCGCATCGATGAAGAACGCAGCGAAATGCGATAAGTAATGTGA
ATTGCAGAATTCAGTGAATCATCGAATCTTTGAACGCACCTTGCGCCCTTTGGTATTCCGAAGGGCACACCTGTTTGAGT
GTCGTGAAATTCTCAACCCT-CTTCATTTT---TTTA-TGAATGAAGCAGTGGCTTGGACTTGGAGGTTTTTTGCCGGGC
-C---------TCACCGC-TCGGCTCCTCTCAAATGCATTAGTG-CGTCTT--GTTGCG---ACGTGCGCCTCGGTGTGA
TAATTATCTACGCTG---TGGTGCGCT-TGCTTCT--GTGGAGAC-GCGCTTTCTAACCG-----TCCGAAAG-GACAGC
-TTTCATCGAACTTTGACCTCAAAT-CAGGTGGCCCCTAGTAACTGCGAGTGAAGCGGGAAAAGCTCAAATTTAAAATCT
GGCGGTCTTCTGGCCGTCCGAGTTGTAGTCTGGAGAAGCGTTTTCCGCGTTGGACCGTGTACAAGTTTCCTGGAACGGAG
CGTCATAGAGGGTGAGAATCCCGTCTTTGACACGGATCCC-AATGCTTTGTGATGCGCTCTCAAAGAGTCGAGTTGTTTG
GGAATGCAGCTCAAAATGGGTGGTGAATTCCATCTAAAGCTAAATATTGGCGAGAGACCGATAGCGAACAAGTACCGTGA
GGGAAAGATGAAAAGCACTTTGGAAAGAGAGTTAAACAGTACGTGAAATTGTTGAAAGGGAAACGCTTGAAGTCAGTCGC
GTCGGCCGGGACTCAGCCTTGC--ATCCGCTTGGTGTACTTTCCGGTCGACGGGCCAGCATCAGTTTTGACCGCGAGATA
AA-GGCGGAGGGAATGTGGCTCTC----TCGGGAGTGTTATAGCCCTTCGTCAGATGTCGCGGTTGGGACTGAGGAACTC
A-GCACGCCTTTAT---GG-CCGGGG-TTCGCCCACGTA--CGTGCTTAGGATGCT-GGCGTAATGGCTTTAAACGACCC
GTCTTGAAACACGGACCAAGGAGTCTAACATGCCTGCGAGTGTTCGGGTGGAAAACCCGTGCGCGCAATGAAAGTGAAAG
TTGGGATCCCTGTCGTGGGGTGCACCGACGCCCGGCCCAGACCTTTTGTGACGGAGCTGCGGTAGAGCATGTATGTTGGG
ACCCGAAAGATGGTGAACTATGCCTGAATAGGGTGAAGCCAGAGGAAACTCTGGTGGAGGCTCGTAGCGATTCTGACGTG
CAAATCGATCGTCAAATTTGGGTATAGGGGCGAAAGACTAATCGA
>63_A_oakesii_HHB1189_A                
CATTAATGAAGCTTCT-ACCCCATCGCGGGCGGGGTCTGTTCTG---G--CTTTG-CAAGTGAACG-CCTCCGTCTGTGA
A-TCATCCA-CACACACCTGTGCACCTCCGCGTGGG---TTGGGCGGCGT----------AACACCCGTCT---------
-GGCCTGCG---TCTTTTC---ACAAACTC---TTGTATGTCTT---CAGAATGTAAT--CTCGATGTCAT-AAAA-CGC
ATCTAA-TACAACTTTCAACAACGGATCTCTTGGCTCTCGCATCGATGAAGAACGCAGCGAAATGCGATAAGTAATGTGA
ATTGCAGAATTCAGTGAATCATCGAATCTTTGAACGCACCTTGCGCCCTTTGGTATTCCGAAGGGCACACCTGTTTGAGT
GTCGTGAAATTCTCAACTCTCCCTCCTTTTGT-TAGGAGGGATG-------AGATTGGACTTGGAGGTTCTT-GCTGGCC
-----------ATTGCGG-TCAGCTCCTCTCAAATGCATTAGTG-CGTCTT--GTTGCA---ACGTAC-CCTCGGTGTGA
TAAATATCTACGCTGTG--GTCCTACGATGCTGCC-TGTGGG--ATGCGCTT-ATAACCG-----TCCTCTGG-ACAA--
--TTCATCGAAACTTGACCTCAAAT-CAGGTGGCCCCTAGTAACTGCGAGTGAAGCGGGAAAAGCTCAAATTTAAAATCT
GGCGGTCTCT-GGCCGTCCGAGTTGTAGTCTGGAGAAGCGTTTTCCGCGTTGGACCGTGTACAAGTCACCTGGAACGGTG
CGTCATAGAGGGTGAGAATCCCGTCTTTGACACGGAGCCC-AATGCTTTGTGATGCGCTCTCAAAGAGTCGAGTTGTTTG
GGAATGCAGCTCAAAATGGGTGGTGAATTCCATCTAAAGCTAAATATTGGCGAGAGACCGATAGCGAACAAGTACCGTGA
GGGAAAGATGAAAAGCACTTTGGAAAGAGAGTTAAACAGTACGTGAAATTGTTGAAAGGGAAACGCTTGAAGTCAGTCGC
GTCGGCCGGGACTCAGCCTTGC--ATTCGCTTGGTGTACTTTCCGGTCGACGGGCCAGCATCAATTTTGACCGCGGGATA
AA-GGCGAGGGAAATGTGGCTCTT-----C-GGAGTGTTATAGTCCTTCGTCGCATGTCGCGGTTGGGATTGAGGAACTC
A-GCACGCCTTTAT---GG-CCGGGG-TTCGCCCACGTA--CGTGCTTAGGATGCT-GGCGTAATGGCTTTAAACGACCC
GTCTTGAAACACGGACCAAGGAGTCTAACATGCCTGCGAGTGTTCGGGTGGAAAACCCGTGCGCGTAATGAAAGTGAAAG
TTGGGATCCCTGTCGTGGGGTGCACCGACGCCCGGACCAGAACTTCTGTGACGGATCTGAGGTAGAGCATGTATGTTGGG
ACCCGAAAGATGGTGAACTATGCCTGAATAGGGTGAAGCCAGAGGAAACTCTGGTGGAGGCTCGTAGCGATTCTGACGTG
CAAATCGATCGTCAAATTTGGGTATAGGGGCGAAAGACTAATCGA
>64_A_oakesii_He2243                   
CATTAATGAAGCTTCT-ACCCCATCGCGGGCGGGGTCTGTTCTG---G--CTTTG-CAAGTGAACG-CCTCCGTCTGTGA
A-TCATCCA-CACACACCTGTGCACCTCCGCGTGGG---TTGGGCGGCGT----------AACACCCGTCT---------
-GGCCTGCG---TCTTTTC---ACAAACTC---TTGTATGTCTT---CAGAATGTAAT--CTCGATGCCAT-AAAA-CGC
ATCTAA-TACAACTTTCAACAACGGATCTCTTGGCTCTCGCATCGATGAAGAACGCAGCGAAATGCGATAAGTAATGTGA
ATTGCAGAATTCAGTGAATCATCGAATCTTTGAACGCACCTTGCGCCCTTTGGTATTCCGAAGGGCACACCTGTTTGAGT
GTCGTGAAATTCTCAACTCTCCCTCCTTTTGT-TAGGAGGGATG-------AGATTGGACTTGGAGGTTCTT-GCTGGCC
-----------ATTGCGG-TCAGCTCCTCTCAAATGCATTAGTG-CGTCTT--GTTGCA---ACGTAC-CCTCGGTGTGA
TAAATATCTACGCTGTG--GTCCTACGATGCTGCC-TGTGGG--ATGCGCTT-ATAACCG-----TCCTCTGG-ACAA--
--TTCATCGAAACTTGACCTCAAAT-CAGGTGGCCCCTAGTAACTGCGAGTGAAGCGGGAAAAGCTCAAATTTAAAATCT
GGCGGTCTCT-GGCCGTCCGAGTTGTAGTCTGGAGAAGCGTTTTCCGCGTTGGACCGTGTACAAGTCACCTGGAACGGTG
CGTCATAGAGGGTGAGAATCCCGTCTTTGACACGGAGCCC-AATGCTTTGTGATGCGCTCTCAAAGAGTCGAGTTGTTTG
GGAATGCAGCTCAAAATGGGTGGTGAATTCCATCTAAAGCTAAATATTGGCGAGAGACCGATAGCGAACAAGTACCGTGA
GGGAAAGATGAAAAGCACTTTGGAAAGAGAGTTAAACAGTACGTGAAATTGTTGAAAGGGAAACGCTTGAAGTCAGTCGC
GTCGGCCGGGACTCAGCCTTGC--ATTCGCTTGGTGTACTTTCCGGTCGACGGGCCAGCATCAATTTTGACCGCGGGATA
AA-GGCGAGGGAAATGTGGCTCTT-----C-GGAGTGTTATAGTCCTTCGTCGCATGTCGCGGTTGGGATTGAGGAACTC
A-GCACGCCTTTAT---GG-CCGGGG-TTCGCCCACGTA--CGTGCTTAGGATGCT-GGCGTAATGGCTTTAAACGACCC
GTCTTGAAACACGGACCAAGGAGTCTAACATGCCTGCGAGTGTTCGGGTGGAAAACCCGTGCGCGTAATGAAAGTGAAAG
TTGGGATCCCTGTCGTGGGGTGCACCGACGCCCGGACCAGAACTTCTGTGACGGATCTGAGGTAGAGCATGTATGTTGGG
ACCCGAAAGATGGTGAACTATGCCTGAATAGGGTGAAGCCAGAGGAAACTCTGGTGGAGGCTCGTAGCGATTCTGACGTG
CAAATCGATCGTCAAATTTGGGTATAGGGGCGAAAGACTAATCGA
>66_A_grantii_HHB14417                 
CATTAATGAAATTTC-----GTGGGGAGTGCTGTAGCTGGCCTTT-----CGGGG-CATGTGCACG--CCTCTTCACA-A
A----TCCA-CTCACACCTGTGCACTCTTGCGTGGG--CTT-AGGTCTGGTATT-CATAAAC---CTAGCCGGC------
----CCACG--TC-CTTTC---ACACACTC---TTGTATGTCAT----ATGA-ATGTC----TAGTGATGTTATAAACGC
ATCT-AATACAACTTTCAACAACGGATCTCTTGGCTCTCGCATCGATGAAGAACGCAGCGAAATGCGATAAGTAATGTGA
ATTGCAGAATTCAGTGAATCATCGAATCTTTGAACGCACCTTGCGCCCTTTGGTATTCCGAAGGGCACACCTGTTTGAGT
GTCGTGAAATCATCAACTCTTACTTTCTTTA--TTGAAAGTCTG-------AGATTGGACTTGGAGGCTTTT-GCTGGTC
C-------------TAGGATCGGCTCCTCTTAAATATATTAGTG-CGGCTC--GTTGCC--AACGTAC-CTTTGGTGTGA
TAAATATCTACGCTTC--TGGTCACGTAG--CTAC-TTGTGAGAC-GCGCT-CCTAACCG-----TCCTTCAGTTGGACA
-A-TTCATGAAACTTGACCTCAAAT-CAGGTGGCCCCTAGTAACTGCGAGTGAAGCGGGAAAAGCTCAAATTTAAAATCT
GGCAGTTTC--GGCTGTCCGAGTTGTAATCTGGAGAAGCGTTTTCCGCGTTGGACCGTGTACAAGTTTCCTGGAACGGAG
CGTCATAGAGGGTGAGAATCCCGTCTTTGACACGGACCCC-AATGCTTTGTGATACGCTCTCAAAGAGTCGAGTTGTTTG
GGAATGCAGCTCAAAATGGGTGGTGAATTCCATCTAAAGCTAAATATTGGCGAGAGACCGATAGCGAACAAGTACCGTGA
GGGAAAGATGAAAAGCACTTTGGAAAGAGAGTTAAACAGTACGTGAAATTGTTGAAAGGGAAACGCTTGAAGTCAGTCGC
GTTGGCCGGGACTCAGCCTTGC--TTCCGCTTGGTGTACTTTCCGGTCGACGGGCCAGCATCAATTTTGACCGCGGGATA
AA-GTCCAGGGGAAGGTGGCTCT-----TC-GGAGTGTTATAGCCTCTGGTCACATGCCGCGGTTGGGATTGAGGAATTC
A-GCACGCCTTTAATTAGGTTCGGGG-TTCGCCCACGTT--CGTGCTTAGGATGCT-GGCGTAATGGCTTTAAACGACCC
GTCTTGAAACACGGACCAAGGAGTCTAACATGCCTGCGAGTGTTCGGGTGGAAAACCCGTGCGCGTAATGAAAGTGAAAG
TTGGGATCCCTGTCGTGGGGTGCACCGACGCCCGGACCAGAACTTCTGTGACGGATCTGCGGTAGAGCATGTATGTTGGG
ACCCGAAAGATGGTGAACTATGCCTGAATAGGGTGAAGCCAGAGGAAACTCTGGTGGAGGCTCGTAGCGATTCTGACGTG
CAAATCGATCGTCAAATTTGGGTATAGGGGCGAAAGACTAATCGA
>67_A_grantii_HHB_14418                
CATTAATGAA-TTTC-----GTGGGGAGTGCTGTAGCTGGCCTTT-----CGGGG-CATGTGCACG--CCTCTTCACA-A
A----TCCA-CTCACACCTGTGCACTCTTGCGTGGG--CTT-AGGTCTGGTATT-CATAAAC---CTAGCCGGC------
----CCACG--TC-CTTTC---ACACACTC---TTGTATGTCAT----ATGA-ATGTC----TAGTGATGTTATAAACGC
ATCT-AATACAACTTTCAACAACGGATCTCTTGGCTCTCGCATCGATGAAGAACGCAGCGAAATGCGATAAGTAATGTGA
ATTGCAGAATTCAGTGAATCATCGAATCTTTGAACGCACCTTGCGCCCTTTGGTATTCCGAAGGGCACACCTGTTTGAGT
GTCGTGAAATCATCAACTCTTACTTTCTTTA--TTGAAAGTCTG-------AGATTGGACTTGGAGGCTTTT-GCTGGTC
C-------------TAGGATCGGCTCCTCTTAAATATATTAGTG-CGGCTC--GTTGCC--AACGTAC-CTTTGGTGTGA
TAAATATCTACGCTTC--TGGTCACGTAG--CTAC-TTGTGAGAC-GTGCT-CCTAACCG-----TCCTTCAGTTGGACA
-A-TTCATGAAACTTGACCTCAAAT-CAGGTGGCCCCTAGTAACTGCGAGTGAAGCGGGAAAAGCTCAAATTTAAAATCT
GGCAGTTTC--GGCTGTCCGAGTTGTAATCTGGAGAAGCGTTTTCCGCGTTGGACCGTGTACAAGTTTCCTGGAACGGAG
CGTCATAGAGGGTGAGAATCCCGTCTTTGACACGGACCCC-AATGCTTTGTGATACGCTCTCAAAGAGTCGAGTTGTTTG
GGAATGCAGCTCAAAATGGGTGGTGAATTCCATCTAAAGCTAAATATTGGCGAGAGACCGATAGCGAACAAGTACCGTGA
GGGAAAGATGAAAAGCACTTTGGAAAGAGAGTTAAACAGTACGTGAAATTGTTGAAAGGGAAACGCTTGAAGTCAGTCGC
GTTGGCCGGGACTCAGCCTTGC--TTCCGCTTGGTGTACTTTCCGGTCGACGGGCCAGCATCAATTTTGACCGCGGGATA
AA-GTCCAGGGGAAGGTGGCTCT-----TC-GGAGTGTTATAGCCTCTGGTCACATGCCGCGGTTGGGATTGAGGAATTC
A-GCACGCCTTTAATTAGGTTCGGGG-TTCGCCCACGTT--CGTGCTTAGGATGCT-GGCGTAATGGCTTTAAACGACCC
GTCTTGAAACACGGACCAAGGAGTCTAACATGCCTGCGAGTGTTCGGGTGGAAAACCCGTGCGCGTAATGAAAGTGAAAG
TTGGGATCCCTGTCGTGGGGTGCACCGACGCCCGGACCAGAACTTCTGTGACGGATCTGCGGTAGAGCATGTATGTTGGG
ACCCGAAAGATGGTGAACTATGCCTGAATAGGGTGAAGCCAGAGGAAACTCTGGTGGAGGCTCGTAGCGATTCTGACGTG
CAAATCGATCGTCAAATTTGGGTATAGGGGCGAAAGACTAATCGA
>65_A_amorphus_KHL4240                 
--------------------------------------------------------------------------------
--------------------------------------------------------------------------------
--------------------------------------------------------------------------------
------------------------------------------------------------------GATAAGTAATGTGA
ATTGCAGAATTCAGTGAATCATCGAATCTTTGAACGCACCTTGCGCCCTTTGGTATTCCGAAGG-CACACCTGTTTGAGT
GTCGTGAAATCATCAACTCTTACTTTCTTGA--TTGAAAGTCTG-------AGATTGGACTTGGAGGCTTTT-GCTGGTC
CC------------TAGGATCGGCTCCTCTCAAATGCATCAGTG-CGGCTC--GTTGCC--AACGTAC-CTTTGGTGTGA
TAAATATCTACGCTTC--TGGTCACGTGG--CTAC-TTGTGAGAC-GTGCT-CCTAACCG-----TCCTTCAGTTGGACA
-C-TTCATGAAACTTGACCTCAAAT-CAGGTGGCCCCTAGTAACTGCGAGTGAAGCGGGAAAAGCTCAAATTTAAAATCT
GGCAGTTTC--GGCTGTCCGAGTTGTAATCTGGAGAAGCGTTTTCCGCGTTGGACCGTGTACAAGTTTCCTGGAACGGAG
CGTCATAGAGGGTGAGAATCCCGTCTTTGACACGGACCCC-AATGCTTTGTGATACGCTCTCAAAGAGTCGAGTTGTTTG
GGAATGCAGCTCAAAATGGGTGGTGAATTCCATCTAAAGCTAAATATTGGCGAGAGACCGATAGCGAACAAGTACCGTGA
GGGAAAGATGAAAAGCACTTTGGAAAGAGAGTTAAACAGTACGTGAAATTGTTGAAAGGGAAACGCTTGAAGTCAGTCGC
GTTGGCCGGGACTCAGCCTTGC--TTCCGCTTGGTGTACTTTCCGGTTGACGGGCCAGCATCAATTTTGACCGCGGGATA
AA-GTCCGGAGGAAGGTGGCTCT-----TCCGGAGTGTTATAGCCTCTGGTCACATGCCGCGGTTGGGATTGAGGAATTC
A-GCACGCCTTTAATTAGGT-CGGGG-TTCGCCCACGTT--CGTGCTTAGGATGCT-GGCGTAATGGCTTTAAACGACCC
GTCTTGAAACACGGACCAAGGAGTCTAACATGCCTGCGAGTGTTCGGGTGGAAAACCCGTGCGCGTAATGAAAGTGAAAG
TTGGGATCCCTGTCGTGGGGTGCACCGACGCCCGGACCAGAACTTCTGTGACGGATCTGCGGTAGAGCATGTATGTTGGG
ACCCGAAAGATGGTGAACTATGCCTGAATAGGGTGAAGCCAGAGGAAACTCTGGTGGAGGCTCGTAGCGATTCTGACGTG
CAAATCGATCGTCAAATTTGGGTATAGGGGCGAAAGACTAATCGA
>68_A_amorphus_Ghobad_Nejhad2464       
CATTAATGAAATTTC-----GTGAGGAGTGCTGTAGCTGGCCTTT-----CGGGG-CATGTGCACG--CCTCTTCACA-A
A----TCCA-CTCACACCTGTGCACTCTTGCGTGGG--CTT-AGGTCTGGTATT-CATAAAC---CTAGCCGGC------
----CCACG--TC-CTTTC---ACACACTC---TTGTATGTCAT----ATGA-ATGTC----TAGTGATGTTATAAACGC
ATCT-AATACAACTTTCAACAACGGATCTCTTGGCTCTCGCATCGATGAAGAACGCAGCGAAATGCGATAAGTAATGTGA
ATTGCAGAATTCAGTGAATCATCGAATCTTTGAACGCACCTTGCGCCCTTTGGTATTCCGAAGGGCACACCTGTTTGAGT
GTCGTGAAATCATCAACTCTTACTTTCTTGA--TTGAAAGTCTG-------AGATTGGACTTGGAGGCTTTT-GCTGGTC
C-------------TAGGATCGGCTCCTCTTAAATGCATTAGTG-CGGCTC--GTTGCC--AACGTAC-CTTTGGTGTGA
TAAATATCTACGCTTC--TGGTCACGTAG--CTAC-TTGTGAGAC-GTGCT-CCTAACCG-----TCCTTCAGTTGGACA
-C-TTCATGAAACT-GACCTCAAAT-CCAGGGTCCCCTAGTAACTGCGAGTGAAGCGGGAAAAGCTCAAATTTAAAATCT
GGCAGTTTC--GGCTGTCCGAGTTGTAATCTGGAGAAGCGTTTTCCGCGTTGGACCGTGTACAAGTTTCCTGGAACGGAG
CGTCATAGAGGGTGAGAATCCCGTCTTTGACACGGACCCC-AATGCTTTGTGATACGCTCTCAAAGAGTCGAGTTGTTTG
GGAATGCAGCTCAAAATGGGTGGTGAATTCCATCTAAAGCTAAATATTGGCGAGAGACCGATAGCGAACAAGTACCGTGA
GGGAAAGATGAAAAGCACTTTGGAAAGAGAGTTAAACAGTACGTGAAATTGTTGAAAGGGAAACGCTTGAAGTCAGTCGC
GTTGGCCGGGACTCAGCCTTGC--TTCCGCTTGGTGTACTTTCCGGTTGACGGGCCAGCATCAATTTTGACCGCGGGATA
AA-GTCCAGAGGAAGGTGGCTCT-----TC-GGAGTGTTATAGCCTCTGGTCACATGCCGCGGTCGGGATTGAGGAATTC
A-GCACGCCTTTAATTAGGTTCGGGG-TTCGCCCACGTT--CGTGCTTAGGATGCT-GGCGTAATGGCTTTAAACGACCC
GTCTTGAAACACGGACCAAGGAGTCTAACATGCCTGCGAGTGTTCGGGTGGAAAACCCGTGCGCGTAATGAAAGTGAAAG
TTGGGATCCCTGTCGTGGGGTGCACCGACGCCCGGACCAGAACTTCTGTGACGGATCTGCGGTAGAGCATGTATGTTGGG
ACCCGAAAGATGGTGAACTATGCCTGAATAGGGTGAAGCCAGAGGAAACTCTGGTGGAGGCTCGTAGCGATTCTGACGTG
CAAATCGATCGTCAAATTTGGGTATAGGGGCGAAAGACTAATCGA
>108_A_pinicola_Wu1106_16              
--TTAATGAAATCT-----AGTGGGGAGCGCTGTAGCTGGCCTTT-----CGGGG-CATGTGCACG--CCTCTTCACA-A
A----TCCA-ATCACACCTGTGCACCTTCGCGTGGG--CTTTCGGTCTGGTACCATATAAAC---CTAGCCGGC------
----CCACG--TC-TCTTC---ACACACCC--TTTGTATGTCTC----ATGA-ATGTC----TAGTGATGTTATAAACGC
ATCT-AATACAACTTTCAACAACGGATCTCTTGGCTCTCGCATCGATGAAGAACGCAGCGAAATGCGATAAGTAATGTGA
ATTGCAGAATTCAGTGAATCATCGAATCTTTGAACGCACCTTGCGCCCTTTGGTATTCCGAAGGGCACGCCTGTTTGAGT
GTCGTGAAATCATCAACTCTTTCTTTCTTTA--TTGAAGGTCTG-------AGATTGGACTTGGAGGCT-TT-GCCGGTC
C-------------TAGGATCGGCTCCTCTTAAATGTATCAGTG-CGACTC--AT---------GTGC-CTTTGGTGTGA
TAAATATCTACGCTTC--TGGTCACGTAG----------TGAGAA-GTGCT-TCTAACCG-----TCCTTCAGTTGGACA
-A-TTCATGAACTTTGACCTCAAAT-CAGGCGGCCCCTAGTAACTGCGAGTGAAGCGGGAAAAGCTCAAATTTAAAATCT
GGCGGTTTC--GGCCGTCCGAGTTGTAATCTGGAGAAGCGTTTTCCGCGTTGGACCGTGTACAAGTTTCCTGGAACGGAG
CGTCATAGAGGGTGAGAATCCCGTCTTGGACCCGGGCCCC-AATGCTTTGTGATACGCTCTCAAAGAGTCGAGTTGTTTG
GGAATGCAGCTCAAAATGGGTGGTGAATTCCATCTAAAGCTAAATATTGGCGAGAGACCGATAGCGAACAAGTACCGTGA
GGGAAAGATGAAAAGCACTTTGGAAAGAGAGTTAAACAGTACGTGAAATTGTTGAAAGGGAAACGCTTGAAGTCAGTCGC
GTTGGCCGGGACTCAGCCTTGC--ATCCGCTTGGTGTACTTTCCGGTCGACGGGCCAGCATCAATTTTGACCGCGGGATA
AA-GTCTGGAGGAAGGTGGCTCT-----TC-GGAGTGTTATAGCCTCCGGTCACATGCCGCGGTTGGGATTGAGGAATTC
A-GCACGCCTTTTATTAGGTTCGGGG-TTCGCCCACGTT--CGTGCTTAGGATGCT-GGCGTAATGGCTTTAAACGA???
????????????????????????????????????????????????????????????????????????????????
????????????????????????????????????????????????????????????????????????????????
????????????????????????????????????????????????????????????????????????????????
?????????????????????????????????????????????
>109_A_pinicola_Wu1308_54_T            
CATTAATGAAATCT-----AGTGGGGAGCGCTGTAGCTGGCCTTT-----CGGGG-CATGTGCACG--CCTCTTCACA-A
A----TCCA-ATCACACCTGTGCACCTTCGCGTGGG--CTTTCGGTCTGGTACCATATAAAC---CTAGCCGGC------
----CCACG--TC-TCTTC---ACACACCC--TTTGTATGTCTC----ATGA-ATGTC----TAGTGATGTTATAAACGC
ATCT-AATACAACTTTCAACAACGGATCTCTTGGCTCTCGCATCGATGAAGAACGCAGCGAAATGCGATAAGTAATGTGA
ATTGCAGAATTCAGTGAATCATCGAATCTTTGAACGCACCTTGCGCCCTTTGGTATTCCGAAGGGCACGCCTGTTTGAGT
GTCGTGAAATCATCAACTCTTTCTTTCTTTA--TTGAAGGTCTG-------AGATTGGACTTGGAGGCT-TT-GCCGGTC
C-------------TAGGATCGGCTCCTCTTAAATGTATCAGTG-CGACTC--AT---------GTGC-CTTTGGTGTGA
TAAATATCTACGCTTC--TGGTCACGTAG----------TGAGAA-GTGCT-TCTAACCG-----TCCTTCAGTTGGACA
-A-TTCATGAACTTTGACCTCAAAT-CAGGCGGCCCCTAGTAACTGCGAGTGAAGCGGGAAAAGCTCAAATTTAAAATCT
GGCGGTTTC--GGCCGTCCGAGTTGTAATCTGGAGAAGCGTTTTCCGCGTTGGACCGTGTACAAGTTTCCTGGAACGGAG
CGTCATAGAGGGTGAGAATCCCGTCTTTGACACGGACCCC-AATGCTTTGTGATACGCTCTCAAAGAGTCGAGTTGTTTG
GGAATGCAGCTCAAAATGGGTGGTGAATTCCATCTAAAGCTAAATATTGGCGAGAGACCGATAGCGAACAAGTACCGTGA
GGGAAAGATGAAAAGCACTTTGGAAAGAGAGTTAAACAGTACGTGAAATTGTTGAAAGGGAAACGCTTGAAGTCAGTCGC
GTTGGCCGGGACTCAGCCTTGC--ATCCGCTTGGTGTACTTTCCGGTCGACGGGCCAGCATCAATTTTGACCGCGGGATA
AA-GTCTGGAGGAAGGTGGCTCT-----TC-GGAGTGTTATAGCCTCCGGTCACATGCCGCGGTTGGGATTGAGGAATTC
A-GCACGCCTTTTATTAGGTTCGGGG-TTCGCCCACGTT--CGTGCTTAGGATGCT-GGCGTAATGGCTTTAAACGACCC
GTCTTGAAACACGGACCAAGGAGTCTAACATGCCTGCGAGTGTTCGGGTGGAAAACCCGTGCGCGTAATGAAAGTGAAAG
TTGGGATCCCTGTCGTGGGGTGCACCGACGCCCGGACCAGAACTTCTGTGACGGATCTGCGGTAGAGCATGTATGTTGGG
ACCCGAAAGATGGTGAACTATGCCTGAATAGGGTGAAGCCAGAGGAAACTCTGGTGGAGGCTCGTAGCGATTCTGACGTG
CAAATCGATCGTCAAATTTGGGTATAGGGGCGAAAGACTAATCGA
>110_A_subroseus_He4807                
CATTAATGAAAC-------AAAGGAGAGTGTTGTAGCTGGCCTTT-----CGGGG-CATGTGCACG--CCTCTTCACA-A
A----TCCA-ATCACACCTGTGCACTTCTGCGTGGG--TC---GGTCTGGCC--TAAAAAAC---CTAGCCGGC------
----TCGCG--TC-TTTTC---ACAAACCT---TTGTATGTCTT----CAGA-ATGTC----TAGTGATGTCATAAACGC
ATCT-AATACAACTTTCAACAACGGATCTCTTGGCTCTCGCATCGATGAAGAACGCAGCGAAATGCGATAAGTAATGTGA
ATTGCAGAATTCAGTGAATCATCGAATCTTTGAACGCACCTTGCGCCCTTTGGTATTCCGAAGGGCACACCTGTTTGAGT
GTCGTGAAATCATCAACTCTTACTTTCTTAA--CTGAGGGTCTG-------AGATTGGACTTGGAGGCTTTT-GCTGGTC
TT-------------AGGATCGGCTCCTCTTAAATGCATTAGTG-CGGCTC--GTTGCC--AACGTAC-CTTTGGTGTGA
TAATTATCTACGCTTC--TGGTCATGTGG--CTAC-TTGTGAGAC-GTGCT-TCAAACCG-----TCCTTCGG---GACA
-A-TTCATGAAACTTGACCTCAAAT-CAGGTGGCCCCTAGTAACTGCGAGTGAAGCGGGAAAAGCTCAAATTTAAAATCT
GGCGGTTTC--GGCCGTCCGAGTTGTAATCTGGAGAAGCGTTTTCCGCGTTGGACCGTGTACAAGTTTCCTGGAACGGAG
CGTCATAGAGGGTGAGAATCCCGTCTTTGACACGGACCCC-AATGCTTTGTGATACGCTCTCAAAGAGTCGAGTTGTTTG
GGAATGCAGCTCAAAATGGGTGGTGAATTCCATCTAAAGCTAAATATTGGCGAGAGACCGATAGCGAACAAGTACCGTGA
GGGAAAGATGAAAAGCACTTTGGAAAGAGAGTTAAACAGTACGTGAAATTGTTGAAAGGGAAACGCTTGAAGTCAGTCGC
GTCGTCCGGGACTCAGCCTTGC--ATTCGCTTGGTGTACTTTCCGGTTGACGGGCCAGCATCAATTTTGACCGCGGGATA
AA-GTCCAGAGAAAGGTGGCTCT-----TC-GGAGTGTTATAGTCTCTGGTCGCATGCCGCGGTTGGGATTGAGGAACTC
A-GCACGCCTTTAT---GG-TCGGGG-TTCGCCCACGTT--CGTGCTTAGGATGCT-GGCGTAATGGCTTTAAACGACCC
GTCTTGAAACACGGACCAAGGAGTCTAACATGCGTGCGAGTGTTCGGGTGGAAAACCCGTGCGCGTAATGAAAGTGAAAG
TTGGGATCCCTGTCGTGGGGTGCACCGACGCCCGGACCAGAACTTCTGTGACGGATCTGCGGTAGAGCATGTATGTTGGG
ACCCGAAAGATGGTGAACTATGCCTGAATAGGGTGAAGCCAGAGGAAACTCTGGTGGAGGCTCGTAGCGATTCTGACGTG
CAAATCGATCGTCAAATTTGGGTATAGGGGCGAAAGACTAATCGA
>111_A_subroseous_He4895               
CATTAATGAA-C-------AAAGGAGAGTGTTGTAGCTGGCCTTT-----CGGGG-CATGTGCACG--CCTCTTCACA-A
A----TCCA-ATCACACCTGTGCACTTTTGCGTGGG--TC---GGTCTGGCC--TAAAAAAC---CTAGCCGGC------
----TCGCG--TC-TTTTC---ACAAACCT---TTGTATGTCTT----CAGA-ATGTC----TAGTGATGTCATAAACGC
ATCT-AATACAACTTTCAACAACGGATCTCTTGGCTCTCGCATCGATGAAGAACGCAGCGAAATGCGATAAGTAATGTGA
ATTGCAGAATTCAGTGAATCATCGAATCTTTGAACGCACCTTGCGCCCTTTGGTATTCCGAAGGGCACACCTGTTTGAGT
GTCGTGAAATCATCAACTCTTACTTTCTTAA--CTGAGGGTCTG-------AGATTGGACTTGGAGGCTTTT-GCTGGTC
TT-------------AGGATCGGCTCCTCTTAAATGCATTAGTG-CGGCTC--GTTGCC--AACGTAC-CTTTGGTGTGA
TAATTATCTACGCTTC--TGGTCATGTGG--CTAC-TTGTGAGAC-GTGCT-TCAAACCG-----TCCTTCGG---GACA
-A-TTCATGAAACTTGACCTCAAAT-CAGGTGGCCCCTAGTAACTGCGAGTGAAGCGGGAAAAGCTCAAATTTAAAATCT
GGCGGTTTC--GGCCGTCCGAGTTGTAATCTGGAGAAGCGTTTTCCGCGTTGGACCGTGTACAAGTTTCCTGGAACGGAG
CGTCATAGAGGGTGAGAATCCCGTCTTTGACACGGACCCC-AATGCTTTGTGATACGCTCTCAAAGAGTCGAGTTGTTTG
GGAATGCAGCTCAAAATGGGTGGTGAATTCCATCTAAAGCTAAATATTGGCGAGAGACCGATAGCGAACAAGTACCGTGA
GGGAAAGATGAAAAGCACTTTGGAAAGAGAGTTAAACAGTACGTGAAATTGTTGAAAGGGAAACGCTTGAAGTCAGTCGC
GTCGTCCGGGACTCAGCCTTGC--ATTCGCTTGGTGTACTTTCCGGTTGACGGGCCAGCATCAATTTTGACCGCGGGATA
AA-GTCCAGAGAAAGGTGGCTCT-----TC-GGAGTGTTATAGTCTCTGGTCGCATGCCGCGGTTGGGATTGAGGAACTC
A-GCACGCCTTTAT---GG-TCGGGG-TTCGCCCACGTT--CGTGCTTAGGATGCT-GGCGTAATGGCTTTAAACGACCC
GTCTTGAAACACGGACCAAGGAGTCTAACATGCCTGCGAGTGTTCGGGTGGAAAACCCGTGCGCGTAATGAAAGTGAAAG
TTGGGATCCCTGTCGTGGGGTGCACCGACGCCCGGACCAGAACTTCTGTGACGGATCTGCGGTAGAGCATGTATGTTGGG
ACCCGAAAGATGGTGAACTATGCCTGAATAGGGTGAAGCCAGAGGAAACTCTGGTGGAGGCTCGTAGCGATTCTGACGTG
CAAATCGATCGTCAAATTTGGGTATAGGGGCGAAAGACTAATCGA
>71_A_wakefieldiae_He2726              
CATTAATGAA-C-------AAAGAAGAGTGTTGTAGCTGGCCTTT-----CGGGG-CATGTGCACG--CCTCTTCAAA-A
A----TCCA-ACCACACCTGTGCACTCCTGCGTGGG--TT---GGTCAGGGGGATAAAAACCT--CTGGCTAGC------
----TTGCG--TTCTTTTT---ACAAACCT---TTGTATGTCTT----CAGA-ATGTC----TAGTGATGTTATAAACGC
ATCT-AATACAACTTTCAACAACGGATCTCTTGGCTCTCGCATCGATGAAGAACGCAGCGAAATGCGATAAGTAATGTGA
ATTGCAGAATTCAGTGAATCATCGAATCTTTGAACGCACCTTGCGCCCTTTGGTATTCCGAAGGGCACACCTGTTTGAGT
GTCGTGAAATCATCAACTCCTACTTTCTTAA--TTGAAGGTCCG-------AGATTGGACTTGGAGGCTTTT-GCTGGTC
TT-----------TGAAGATCGGCTCCTCTTAAATGTATTAGTG-CGGCTC--TTCGCC--GACGTGC-CTTTGGTGTGA
TAATTATCTACGCTTC--TGGTCACGTAGGCCTAC-CT-TGAGAC-GCGCT-TCAAACCG-----TCCTTCGG---GACA
-AATCCATGAAATTTGACCTCAAAT-CAGGTGGCCCCTAGTAACTGCGAGTGAAGCGGGAAAAGCTCAAATTTAAAATCT
GGCAGTTTC--GGCTGTCCGAGTTGTAATCTGGAGAAGCGTTTTCCGCGTTGGACCGTGTACAAGTTTCCTGGAACGGAG
CGTCATAGAGGGTGAGAATCCCGTCTTTGACACGGACCCC-AATGCTTTGTGATACGCTCTCAAAGAGTCGAGTTGTTTG
GGAATGCAGCTCAAAATGGGTGGTGAATTCCATCTAAAGCTAAATATTGGCGAGAGACCGATAGCGAACAAGTACCGTGA
GGGAAAGATGAAAAGCACTTTGGAAAGAGAGTTAAACAGTACGTGAAATTGTTGAAAGGGAAACGCTTGAAGTCAGTCGC
GTCGGCCGGGACTCAGCCAAAC--AATTGCTTGGTGTACTTTCCGGTTGACGGGCCAGCATCAATTTTGATCTCGGGATA
AA-GTTCAGAGAAAGGTGGCTCT-----TC-GGAGTGTTATAGTCTCTGGTCGCATGCCGAGGTTGGGATTGAGGAACTC
A-GCACGCCTTTAT---GG-TCGGGG-TTCGCCCACGTT--CGTGCTTAGGATGCT-GGCGTAATGGCTTTAAACGACCC
GTCTTGAAACACGGACCAAGGAGTCTAACATGCCTGCGAGTGTTCGGGTGGAAAACCCGTGCGCGTAATGAAAGTGAAAG
TTGGGATCCCTGTCGTGGGGTGCACCGACGCCCGGACCAGAACTTCTGTGACGGATCTGCGGTAGAGCATGTATGTTGGG
ACCCGAAAGATGGTGAACTATGCCTGAATAGGGTGAAGCCAGAGGAAACTCTGGTGGAGGCTCGTAGCGATTCTGACGTG
CAAATCGATCGTCAAATTTGGGTATAGGGGCGAAAGACTAATCGA
>72_A_wakefieldiae_FP_135654           
CATTAATGAA-C-------AAAGAAGAGTGTTGTAGCTGGCCTTT-----CGGGG-CATGTGCACG--CCTCTTCAAA-A
A----TCCA-ACCACACCTGTGCACTCCTGCGTGGG--TT---GGTCAGGGGGATAAAAACCT--CTGGCTAGC------
----TTGCG--TTCTTTTT---ACAAACCT---TTGTATGTCTT----CAGA-ATGTC----TAGTGATGTTATAAACGC
ATCT-AATACAACTTTCAACAACGGATCTCTTGGCTCTCGCATCGATGAAGAACGCAGCGAAATGCGATAAGTAATGTGA
ATTGCAGAATTCAGTGAATCATCGAATCTTTGAACGCACCTTGCGCCCTTTGGTATTCCGAAGGGCACACCTGTTTGAGT
GTCGTGAAATCATCAACTCCTACTTTCTTAA--TTGAAGGTCCG-------AGATTGGACTTGGAGGCTTTT-GCTGGTC
TT-----------TGAAGATCGGCTCCTCTTAAATGTATTAGTG-CGGCTC--TTCGCC--GACGTGC-CTTTGGTGTGA
TAATTATCTACGCTTC--TGGTCACGTAGGCCTAC-CT-TGAGAC-GCGCT-TCAAACCG-----TCCTTCGG---GACA
-AATCCATGAAATTTGACCTCAAAT-CAGGTGGCCCCTAGTAACTGCGAGTGAAGCGGGAAAAGCTCAAATTTAAAATCT
GGCAGTTTC--GGCTGTCCGAGTTGTAATCTGGAGAAGCGTTTTCCGCGTTGGACCGTGTACAAGTTTCCTGGAACGGAG
CGTCATAGAGGGTGAGAATCCCGTCTTTGACACGGACCCC-AATGCTTTGTGATACGCTCTCAAAGAGTCGAGTTGTTTG
GGAATGCAGCTCAAAATGGGTGGTGAATTCCATCTAAAGCTAAATATTGGCGAGAGACCGATAGCGAACAAGTACCGTGA
GGGAAAGATGAAAAGCACTTTGGAAAGAGAGTTAAACAGTACGTGAAATTGTTGAAAGGGAAACGCTTGAAGTCAGTCGC
GTCGGCCGGGACTCAGCCAAAC--AATTGCTTGGTGTACTTTCCGGTTGACGGGCCAGCATCAATTTTGATCTCGGGATA
AA-GTTCAGAGAAAGGTGGCTCT-----TC-GGAGTGTTATAGTCTCTGGTCGCATGCCGAGGTTGGGATTGAGGAACTC
A-GCACGCCTTTAT---GG-TCGGGG-TTCGCCCACGTT--CGTGCTTAGGATGCT-GGCGTAATGGCTTTAAACGACCC
GTCTTGAAACACGGACCAAGGAGTCTAACATGCCTGCGAGTGTTCGGGTGGAAAACCCGTGCGCGTAATGAAAGTGAAAG
TTGGGATCCCTGTCGTGGGGTGCACCGACGCCCGGACCAGAACTTCTGTGACGGATCTGCGGTAGAGCATGTATGTTGGG
ACCCGAAAGATGGTGAACTATGCCTGAATAGGGTGAAGCCAGAGGAAACTCTGGTGGAGGCTCGTAGCGATTCTGACGTG
CAAATCGATCGTCAAATTTGGGTATAGGGGCGAAAGACTAATCGA
>73_A_wakefieldiae_He2579              
CATTAATGAA-C-------AAAGAAGAGTGTTGTAGCTGGCCTTT-----CGGGG-CATGTGCACG--CCTCTTCAAA-A
A----TCCA-ACCACACCTGTGCACTCCTGCGTGGG--TT---GGTCAGGGGGATAAAAACCT--CTGGCTAGC------
----TTGCG--TTCTTTTC---ACAAACCT---TTGTATGTCTT----CAGA-ATGTC----TAGTGATGTTATAAACGC
ATCT-AATACAACTTTCAACAACGGATCTCTTGGCTCTCGCATCGATGAAGAACGCAGCGAAATGCGATAAGTAATGTGA
ATTGCAGAATTCAGTGAATCATCGAATCTTTGAACGCACCTTGCGCCCTTTGGTATTCCGAAGGGCACACCTGTTTGAGT
GTCGTGAAATCATCAACTCCTACTTTCTTAA--TTGAAGGTCCG-------AGATTGGACTTGGAGGCTTTT-GCTGGTC
TT-----------TGAAGATCGGCTCCTCTTAAATGTATTAGTG-CGGCTC--TTCGCC--GACGTGC-CTTTGGTGTGA
TAATTATCTACGCTTC--TGGTCACGTAGGCCTAC-CT-TGAGAC-GCGCT-TCAAACCG-----TCCTTCGG---GACA
-AATCCATGAAATTTGACCTCAAAT-CAGGTGGCCCCTAGTAACTGCGAGTGAAGCGGGAAAAGCTCAAATTTAAAATCT
GGCAGTTTC--GGCTGTCCGAGTTGTAATCTGGAGAAGCGTTTTCCGCGTTGGACCGTGTACAAGTTTCCTGGAACGGAG
CGTCATAGAGGGTGAGAATCCCGTCTTTGACACGGACCCC-AATGCTTTGTGATACGCTCTCAAAGAGTCGAGTTGTTTG
GGAATGCAGCTCAAAATGGGTGGTGAATTCCATCTAAAGCTAAATATTGGCGAGAGACCGATAGCGAACAAGTACCGTGA
GGGAAAGATGAAAAGCACTTTGGAAAGAGAGTTAAACAGTACGTGAAATTGTTGAAAGGGAAACGCTTGAAGTCAGTCGC
GTCGGCCGGGACTCAGCCAAAC--AATTGCTTGGTGTACTTTCCGGTTGACGGGCCAGCATCAATTTTGATCTCGGGATA
AA-GTTCAGAGAAAGGTGGCTCT-----TC-GGAGTGTTATAGTCTCTGGTCGCATGCCGAGGTTGGGATTGAGGAACTC
A-GCACGCCTTTAT---GG-TCGGGG-TTCGCCCACGTT--CGTGCTTAGGATGCT-GGCGTAATGGCTTTAAACGACCC
GTCTTGAAACACGGACCAAGGAGTCTAACATGCCTGCGAGTGTTCGGGTGGAAAACCCGTGCGCGTAATGAAAGTGAAAG
TTGGGATCCCTGTCGTGGGGTGCACCGACGCCCGGACCAGAACTTCTGTGACGGATCTGCGGTAGAGCATGTATGTTGGG
ACCCGAAAGATGGTGAACTATGCCTGAATAGGGTGAAGCCAGAGGAAACTCTGGTGGAGGCTCGTAGCGATTCTGACGTG
CAAATCGATCGTCAAATTTGGGTATAGGGGCGAAAGACTAATCGA
>99_A_gigasporus_Wu1018-15             
CATTAATGAATTTT----TAGTGGGGAGTGCTGTAGCTGGCCTTT-----CGGGG-CATGTGCACG--CCTCTTCGCA-A
AA---TCCA-CTCCCACCTGTGCACCCTCGCGTGGG--CTTTATGTCTGGTATT--ATAAAC---CTAGCCGGC------
----CCGYS--TC--TTTC---ACACACTT---TTGTATGTCTT----AAGA-ATGTC----TAGTGATGTTA---ACGC
ATCT-AATACAACTTTCAACAACGGATCTCTTGGCTCTCGCATCGATGAAGAACGCAGCGAAATGCGATAAGTAATGTGA
ATTGCAGAATTCAGTGAATCATCGAATCTTTGAACGCACCTTGCGCCCTTTGGTATTCCGAAGGGCACACCTGTTTGAGT
GTCGTGAAATCATCAACTCTTACTTTCTTTG--TTGAAGGTCTG-------AGATTGGACTTGGAG----TT-GCTGGTC
C-------------TAGGATCGGCTCCTCTTAAATGCATTAGTG-CGGCTC--GTTGCC--AA-GTGC-CTTTGGTGTGA
TAATTATCTACGCTTC--TGGTCGGGTAT----------TGAGAC-GCGCT-TCTAACCG-----TCCCT-AGTCGGACA
-A-TTCATGAAACTTGACCTCAAAT-CAGGTGG???????????????????????????????????????????????
????????????????????????????????????????????????????????????????????????????????
????????????????????????????????????????????????????????????????????????????????
????????????????????????????????????????????????????????????????????????????????
????????????????????????????????????????????????????????????????????????????????
????????????????????????????????????????????????????????????????????????????????
????????????????????????????????????????????????????????????????????????????????
????????????????????????????????????????????????????????????????????????????????
????????????????????????????????????????????????????????????????????????????????
????????????????????????????????????????????????????????????????????????????????
????????????????????????????????????????????????????????????????????????????????
?????????????????????????????????????????????
>74_N_fuji_Wu0807_40                   
CATTAATGAAACTTC---TAGTGGAGAGTGCTGTAGCTGGCCTTT-----CGGGG-CATGTGCACG--CCTCTTCACA-A
A----TCCA-CTCACACCTGTGCACTCTTGCGTGGG--TC---GGTCTGGCG--TAAAA--C---CCCGCCGGC------
----TCACG--TCCTTTTC---ACAAACTC---TTGTATGTCTT----CAGA-ATGTC----TAGTGATGTTATAAACGC
ATCT-AATACAACTTTCAACAACGGATCTCTTGGCTCTCGCATCGATGAAGAACGCAGCGAAATGCGATAAGTAATGTGA
ATTGCAGAATTCAGTGAATCATCGAATCTTTGAACGCACCTTGCGCCCTTTGGTATTCCGAAGGGCACACCTGTTTGAGT
GTCGTGAAATCATCAACTCTTACTTTCTTAA--CTGAAGGTCTG-------AGATTGGACTTGGAGGCTTT--GCTGGTC
CT-------------ACGATCGGCTCCTCTCAAATGCATTAGTG-CGGCTC--GTTGCC--AACGTAC-CTTTGGTGTGA
TAAATATCTACGCTTC--TGGTTATGTAG--CTAC-TTGTGAGAC-GCGCT-TCAAACCG-----TCTCTCGG---GACA
-A-TTCATGAAACTTGACCTCAAAT-CAGGTGG---------ACTGCGAGTGAAGCGGGAAAAGCTCAAATTTAAAATCT
GGCAGTTTC--GGCTGTCCGAGTTGTAATCTGGAGAAGTGTTTTCCGCGTTGGACCGTGTATAAGTTTCCTGGAACGGAG
CGTCATAGAGGGTGAGAATCCCGTCTTTGACACGGACCCC-AATGCTTTGTGATACGCTCTCAAAGAGTCGAGTTGTTTG
GGAATGCAGCTCAAAATGGGTGGTGAATTCCATCTAAAGCTAAATATTGGCGAGAGACCGATAGCGAACAAGTACCGTGA
GGGAAAGATGAAAAGCACTTTGGAAAGAGAGTTAAACAGTACGTGAAATTGTTGAAAGGGAAACGCTTGAAGTCAGTCGC
GTTGGCCGGGACTCAGCCTTGC--ATTCGCTTGGTGTACTTTCCGGTCGACGGGCCAGCATCAATTTTGATCGCGGGATA
AA-GGCTAGAGAAAGGTGGCTCT-----TC-GGAGTGTTATAGTCTCTGGTCGCATGCCGCGGTTGGGATTGAGGAACTC
A-GCACGCCTTTAT---GG-TCGGGG-TTCGCCCACGTT--CGTGCTTAGGATGCT-GGCGTAATGGCTTTAAACGACCC
GTCTTGAAACACGGACCAAGGAGTCTAACATGCCTGCGAGTGTTCGGGTGGAAAACCCGTGCGCGTAATGAAAGTGAAAG
TTGGGATCTCTGTCGTGGAGTGCACCGACGCCCGGACCAGAACTTCTGTGACGGATCTGCGGTAGAGCATGTATGTTGGG
ACCCGAAAGATGGTGAACTATGCCTGAATAGGGTGAAGCCAGAGGAAACTCTGGTGGAGGCTCGTAGCGATTCTGACGTG
CAAATCGATCGTCAAATTTGGGTATA???????????????????
>75_N_fuji_Wu0807_41                   
CATTAATGAAACTTC---TAGTGGAGAGTGCTGTAGCTGGCCTTT-----CGGGG-CATGTGCACG--CCTCTTCACA-A
A----TCCA-CTCACACCTGTGCACTCTTGCGTGGG--TC---GGTCTGGCG--TAAAA--C---CCCGCCGGC------
----TCACG--TCCTTTTC---ACAAACTC---TTGTATGTCTT----CAGA-ATGTC----TAGTGATGTTATAAACGC
ATCT-AATACAACTTTCAACAACGGATCTCTTGGCTCTCGCATCGATGAAGAACGCAGCGAAATGCGATAAGTAATGTGA
ATTGCAGAATTCAGTGAATCATCGAATCTTTGAACGCACCTTGCGCCCTTTGGTATTCCGAAGGGCACACCTGTTTGAGT
GTCGTGAAATCATCAACTCTTACTTTCTTAA--CTGAAGGTCTG-------AGATTGGACTTGGAGGCTTT--GCTGGTC
CT-------------ACGATCGGCTCCTCTCAAATGCATTAGTG-CGGCTC--GTTGCC--AACGTAC-CTTTGGTGTGA
TAAATATCTACGCTTC--TGGTTATGTAG--CTAC-TTGTGAGAC-GCGCT-TCAAACCG-----TCTCTCGG---GACA
-A-TTCATGAAACTTGACCTCAAAT-CAGGTGG-CCCTAGTAACTGCGAGTGAAGCGGGAAAAGCTCAAATTTAAAATCT
GGCAGTTTC--GGCTGTCCGAGTTGTAATCTGGAGAAGTGTTTTCCGCGTTGGACCGTGTATAAGTTTCCTGGAACGGAG
CGTCATAGAGGGTGAGAATCCCGTCTTTGACACGGACCCC-AATGCTTTGTGATACGCTCTCAAAGAGTCGAGTTGTTTG
GGAATGCAGCTCAAAATGGGTGGTGAATTCCATCTAAAGCTAAATATTGGCGAGAGACCGATAGCGAACAAGTACCGTGA
GGGAAAGATGAAAAGCACTTTGGAAAGAGAGTTAAACAGTACGTGAAATTGTTGAAAGGGAAACGCTTGAAGTCAGTCGC
GTTGGCCGGGACTCAGCCTTGC--ATTCGCTTGGTGTACTTTCCGGTCGACGGGCCAGCATCAATTTTGATCGCGGGATA
AA-GGCTAGAGAAAGGTGGCTCT-----TC-GGAGTGTTATAGTCTCTGGTCGCATGCCGCGGTTGGGATTGAGGAACTC
A-GCACGCCTTTAT---GG-TCGGGG-TTCGCCCACGTT--CGTGCTTAGGATGCT-GGCGTAATGGCTTTAAACGACCC
GTCTTGAAACACGGACCAAGGAGTCTAACATGCCTGCGAGTGTTCGGGTGGAAAACCCGTGCGCGTAATGAAAGTGAAAG
TTGGGATCTCTGTCGTGGAGTGCACCGACGCCCGGACCAGAACTTCTGTGACGGATCTGCGGTAGAGCATGTATGTTGGG
ACCCGAAAGATGGTGAACTATGCCTGAATAGGGTGAAGCCAGAGGAAACTCTGGTGGAGGCTCGTAGCGATTCTGACGTG
CAAATCGATCGTCAAATTTGGGTATAGGGGCGAAAGA????????
>76_N_fuji_He2921                      
CATTAATGAA-CTTC---TAGTGGGGAGTGCTGTAGCTGGCCTTT-----CGGGG-CATGTGCACG--CCTCTTCACA-A
A----TCCA-CTCACACCTGTGCACTCTTGCGTGGG--TC---GGTCTGGTG--TAAAA--C---CCTGCCGGC------
----TCACG--TCCTTTTC---ACAAACTC---TTGTATGTCTT----CAGA-ATGTC----TAGTGATGTTATAAACGC
ATCT-AATACAACTTTCAACAACGGATCTCTTGGCTCTCGCATCGATGAAGAACGCAGCGAAATGCGATAAGTAATGTGA
ATTGCAGAATTCAGTGAATCATCGAATCTTTGAACGCACCTTGCGCCCTTTGGTATTCCGAAGGGCACACCTGTTTGAGT
GTCGTGAAATCATCAACTCTTACTTTCTTAA--CTGAAGGTCTG-------AGATTGGACTTGGAGGCTTT--GCTGGTC
CT-------------ACGATCGGCTCCTCTCAAATGTATTAGTG-CGGCTC--GTTGCC--AACGTAC-CTTTGGTGTGA
TAAATATCTACGCTTC--TGGTTATGTGG--CTAC-TTGTGAGAC-GCGCT-TCAAACCG-----TCTCTCGG---GACA
-A-TTCATGAAACTTGACCTCAAAT-CAGGTGGCCCCTAGTAACTGCGAGTGAAGCGGGAAAAGCTCAAATTTAAAATCT
GGCAGTTTC--GGCTGTCCGAGTTGTAATCTGGAGAAGTGTTTTCCGCGTTGGACCGTGTATAAGTTTCCTGGAACGGAG
CGTCATAGAGGGTGAGAATCCCGTCTTTGACACGGACCCC-AATGCTTTGTGATACGCTCTCAAAGAGTCGAGTTGTTTG
GGAATGCAGCTCAAAATGGGTGGTGAATTCCATCTAAAGCTAAATATTGGCGAGAGACCGATAGCGAACAAGTACCGTGA
GGGAAAGATGAAAAGCACTTTGGAAAGAGAGTTAAACAGTACGTGAAATTGTTGAAAGGGAAACGCTTGAAGTCAGTCGC
GTTGGCCGGGACTCAGCCTTGC--ATTCGCTTGGTGTACTTTCCGGTCGACGGGCCAGCATCAATTTCGATCGCGGGATA
AA-GGCTGGAGAAAGGTGGCTCT-----TC-GGAGTGTTATAGTCTCTGGTCGCATGCCGCGGTTGGGATTGAGGAACTC
A-GCACGCCTTTAT---GG-TCGGGG-TTCGCCCACGTT--CGTGCTTAGGATGCT-GGCGTAATGGCTTTAAACGACCC
GTCTTGAAACACGGACCAAGGAGTCTAACATGC-TGCGAGTGTTCGGGTGGAAAACCCGTGCGCGTAATGAAAGTGAAAG
TTGGGATCTCTGTCGTGGAGTGCACCGACGCCCGGACCAGAACTTCTGTGACGGATCTGCGGTAGAGCATGTATGTTGGG
ACCCGAAAGATGGTGAACTATGCCTGAATAGGGTGAAGCCAGAGGAAACTCTGGTGGAGGCTCGTAGCGATTCTGACGTG
CAAATCGATCGTCAAATTTGGGTATAGGGGCGAAAGACTAATCGA
>78_A_effusus_BJFC_He2261_T            
CATTAATGAATTTT-------AGATCGAGGTTGTAGCTGGCTTTT-----CGGAG-CATGTGCACG--TCTCTTTCAA-A
A----TCCA-ATCACACCTGTGCACCTTTGCGTAGC--TT---GGGCCGGGCTTTAAAACCCGGTCTGGTCTGCG-----
--TCTTTTT--TTTTTTTT---ACCCCCCC---TTGTATGTCTT----CAAA-ATGTC----TAGTGATGTTATAAACCC
ATCT-AATACAACTTTCAACAACGGATCTCTGGGCTCTCGCATCGATAAAAAACGCACCGAAATGCGATAAGTAATGTGA
ATTGCAAAATTCAGTGAATCATCAAATCTTTGAACGCCCCTTGCCCCCTTTGGTATTCCAAAGGGCACCCCTGTTTGAGT
GTCGGGAAATTCTCAACTCTTACTTTCTTAA--TTGAAGGCATG-------AAATTGGATTTGGAGGTATTT-GCTGGTC
TT------------TCGGATCGGCTCCTCTTAAATATATTAGTG-TGTCTC--ATTGGG--GGC-CAC-CTCCCTTGTGA
TAAATATCTACATGGC--TGGTGCTTCAC---CTT-TGAAGAGAT-GTGCT-TATGACCG-----TCTT--AACAGGACA
-A-TTTATGAA-CTTGACCTCAAATGCAGGT--CCCCTAGTAACTGCGAGTGAAGCGGGAAAAGCTCAAATTTAAAATCT
GGCAGTTTC--GGCTGTCCGAGTTGTAATCTGGAGAAGCGTTTTCCGCGTTGGACCGTGTACAAGTTTCCTGGAACGGAG
CGTCATAGAGGGTGAGAATCCCGTCTTTGACACGGACCCT-AATGCTTTGTGATACGCTCTCAAAGAGTCGAGTTGTTTG
GGAATGCAGCTCAAAATGGGTGGTGAATTCCATCTAAAGCTAAATATTGGCGAGAGACCGATAGCGAACAAGTACCGTGA
GGGAAAGATGAAAAGCACTTTGGAAAGAGAGTTAAACAGTACGTGAAATTGTTGAAAGGGAAACGCTTGAAGTCAGTCGC
GTTGGCCGGAACTCAGCCTTGC--TTTTGCTTGGTGTACTTTCTGGCTGACGGGCCAGCATCAATTTTGACTGCGGGATA
AA-GGCCAGAGAAATGTGGCTCCC----TCGGGAGTGTTATAGTCTTTGGTCACATGCCGTGGTTGGGATTGAGGAACTC
A-GCACGCCTTTAT---GG-TCGGGG-TTCGCCCACGTT--CGTGCTTAGGATGCT-GGCGTAATGGCTTTAAACGACCC
GTCTTGAAACACGGACCAAGGAGTCTAACATGCCTGCGAGTATTCGGGTGAAAAACCCGTGTGCGTAATGAAAGTGAAAG
TTGGGATCTCTGTCGTGGAGTGCACCGACGCCCGGACCAGAACTTTTGCGACGGATCTGCGGTAGAGCATGTATGTTGGG
ACCCGAAAGATGGTGAACTATGCCTGAATAGGGTGAAGCCAGAGGAAACTCTGGTGGAGGCTCGTAGCGATTCTGACGTG
CAAATCGATCGTCAAATTTGGGTATAGGGGCGAAAGACTAATCGA
>80_A_bambusicola_He2357_T             
CATTAACAAATTTC----TAG-GG-CGAGGTTGTAGCTGGCCTTC-----CGGGG-CATGTGCACG--CCTCGACCGA-A
AAAAATCCA-CACACACCCGTGCACCTTCCCGGGGG--CCG----GCC---ACTTTTGTGGGCGGTCCGC----------
---GTCTCT--CATACATA---ACAAAC-------GCAGGTCTC----AAAATGTCTC----TGGTGATGTATCATACGC
ATCTCAATACAACTTTCAACAACGGATCTCTGGGCTCTCGCATCGATAAAAAACGCACCGAAATGCGATAAGTAATGTGA
ATTGCAAAATTCATTGAATCATCAAATCTTTGAACGCACCTTGCACCCTTTGGTATTCCAAAGGGTACACCTGTTTGAGT
GTCGGGAAATCCTCAACCCTCGTTCCTTTGT------GTTCAAGT------GGCTTGAACTTGGGGGCCGTT-GCCGGCA
AT---------AC-ACTCGCCGGCTCCCCTTAAAATCATGAGTG-CAACCC--GCCGTC--TTGTTGC-CCCCGGTGTGA
TAATTATCTACGCCCC--GGACGGCTCGA-CC-TT-TGAAGGGAC-GCGCTGCCCAACCG-----TCTTCGGA---CAAA
-CCTTTACGAAACT-GACCTCAAATGCAGT---CCCCTAGTA-CTGCGAGTGAAGCGGGAAAAGCTCAAATTTAAAATCT
GGCGGTTTC--GGCCGTCCGAGTTGTAATCTGGAGAAGCGTTTTCCGCGTTGGACCGTGCACAAGTTTCCTGGAACGGAG
CGTCATAGAGGGTGAGAATCCCGTCTTTGGCACGGACCCC-AATGCTTTGTGATACGCTCTCAAAGAGTCGAGTTGTTTG
GGAATGCAGCTCAAAATGGGTGGTGAATTCCATCTAAAGCTAAATATAGGCGAGAGACCGATAGCGAACAAGTACCGTGA
GGGAAAGATGAAAAGCACTTTGGAAAGAGAGTTAAACAGTACGTGAAATTGTTGAAAGGGAAACGCTTGAAGTCAGTCGC
GTCTGCCGGGACTCAGCCTCGC--TCCGGCGTGGTGTACTTTCCGGCCGACGGGCCAACATCAATTTTGACCTCGGGATA
AG-GTCCAGGGGAAGGTGGCTCTT-----C-GGAGTGTTATAGCCCCCGGTCGCATGCCGAGGTCGGGATTGAGGAATCC
G-GCGC--------------------------------A--AGC---TGGGATGTT-GGCGTAATGGCTTTAAACGACCC
GTCTTGAAACACGGACCAAGGAGTCTAACATGCCTGCGAGTGTTCGGGTGGAAAACCCGTGCGCGCAATGAAAGTGAAAG
TTGGGAAACCTGTCGTGGGTTGCACCGACGCCCGGACCTGAACTTCTGTGACGGCTCTGCGGTAGAGCATGTATGTTGGG
ACCCGAAAGATGGTGAACTATGCCTGAATAGGGTGAAGCCAGAGGAAACTCTGGTGGAGGCTCGTAGCGATTCTGACGTG
CAAATCGATCGTCAAATTTGGGTATAGGGGCGAAAGACTAATCGA
>112_A_delicatum_CBS23386_T            
CATTAATGAATTTT----TAA-GATCGAGGTTGTCGCTGGCCTTT-----CGGGG-CATGTGCACG--CCTCTTTCGA-A
AAA--TCCAAACTACACCTGTGCACCTTTGCGTGGG--TCGA-GAAATGTCGGATCCGCAAGGACCTGACAGAGT-----
ACTGGCTCG--CGTCTTTT---ATCAACCC--TTTGTATGTCTC----AGAATGTCTT----TGATGTA--ATAAAACAC
ATCTCAATACAACTTTCAACAACGGATCTCTTGGCTCTCGCATCGATGAAGAACGCAGCGAAATGCGATAAGTAATGTGA
ATTGCAGAATTCAGTGAATCATCGAATCTTTGAACGCACCTTGCACCCTCTGGTATTCCGGAGGGTACACCTGTTTGAGT
GTCGTGAAATTCTCAACCCTTGCTCCTTTGT--TGGAGTTCAAG-------GGATTGGACTTGGGGGTCTTT-GGCGGTC
CT---------TA-GCAGATCGCCTCCCCTTAAATGCAGTTGTG-CGACTC--GTTGTT--TCGTAAC-CTTCGGTGTGA
TAATTATCTACGTCGT--CGGTCTATCGT-TACTG-TCAAGAGAC-GTGCTTTCTAACCG-----TCCCTCGG---GACA
-ACATCATGAAACTTGACCTCAAATCAGGTGG-------------------------------GCTCAAATT-AAAATCT
GGCGGTTTC--GGCCGTCCGAGTTGTAATCTGGAGAAGCGTTTTCCGCGTTGGACCGTGCACAAGTTTCCTGGAACGGAG
CGTCATAGAGGGTGAGAATCCCGTCTTTGGCACGGACCCC-AATGCTTTGTGATACGCTCTCAAAGAGTCGAGTTGTTTG
GGAATGCAGCTCAAAATGGGTGGTGAATTCCATCTAAAGCTAAATATAGGCGAGAGACCGATAGCGAACAAGTACCGTGA
GGGAAAGATGAAAAGCACTTTGGAAAGAGAGTTAAACAGTACGTGAAATTGTTGAAAGGGAAACGCTTGAAGTCAGTCGC
GTTGGCCGGGACTCAGCCTTGC--TTTTGCGTGGTGTACTTTCCGGTCGACGGGCCAACATCAATTTTGGTCTCGGGATA
AAAGTTGAGAGGAATGTGGCTCTT----TCGGGAGTGTTATAGCCTCTCTTCGCATACCGAGGCTGGGATTGAGGTATCC
A-GCGC--------------------------------T--TGCGCTTGGGATGTT-GGCGTAATGGCTTTAAACGACCC
GTCTTGAAACACGGACCAAGGAGTCTAACATGCCTGCGAGTGTTCGGGTGGAAAACCCGTGCGCGTAATGAAAGTGAAAG
TTGGGAAACCTGTCGTGGGTTGCACCGACGCCCGGACCAGAACTTCTGTGACGGATCTGCGGTAGAGCATGTATGTTGGG
ACCCGAAAGATGGTGAACTATGCCTGAATAGGGTGAAGCCAGAGGAAACTCTGGTGGAGGCTCGTAGCGATTCTGACGTG
CAAATCGATCGTCAAATTTGGGTATAGGG-CGAA???????????
>91_A_quilae_SPG3088                   
CATTAATGAATTT------AA-GATCGAGGTTGTCGCTGGCCTTT-----CGGGG-CATGTGCACG--CCTCTTTC-A-A
AAA--TCCAAACTACACCTGTGCACCTTTGCGTGGG--TCGA-GAAATGCCGTGTTCGCAAGGACTAGGCAAAGT-----
ATTGGCTCG--CGTCTTTT---ATCAACCC--TTTGTATGTCTC----AGAATGTCAT----TGATGTA--ATAAAACAC
ATCTCAATACAACTTTCAACAACGGATCTCTTGGCTCTCGCATCGATGAAGAACGCAGCGAAATGCGATAAGTAATGTGA
ATTGCAGAATTCAGTGAATCATCGAATCTTTGAACGCACCTTGCACCCTCTGGTATTCCGGAGGGTACACCTGTTTGAGT
GTCGTGAAATTCTCAGCCCTTGCTCCTTTGT--TGGAGTTCAAG-------GGATTGGACTTGGGGGTCTTT-GGCGGTC
CT---------TA-GCAGATCGCCTCCCCTTAAATGCAGTTGTG-CGACTC--GTTGTT--TCGTAAC-CTTCGGTGTGA
TAATTATCTACGTCGT--CGGTCTATCGT-TACTG-TCAAGAGAC-GCGCTTTCTAACCG-----TCCTTAGG---GACA
-ATTTTATGAAACT-GACCTCAAATGTAGAG--???????????????????????????????????????????????
????????????????????????????????????????????????????????????????????????????????
????????????????????????????????????????????????????????????????????????????????
????????????????????????????????????????????????????????????????????????????????
????????????????????????????????????????????????????????????????????????????????
????????????????????????????????????????????????????????????????????????????????
????????????????????????????????????????????????????????????????????????????????
????????????????????????????????????????????????????????????????????????????????
????????????????????????????????????????????????????????????????????????????????
????????????????????????????????????????????????????????????????????????????????
????????????????????????????????????????????????????????????????????????????????
?????????????????????????????????????????????
>102_A_weirii_HHB13499                 
CACTGCAGGTGCTG----GAGCGTTCTAAGTATTAGGAGGAGATT-----CGGGG-CATGTGCACG--CCTCGTTCGA-A
AAATCCACAACACACACCTGTGCACCTTAGCGTGGG--TCG-------GTC----TTAGTGCCGGCTTGC----------
---GTCTTT--TTACCTTT---ACAAAC-------GTATGTCCT----AGAATGTCTT----TGATGTA-TTTAATACAC
ATCTCAATACAACTTTCAACAACGGATCTCTTGGCTCTCGCATCGATGAAGAACGCAGCGAAATGCGATAAGTAATGTGA
ATTGCAGAATTCAGTGAATCATCGAATCTTTGAACGCACCTTGCACCCTTTGGTATTCCGAAGGGTACACCTGTTTGAG-
--------------------------------------------------------------------------------
--------------------------------------------------------------------------------
--------------------------------------------------------------------------------
---------------------------------???????????????????????????????????????????????
????????????????????????????????????????????????????????????????????????????????
????????????????????????????????????????????????????????????????????????????????
????????????????????????????????????????????????????????????????????????????????
????????????????????????????????????????????????????????????????????????????????
????????????????????????????????????????????????????????????????????????????????
????????????????????????????????????????????????????????????????????????????????
????????????????????????????????????????????????????????????????????????????????
????????????????????????????????????????????????????????????????????????????????
????????????????????????????????????????????????????????????????????????????????
????????????????????????????????????????????????????????????????????????????????
?????????????????????????????????????????????
>103_A_weirii_HHB13132                 
CACTGCAGGTGCTG----TAGCGTGCTAAATATAAGCAGGAGATT-----CGGGG-CATGTGCACG--CCTCGTTCGA-A
AAATCCACAACACACACCTGTGCACCTTAGCGTGGG--TCG-------GTC----TTAGTGCCGGCTTGC----------
---GTCTTT--TTACCTTT---ACAAAC-------GTATGTCCT----AGAATGTCTT----TGATGTA-TTTAATACAC
ATCTCAATACAACTTTCAACAACGGATCTCTTGGCTCTCGCATCGATGAAGAACGCAGCGAAATGCGATAAGTAATGTGA
ATTGCAGAATTCAGTGAATCATCGAATCTTTGAACGCACCTTGCACCCTTTGGTATTCCGAAGGGTACACCTGTTTGAG-
--------------------------------------------------------------------------------
--------------------------------------------------------------------------------
--------------------------------------------------------------------------------
---------------------------------???????????????????????????????????????????????
????????????????????????????????????????????????????????????????????????????????
????????????????????????????????????????????????????????????????????????????????
????????????????????????????????????????????????????????????????????????????????
????????????????????????????????????????????????????????????????????????????????
????????????????????????????????????????????????????????????????????????????????
????????????????????????????????????????????????????????????????????????????????
????????????????????????????????????????????????????????????????????????????????
????????????????????????????????????????????????????????????????????????????????
????????????????????????????????????????????????????????????????????????????????
????????????????????????????????????????????????????????????????????????????????
?????????????????????????????????????????????
>96_A_canadensis_Wu120790              
CATTAATGAAAC------TCTGACTGAG-GTTGTAGCTGGCCCT-TCG--CGGGG-CATGTGCACG--CCTCTTTCAC-A
ATCCACACA-CAC----CTGTGCACCTTTGCGTGAG-TCTCGGGAGCCGG-TCGGGTGGCAACGCCCTTCC-GTAGTACC
GGGCTCGCG--TCCCTTTC---ACAAACTC--TATGTATGTCTT---AAGAATGTCTA--CTCGATGTAAT-AAAA-CGC
ATCTAA-TACAACTTTCAACAACGGATCTCTTGGCTCTCGCATCGATGAAGAACGCAGCGAAATGCGATAAGTAATGTGA
ATTGCAGAATTCAGTGAATCATCGAATCTTTGAACGCACCTTGCGCCCTTTGGTATTCCGAAGGGCACACCTGTTTGAGT
GTCGTGAAATTCTCAACCCT-CCTCACTTT---TGTGGTGGCTG-------GGCTTGGACTTGGAGGCTTT--GCCGGAC
CG---------TTCGTGT-TCGGCTCCTCTCAAATGCATTAGTA-CGTCTT--GTTGCG---ATGTAC-CCTCGGTGTGA
TAATTATCTACGCTG---TGGTGTGCT-TGCTTCT-GGTGAG-AC-GCGCTT-CAAACCG-----TCCGAAAG-GACA--
-ATTCATCGAAACTTGACCTCAAAT-CAGGTGG???????????????????????????????????????????????
????????????????????????????????????????????????????????????????????????????????
????????????????????????????????????????????????????????????????????????????????
????????????????????????????????????????????????????????????????????????????????
????????????????????????????????????????????????????????????????????????????????
????????????????????????????????????????????????????????????????????????????????
????????????????????????????????????????????????????????????????????????????????
????????????????????????????????????????????????????????????????????????????????
????????????????????????????????????????????????????????????????????????????????
????????????????????????????????????????????????????????????????????????????????
????????????????????????????????????????????????????????????????????????????????
?????????????????????????????????????????????
>90_A_cerussatus_MRsn                  
CATTAATGAAAT------TCTGACTGAG-GTTGTAGCTGGCCCT-TCA--CGGGG-CATGTGCACA--CCTCTTTCAC-A
ATCCACACA-CAC----CTGTGCACCTTTGCGTGAG-TTTCGGGAATCGG-TCGGGTGGCAACGCCTTTCT-GTAGTACC
GGGCTCGCG--TCCTTTTC---ACAAACTC--TATGTATGTCTT---AAGAATGTCTA--CTCGATGTAAT-AAAA-CGC
ATCTAA-TACAACTTTCAACAACGGATCTCTTGGCTCTCGCATCGATGAAGAACGCAGCGAAATGCGATAAGTAATGTGA
ATTGCAGAATTCAGTGAATCATCGAATCTTTGAACGCACCTTGCGCCCTTTGGTATTCCGAAGGGCACACCTGTTTGAGT
GTCGTGAAATTCTCAACCCT-CCTCACTTT---TGTGACGGCTG-------GGCTTGGACTTGGAGGCTTT--GCCGGAC
CA---------TCTGCGT-TCGGCTCCTCTCAAATGCATTAGTA-CGTCTC--GTTGCG---ATGTAC-CCTCGGTGTGA
TAATTATCTACGCTG---TGGTGTGCT-TGCTTCT-GGTGGG-AC-GCGCTT-CAAACCG-----TCCGAAAG-GACA--
-CTTCATCGAAA-TTGACCTCAAAT-CAGGGGG???????????????????????????????????????????????
????????????????????????????????????????????????????????????????????????????????
????????????????????????????????????????????????????????????????????????????????
????????????????????????????????????????????????????????????????????????????????
????????????????????????????????????????????????????????????????????????????????
????????????????????????????????????????????????????????????????????????????????
????????????????????????????????????????????????????????????????????????????????
????????????????????????????????????????????????????????????????????????????????
????????????????????????????????????????????????????????????????????????????????
????????????????????????????????????????????????????????????????????????????????
????????????????????????????????????????????????????????????????????????????????
?????????????????????????????????????????????
>97_A_tropicus_BJFC022332_T            
CATTAATGAA-T------TCTGACTGAG-GTTGTAGCTGGCCCT-TCG--CGGGG-CATGTGCACG--CCTCTTTCAC-A
ATCCACACA-CAC----CTGTGCACCTTTGCGTGGG-TCTCGGGAACCGG-TCGGGTGGCAACGCCCTTCC-GTAGTAGC
GGGCTCGCG--TCCTTTTC---ACAAACTC--TATGTATGTCTT---AAGAATGTCTA--CTCGATGTAAT-AAAA-CGC
ATCTAA-TACAACTTTCAACAACGGATCTCTTGGCTCTCGCATCGATGAAGAACGCAGCGAAATGCGATAAGTAATGTGA
ATTGCAGAATTCAGTGAATCATCGAATCTTTGAACGCACCTTGCGCCCTTTGGTATTCCGAAGGGCACACCTGTTTGAGT
GTCGTGAAATTCTCAACCCT-CCTCACTTT---TGTGACGGCTG-------GGCTTGGACTTGGAGGCTTT--GCCGGAA
CG---------CTCGCGTATCGGCTCCTCTCAAATGCATTAGTA-CGTCTT--GTTGCG---ATGTAC-CCTCGGTGTGA
TAATTATCTACGCTG---TGGTGTGCT-TGCTTCT-GGTGAG-AC-GCGCTTTCAAACCG-----TCCGAAGG-GACA--
-CTTCATCGAAACTTGACCTCAAAT-CAGGTGG???????????????????????????????????????????????
????????????????????????????????????????????????????????????????????????????????
????????????????????????????????????????????????????????????????????????????????
????????????????????????????????????????????????????????????????????????????????
????????????????????????????????????????????????????????????????????????????????
????????????????????????????????????????????????????????????????????????????????
????????????????????????????????????????????????????????????????????????????????
????????????????????????????????????????????????????????????????????????????????
????????????????????????????????????????????????????????????????????????????????
????????????????????????????????????????????????????????????????????????????????
????????????????????????????????????????????????????????????????????????????????
?????????????????????????????????????????????
>98_A_tenuissimus_BJFC_022075_T        
CATTAATGAAAT------TCTGACTGAG-GTTGTCGCTGGCCCT-TCA--CGGGG-CATGTGCACG--CCTCTTTCAC-A
ATCCACACA-CAC----CTGTGCACCTTTGCGTGAGCTTTTTGGGAGCGA----GGCGGAAACGTC--TCTAGTACCGGG
AGGCTCGCG--TCCTTTTC---ACAAACTC---TTGTATGTCTT---CAGAATGTCTTACTTTGATGTTAT-AAAA-CGC
ATCTAAATACAACTTTCAACAACGGATCTCTTGGCTCTCGCATCGATGAAGAACGCAGCGAAATGCGATAAGTAATGTGA
ATTGCAGAATTCAGTGAATCATCGAATCTTTGAACGCACCTTGCGCCCTTTGGTATTCCGAAGGGCACACCTGTTTGAGT
GTCGTGAAATTCTCAACCCT-TCTCACTTT---TGTGCTGAA-G-------GGATTGGACTTGGAGGCTTT--GCCGG--
-----------CTTTTGTTTCGGCTCCTCTCAAATGCATTAGTA-CGTCTC--GTTGCG---ATGTGCGCCTCGGTGTGA
TAATTATCTACGCTG---TGC-----------------------------------------------------------
---------------------------------???????????????????????????????????????????????
????????????????????????????????????????????????????????????????????????????????
????????????????????????????????????????????????????????????????????????????????
????????????????????????????????????????????????????????????????????????????????
????????????????????????????????????????????????????????????????????????????????
????????????????????????????????????????????????????????????????????????????????
????????????????????????????????????????????????????????????????????????????????
????????????????????????????????????????????????????????????????????????????????
????????????????????????????????????????????????????????????????????????????????
????????????????????????????????????????????????????????????????????????????????
????????????????????????????????????????????????????????????????????????????????
?????????????????????????????????????????????
>100_A_ryvardenii_BJFC_022006_T        
CTGTAATGACTTT-CA-GGACGATCGAGAGTTGTAGCTGGCCCC-TTC--CCGGG-CATGTGCACG--CCTCTTTCGAGA
AATCCATCA-AACCC--CTGTGCACCTTTGCGTGAG------------------------TGGTCCCGGGC---AACCGG
GGGCCCTCGCGTCTTTTTTCTCACAAACCCC-TTTGTATGTCTTTAAAAGAATGTACT-ACTCGATGTGAT-AAAAAAAC
ATCTAA-TACAACTTTCAACAACGGATCTCTTGGCTCTCGCATCGATGAAGAACGCAGCGAAATGCGATAAGTAATGTGA
ATTGCAGAATTCAGTGAATCATCGAATCTTTGAACGCACCTTGCGCCCTTTGGTATTCCGAAGGGCACACCTGTTTGAGT
GTCGTGAAATTCTCAACCCCTCCTCGCTTTGT-TGCGACGCGTTGG-----GGCTTGGACTTGGAGGTTCTT-GCTGG--
-------------TCTCCGCCGGCTCCTCTCAAATGCATTAGTA-CGCCTC--GTTGCG-ATGTGGCTGCCTCGGTGTGA
TAATTATCTACGCCGTGTTGTGGTGCATTGCTTTC-CTTCGT------GCTT-CAAACCG-----TCCGTGAA-GGAC--
--ACTTTTGAAACTTGACCTCAAAT-CAGGTGG???????????????????????????????????????????????
????????????????????????????????????????????????????????????????????????????????
????????????????????????????????????????????????????????????????????????????????
????????????????????????????????????????????????????????????????????????????????
????????????????????????????????????????????????????????????????????????????????
????????????????????????????????????????????????????????????????????????????????
????????????????????????????????????????????????????????????????????????????????
????????????????????????????????????????????????????????????????????????????????
????????????????????????????????????????????????????????????????????????????????
????????????????????????????????????????????????????????????????????????????????
????????????????????????????????????????????????????????????????????????????????
?????????????????????????????????????????????
>101_A_mesaverdense_FP_120155          
CATTAATGAACT------TGTGATCGAG-GTTGTAGCTGGCCCTCTCA--CGGGGGCATGTGCACG--CCTCTTTCACCA
ATCCACACA-CAC----CTGTGCACCTTTGCGTGGG---TCGGGA------------GGTTCCGCTTGCGGGACAGTACC
-GGCTCGCG--TCCTTTTC---ACAAACCC--T-CGTATGTCTTT--AGGAATGTATC--TTTGATGTAAT-AAAAACGC
ATCTAC-AACAACTTTCAACAACGGATCTCTTGGCTCTCGCATCGATGAAGAACGCAGCGAAATGCGATAAGTAATGTGA
ATTGCAGAATTCAGTGAATCATCGAATCTTTGAACGCACCTTGCGCCCTTTGGTATTCCGAAGGGCACACCTGTTTGAGT
GTCGTGAAATTCTCAACCCT-CTTCACTTT---GTTGTGAGAAG-------GGCTTGGACTTGGAGGATTT--GCCGGAC
-----------GTCGAGT-TCGGCTCCTCTCAAATGCATTAGTG-CGTCTTT-GTTGCG---ATGTACGCTTCGGTGTGA
TAATTATCTACGTCGC--TGCTGTACT-TGCTTCT-TGTGGGGAC-GCGCTT-CCAACCG-----TCCGAAAG-GACA--
-ATTCATCGAACCTTGACCTCAAAT-CAGGTGG???????????????????????????????????????????????
????????????????????????????????????????????????????????????????????????????????
????????????????????????????????????????????????????????????????????????????????
????????????????????????????????????????????????????????????????????????????????
????????????????????????????????????????????????????????????????????????????????
????????????????????????????????????????????????????????????????????????????????
????????????????????????????????????????????????????????????????????????????????
????????????????????????????????????????????????????????????????????????????????
????????????????????????????????????????????????????????????????????????????????
????????????????????????????????????????????????????????????????????????????????
????????????????????????????????????????????????????????????????????????????????
?????????????????????????????????????????????
>84_G_wakullum_Oslo_930107             
????????????????????????????????????????????????????????????????????????????????
????????????????????????????????????????????????????????????????????????????????
????????????????????????????????????????????????????????????????????????????????
????????????????????????????????????????????????????????????????????????????????
????????????????????????????????????????????????????????????????????????????????
????????????????????????????????????????????????????????????????????????????????
????????????????????????????????????????????????????????????????????????????????
????????????????????????????????????????????????????????????????????????????????
?????????????????????????????????CCCCTAGTAACTGCGAGTGAAGCGGGAAAAGCTCAAATTTAAAATCT
GGCGG-CTCT-G-CCGTCCGAGTTGTAGTCTGGAGAACCGTTTTCCGCGTCGGACCGTGTACAAGTTTCCTGGAACGGAG
CGTCATAGAGGGTGAGAATCCCGTCTTTGACACGGACCCC-GATGCTTTGTGATGCGCTCTCAAAGAGTCGAGTTGTTTG
GGAATGCAGCTCAAAATGGGTGGTGAATTCCATCTAAAGCTAAATATTGGCGAGAGACCGATAGCGAACAAGTACCGTGA
GGGAAAGATGAAAAGCACTTTGGAAAGAGAGTGAAACAGTACGTGAAATTGTTGAARGGGAAACGCTTGAAGTAAGGCCC
GTCGGCTTGGACTCAGCCTTGC--ATCAGCTTGGTGTACTTCCATGTCGACGGGCCAGCATCAGTTTTGACCGCGGGAAA
AA-GGCTTGGGGAATGTGGCCTCC----ACAGGATTGTTATAGCCCTTTAGTCCATTCCACGGTTGGGACTGAGGTCATC
A-GCACGCCTTT--TT-GG-CCGGGG-TTCGCCCACGTT--CGTGCTTAGGATGCT-GCCGTAATGGCTTTAAACGACCC
GTCTTGAAACACGGACCAAGGAGTCTAACATGCCTGCGAGTGTTCGGGTGGAAAACCCGTGCGCGTAATGAAAGTGAAAG
TTGGGATCCCTGTCGTGGGGTGCACCGACGCCCGGACCAGACCTTCTGTGACGGATCTGCGGTAGAGCATGTATGTTGGG
ACCCGAAAGATGGTGAACTATGCCTGAATAGGGTGAAGCCAGAGGAAACTCTGGTGGAGGCTCGTAGCGATTCTGACGTG
CAAATCGATCGTCAAATTTGGGTATAGGGGCGAAAGACTAATCGA
>77_A_aurantius_T621                   
????????????????????????????????????????????????????????????????????????????????
????????????????????????????????????????????????????????????????????????????????
????????????????????????????????????????????????????????????????????????????????
????????????????????????????????????????????????????????????????????????????????
????????????????????????????????????????????????????????????????????????????????
????????????????????????????????????????????????????????????????????????????????
????????????????????????????????????????????????????????????????????????????????
????????????????????????????????????????????????????????????????????????????????
?????????????????????????????????CCCCTAGTAACTGCGAGTGAAGCGGGAAAAGCTCAAATTTAAAATCT
GGCAGTTTC--GGCTGTCCGAGTTGTAATCTGGAGAAGCGTTTTCCGCGTTGGACCGTGTATAAGTTTCCTGGAACGGAG
CGTCATAGAGGGTGAGAATCCCGTCTTTGACACGGACCCCCAATGCTTTGTGATACGCTCTCAAAGAGTCGAGTTGTTTG
GGAATGCAGCTCAAAATGGGTGGTGAATTCCATCTAAAGCTAAATATTGGCGAGAGACCGATAGCGAACAAGTACCGTGA
GGGAAAGATGAAAAGCACTTTGGAAAGAGAGTTAAACAGTACGTGAAATTGTTGAAAGGGAAACGCTTGAAGTCAGTCGC
GTCGGCCGGGACTCAGCCTTGC--ATTCGCTTGGTGTACTTTCCGGTTGACGGGCCAGCATCAATTTTGACCGCGGGATA
AA-GGCTAGAGAAAGGTGGCTCC-----TC-GGAGTGTTATAGTCTCTGGTCGCATGCCGCGGTTGGGATTGAGGAACTC
A-GCACGCCTTTAT---GG-TCGGGG-TTCGCCCACGTT--CGTGCTTAGGATGCT-GGCGTAATGGCTTTAAACGACCC
GTCTTGAAACACGGACCAAGGAGTCTAACATGCCTGCGAGTGTTCGGGTGGAAAACCCGTGCGCGCAATGAAAGTGAAAG
TTGGGATCTCTGTCGTGGAGTGCACCGACGCCCGGACCAGACCTTTTGTGACGGATCTGCGGTAGAGCATGTATGTTGGG
ACCCGAAAGATGGTGAACTATGCCTGAATAGGGTGAAGCCAGAGGAAACTCTGGTGGAGGCTCGTAGCGATTCTGACGTG
CAAATCGATCGTCAAATTTGGGTATAGGGGCGAAAGACTAATCGA
>79_G_leucoxanthum_HK9808              
????????????????????????????????????????????????????????????????????????????????
????????????????????????????????????????????????????????????????????????????????
????????????????????????????????????????????????????????????????????????????????
????????????????????????????????????????????????????????????????????????????????
????????????????????????????????????????????????????????????????????????????????
????????????????????????????????????????????????????????????????????????????????
????????????????????????????????????????????????????????????????????????????????
????????????????????????????????????????????????????????????????????????????????
?????????????????????????????????CCCCTAGTAACTGCGAGTGAAGCGGGAAAAGCTCAAATTTAAAATCT
GGCGG-TTTC-GGCCGTCCGAGTTGTAGTCTGGAGAAGCGTTTTCCGCGTCGGCCCGTGTACAAGTTTCCTGGAACGGAG
CGTCATAGAGGGTGAGAATCCCGTCTTTGACACGGACCCC-GATGCTTTGTGATGCGCTCTCAAAGAGTCGAGTTGTTTG
GGAATGCAGCTCAAAATGGGTGGTGAATTCCATCTAAAGCTAAATATTGGCGAGAGACCGATAGCGAACAAGTACCGTGA
GGGAAAGATGAAAAGCACTTTGGAAAGAGAGTTAAACAGTACGTGAAATTGTTGAAAGGGAAACGCTTGAAGTCAGTCGC
GTCGTCTTGGACTCAGCCTTGC--ATCAGCTTGGTGTTCTTCCATGTCGACGGGCCAGCATCAGTTTTGCCCGCGAGACA
AA-GGCGGAGGGAATGTGGCTCTT----TCGGGAGTGTTATAGCCCTTCGTCACATGCGTCGGTTGGGACTGAGGTCATC
A-GCACGCCTTTAT---GG-CCGGGG-TTCGCCCACGTA--CGTGCTTAGGATGCT-CGCGTAATGGCTTTAAACGACCC
GTCTTGAAACACGGACCAAGGAGTCTAACATGCCTGCGAGTGTTCGGGTGGAAAACCCGTGCGCGTAATGAAAGTGAAAG
TTGGGATCCCTGTCGTGGGGTGCACCGACGCCCGGACCAGACCTTTTGTGACGGATCTGCGGTAGAGCATGTATGTTGGG
ACCCGAAAGATGGTGAACTATGCCTGAATAGGGTGAAGCCAGAGGAAACTCTGGTGGAGGCTCGTAGCGATTCTGACGTG
CAAATCGATCGTCAAATTTGGGTATAGGGGCGAAAGACTAATCGA
>81_A_weirii_HHB12678                  
????????????????????????????????????????????????????????????????????????????????
????????????????????????????????????????????????????????????????????????????????
????????????????????????????????????????????????????????????????????????????????
????????????????????????????????????????????????????????????????????????????????
????????????????????????????????????????????????????????????????????????????????
????????????????????????????????????????????????????????????????????????????????
????????????????????????????????????????????????????????????????????????????????
????????????????????????????????????????????????????????????????????????????????
?????????????????????????????????CCCCTAGTAACTGCGAGTGAAGCGGGAAAAGCTCAAATTTAAAATCT
GGCGGTTTC--GGCCGTCCGAGTTGTAATCTGGAGAAGTGTTTTCCGCGTTGGACCGTGCACAAGTTTCCTGGAACGGAG
CGTCATAGAGGGTGAGAATCCCGTCTTTGGCACGGACCCC-AATGCTTTGTGATACACTCTCAAAGAGTCGAGTTGTTTG
GGAATGCAGCTCAAAATGGGTGGTGAATTCCATCTAAAGCTAAATATAGGCGAGAGACCGATAGCGAACAAGTACCGTGA
GGGAAAGATGAAAAGCACTTTGGAAAGAGAGTTAAACAGTACGTGAAATTGTTGAAAGGGAAACGCTTGAAGTCAGTCGC
GTTGGCCGGGACTCAGCCTTGC--TCCGGCATGGTGTACTTTCCGGTTGACGGGCCAACATCAATTTTGACCTCGGGATA
AA-GTCTAGGGGAAGGTGGCTCTT-----C-GGAGTGTTATAGCCTCTAGTCGCATACCGAGATTGGGATTGAGGAATCC
A-GTGC--------------------------------T--TGCACTTGGGATGTT-GGCGTAATGGCTTTAAACGACCC
GTCTTGAAACACGGACCAAGGAGTCTAACATGCCTGCGAGTGTTCGGGTGGAAAACCCGTGCGCGTAATGAAAGTGAAAG
TTGGGAAACCTGTCGTGGGTTGCACCGACGCCCGGACCAGAACTTTTGTGACGGCTCTGCGGTAGAGCATGTATGTTGGG
ACCCGAAAGATGGTGAACTATGCCTGAATAGGGTGAAGCCAGAGGAAACTCTGGTGGAGGCTCGTAGCGATTCTGACGTG
CAAATCGATCGTCAAATTTGGGTATAGGGGCGAAAGACTAATCGA
>82_A_norvegicum_T623                  
????????????????????????????????????????????????????????????????????????????????
????????????????????????????????????????????????????????????????????????????????
????????????????????????????????????????????????????????????????????????????????
????????????????????????????????????????????????????????????????????????????????
????????????????????????????????????????????????????????????????????????????????
????????????????????????????????????????????????????????????????????????????????
????????????????????????????????????????????????????????????????????????????????
????????????????????????????????????????????????????????????????????????????????
?????????????????????????????????CCCCTAGTAACTGCGAGTGAAGCGGGAAAAGCTCAAATTTAAAATCT
GGCGGTTTC--GGCCGTCCGAGTTGTAATCTGGAGAAGCGTTTTCCGCGTTGGACCGTGCACAAGTTTCCTGGAACGGAG
CGTCATAGAGGGTGAGAATCCCGTCTTTGGCACGGACCCC-AATGCTTTGTGATACGCTCTCAAAGAGTCGAGTTGTTTG
GGAATGCAGCTCAAAATGGGTGGTGAATTCCATCTAAAGCTAAATATAGGCGAGAGACCGATAGCGAACAAGTACCGTGA
GGGAAAGATGAAAAGCACTTTGGAAAGAGAGTTAAACAGTACGTGAAATTGTTGAAAGGGAAACGCTTGAAGTCAGTCGC
GTTGGCCGGGACTCAGCCTTGC--TTTTGCGTGGTGTACTTTCCGGTCGACGGGCCAACATCAATTTTGGTCTCGGGATA
AA-GTTGAGAGGAATGTGGCTCTT----TCGGGAGTGTTATAGCCTCTCTTCGCATACCGAGGCTGGGATTGAGGTATCC
A-GCGC--------------------------------T--TGCGCTTGGGATGTT-GGCGTAATGGCTTTAAACGACCC
GTCTTGAAACACGGACCAAGGAGTCTAACATGCCTGCGAGTGTTCGGGTGGAAAACCCGTGCGCGTAATGAAAGTGAAAG
TTGGGAAACCTGTCGTGGGTTGCACCGACGCCCGGACCAGAACTTCTGTGACGGATCTGCGGTAGAGCATGTATGTTGGG
ACCCGAAAGATGGTGAACTATGCCTGAATAGGGTGAAGCCAGAGGAAACTCTGGTGGAGGCTCGTAGCGATTCTGACGTG
CAAATCGATCGTCAAATTTGGGTATAGGGGCGAAAGACTAATCGA
>85_G_discolor                         
????????????????????????????????????????????????????????????????????????????????
????????????????????????????????????????????????????????????????????????????????
????????????????????????????????????????????????????????????????????????????????
????????????????????????????????????????????????????????????????????????????????
????????????????????????????????????????????????????????????????????????????????
????????????????????????????????????????????????????????????????????????????????
????????????????????????????????????????????????????????????????????????????????
????????????????????????????????????????????????????????????????????????????????
?????????????????????????????????CCCCTAGTAACTGCGAGTGAAGCGGGAAAAGCTCAAATTTAAAATCT
GGTGGTCTTT-GGCCACCCGAGTTGTAGTCTGGAGAAGCGTTTTCCGCGCTGGACCGTGCACAAGTCTCCTGGAACGGAG
CGTCATAGAGGGTGAGAATCCCGTCTTTGGCACGGATGACCAGTGCTTTGTGATGCGCTCTCGAAGAGTCGAGTTGTTTG
GGAATGCAGCTCAAAATGGGTGGTGAATTCCATCTAAAGCTAAATATTGGCGAGAGACCGATAGCGAACAAGTACCGTGA
GGGAAAGATGAAAAGCACTTTGGAAAGAGAGTTAAACAGTACGTGAAATTGTTGAAAGGGAAACGCTTGAAGTCAGTCGC
GTC--TTGAGACTCAGCCTTGC--TTTTGCTTGGTGTACTTCTCAGTGAACGGGCCAGCATCACTTTTGACCGTTGGATA
AA-GGCGAGAGAAAGGTGGCACCC----TCGGGTGTGTTATAGTCTCTTGTCGCATACAACGGTTGGGAGTGAGGAACTC
A-GCACGCCGC-AA---GG-TCGGGG-TTCGCCCACGTT--CGTGCTTAGGATGCT-GGCGTAATGGCTTTAAACGACCC
GTCTTGAAACACGGACCAAGGAGTCTAACATGCCTGCGAGTGTTCGGGTGGAAAACCCGTGCGCGTAATGAAAGTGAAAG
TTGGGACCTCTGTCGTGGAGGGCACCGACGCCCGGACCAGACCTTTTGTGACGGATCTGCGGTAGAGCATGTATGTTGGG
ACCCGAAAGATGGTGAACTATGCCTGAATAGGGTGAAGCCAGAGGAAACTCTGGTGGAGGCTCGTAGCGATTCTGACGTG
CAAATCGATCGTCAAATTTGGGTATAGGGGCGAAAGACTAATCGA
>86_G_aspellum_LIN625                  
????????????????????????????????????????????????????????????????????????????????
????????????????????????????????????????????????????????????????????????????????
????????????????????????????????????????????????????????????????????????????????
????????????????????????????????????????????????????????????????????????????????
????????????????????????????????????????????????????????????????????????????????
????????????????????????????????????????????????????????????????????????????????
????????????????????????????????????????????????????????????????????????????????
????????????????????????????????????????????????????????????????????????????????
?????????????????????????????????CCCCTAGTAACTGCGAGTGAAGCGGGAAAAGCTCAAATTTAAAATCT
GGCGG-TCTC-GGCCGTCCGAGTTGTAGTCTGGAGAAGCGTCTTCCGCGCTGGACCGTGTACAAGTCTCCTGGAACGGAG
CGTCATAGAGGGTGAGAATCCCGTCTTTGACACGGATCCC-AGTGCTTTGTGATGCGCTCTCAAAGAGTCGAGTTGTTTG
GGAATGCAGCTCAAAATGGGTGGTGAATTCCATCTAAAGCTAAATATTGGCGAGAGACCGATAGCGAACAAGTACCGTGA
GGGAAAGATGAAAAGCACTTTGGAAAGAGAGTTAAACAGTACGTGAAATTGTTGAAAGGGAAACGCTTGAAGTCAGTCGC
GTCGTCCAGGACTCAGCCTTA----------TGGTGTACT-CCTGGTCGACGGGCCAGCATCAGTTTTGACCGCGAGATA
AA-GGCGYCGGGAATGTGGCTTCT----TCGGGAGTGTTATAGCCCTTCGTCAGATGTCGTGGTTGGGACTGAGGACCGC
A-GC-----TTT--TT----------------------------GCTTAGGATGCT-GGCGTAATGGCTTTAAACGACC-
DTCTTGAAACACGGACCAAGGAGTCTAACATGCCTGCGAGTGTTCGGGTGGAAAACCCGTGCGCGTAATGAAAGTGAAAG
TTGGGATCCCTGTCGTGGGGTGCACCGACGCCCGGACCAGACCTTTTGTGACGGATCTGCGGTAGAGCATGTATGTTGGG
ACCCGAAAGATGGTGAACTATGCCTGAATAGGGTGAAGCC-GAGGAAACTCTGGTGGAGGCTCGTAGCGATTCTGACGTG
CAAATCGATCGTCAAATTTGGGTATAGGGGCGAAAGACTAATCGA
>87_B_macrospora_Wu920221              
????????????????????????????????????????????????????????????????????????????????
????????????????????????????????????????????????????????????????????????????????
????????????????????????????????????????????????????????????????????????????????
????????????????????????????????????????????????????????????????????????????????
????????????????????????????????????????????????????????????????????????????????
????????????????????????????????????????????????????????????????????????????????
????????????????????????????????????????????????????????????????????????????????
????????????????????????????????????????????????????????????????????????????????
?????????????????????????????????CCCCTAGTAACTGCGAGTGAAGCGGGAAAAGCTCAAATTTAAAATCT
GGCGG-CTCA-GGTCGTCCGAGTTGTAGTCTGGAGAAGCGTTTTCCGCGYTGGACCGTGTACAAGTCTCCTGGAACGGAG
CGTCGTAGAGGGTGAGAATCCCGTCTTTGACACGGACCCC-AGTGCTTTGTGATGCGCTCTCAAAGAGTCGAGTTGTTTG
GGAATGCAGCTCAAAATGGGTGGTGAATTCCATCTAAAGCTAAATATTGGCGAGAGACCGATAGCGAACAAGTACCGTGA
GGGAAAGATGAAAAGCACTTTGGAAAGAGAGTTAAACAGTACGTGAAATTGTTGAAAGGGAAACGCTTGAAGTCAGTCGC
GTCGTCCAGGACTCAGCCTCA----------CGGTGTACTTCCTGGTTGACGGGCCAGCATCAGTTTTGACCGCGAGATA
AA-GGCGTAGGGAATGTGGCCTCT----TCGGGAGTGTTATAGCCCTTCGTCARATGTCGTGGTTGGGACTGAGGACCGC
A-GC-----TTT-TTT----------------------------GCTTAGGATGCT-GGCGTAATGGCTTTAAACGACC-
DTCTTGAAACACGGACCAAGGAGTCTAACATGCCTGCGAGTGTTCGGGTGGAAAACCCGTGCGCGTAATGAAAGTGAAAG
TTGGGATCCCTGTCGTGGGGTGCACCGACGCCCGGACCAGACCTTCTGTGACGGATCTGCGGTAGAGCATGTATGTTGGG
ACCCGAAAGATGGTGAACTATGCCTGAATAGGGTGAAGCC-GAGGAAACTCTGGTGGAGGCTCGTAGCGATTCTGACGTG
CAAATCGATCGTCAAATTTGGGTATAGGGGCGAAAGACTAATCGA
>104_S_hirsutum_NH7960                 
????????????????????????????????????????????????????????????????????????????????
????????????????????????????????????????????????????????????????????????????????
????????????????????????????????????????????????????????????????????????????????
????????????????????????????????????????????????????????????????????????????????
????????????????????????????????????????????????????????????????????????????????
????????????????????????????????????????????????????????????????????????????????
????????????????????????????????????????????????????????????????????????????????
????????????????????????????????????????????????????????????????????????????????
?????????????????????????????????CCCCTAGTAACTGCGAGTGAAGCGGGAAAAGCTCAAATTTAAAATCT
GGCGGTCTTCTGGCCGTCCGAGTTGTAGTCTGGAGAAGCGTTTTCCGCGYTGGACCGTGTACAAGTYTCCTGGAACGGAG
CGTCATAGAGGGTGAGAATCCCGTCTTTGACACGGATCCC-AATGCTTTGTGATGCGCTCTCAAAGAGTCGAGTTGTTTG
GGAATGCAGCTCAAAATGGGTGGTGAATTCCATCTAAAGCTAAATATTGGCGAGAGACCGATAGCGAACAAGTACCGTGA
GGGAAAGATGAAAAGCACTTTGGAAAGAGAGTTAAACAGTACGTGAAATTGTTGAAAGGGAAACGCTTGAAGTCAGTCGC
GTCGGCCGGGACTCAGCCTTGC--ATCCGCTTGGTGTACTTTCCGGTCGACGGGCCAGCATCAGTTTTGACCGCGAGATA
AA-GGCGGAGGGAATGTGGCTCTC----TCGGGAGTGTTATAGCCCTTCGTCAGATGTCGCGGTTGGGACTGAGGAACTC
A-GCACGCCTTT---ATGG-CCGGGG-CTCGCCCACGTA--CGTGCTTAGGATGCT-GGCGTAATGGCTTTAAACGACCC
GTCTTGAAACACGGACCAAGGAGTCTAACATGCCTGCGAGTGTTCGGGTGGAAAACCCGTGCGCGCAATGAAAGTGAAAG
TTGGGATCCCTGTCGTGGGGTGCACCGACGCCCGGCCCAGACCTTTTGTGACGGAGCTGCGGTAGAGCATGTATGTTGGG
ACCCGAAAGATGGTGAACTATGCCTGAATAGGGTGAAGCCAGAGGAAACTCTGGTGGAGGCTCGTAGCGATTCTGACGTG
CAAATCGATCGTCAAATTTGGGTATAGGGGCGAAAGACTAATCGA
>88_M_chelidonium_LodgeSJ1101          
????????????????????????????????????????????????????????????????????????????????
????????????????????????????????????????????????????????????????????????????????
????????????????????????????????????????????????????????????????????????????????
????????????????????????????????????????????????????????????????????????????????
????????????????????????????????????????????????????????????????????????????????
????????????????????????????????????????????????????????????????????????????????
????????????????????????????????????????????????????????????????????????????????
????????????????????????????????????????????????????????????????????????????????
?????????????????????????????????CCCCTAGTAACTGCGAGTGAAGCGGGAAAAGCTCAAATTTAAAATCT
GGCGG-T-TC-TGCCGTCCGAGTTGTAGTCTGGAGAAGCGTTTTCCGTGCTGGACCGTGTACAAGTCTCCTGGAACGGAG
CGTCATAGAGGGTGAGAATCCCGTCTTTGACACGGATCCC-AGTGCTTTGTGATGCGCTCTCAAAGAGTCGAGTTGTTTG
GGAATGCAGCTCAAAATGGGTGGTGAATTCCATCTAAAGCTAAATATTGGCGAGAGACCGATAGCGAACAAGTACCGTGA
GGGAAAGATGAAAAGCACTTTGGAAAGAGAGTTAAACAGTACGTGAAATTGTTGAAAGGGAAACGCTTGAAGTCAGTCGC
GTCGTCCAGGACTCAGCCTTA----------TGGTGTACTTCCTGGTTGACGGGCCAGCATCAGTTTTGACCGCGAGACA
AA-GGTGTGGGGAATGTGGCTTCT----TCGGGAGTGTTATAGCCCTGCGTCGTATGTCGTGGTTGGGACTGAGGACCGC
A-GC-----TTT--------------------------------GCTTAGGATGCT-GGCGTAATGGCTTTAAACGACCC
GTCTTGAAACACGGACCAAGGAGTCTAACATGCCTGCGAGTGTTCGGGTGGAAAACCCGTGCGCGTAATGAAAGTGAAAG
TTGGGATCCCTGTCGTGGGGTGCACCGACGCCCGGACCAGACCTTTTGCGACGGATCTGCGGTAGAGCATGTATGTTGGG
ACCCGAAAGATGGTGAACTATGCCTGAATAGGGTGAAGCC-GAGGAAACTCTGGTGGAGGCTCGTAGCGATTCTGACGTG
CAAATCGATCGTCAAATTTGGGTATAGGGGCGAAAGACTAATCGA
